# Supplementary material for: The Evolutionary History of Common Genetic Variants Influencing Human Cortical Surface Area
Source: PubMed Central journal article supplement (PMC7945014; doi:10.1093/cercor/bhaa327), 2020-12-09

# Mean\_insula\_surfav: rs976423

Chromosome 8

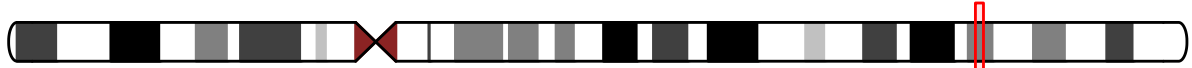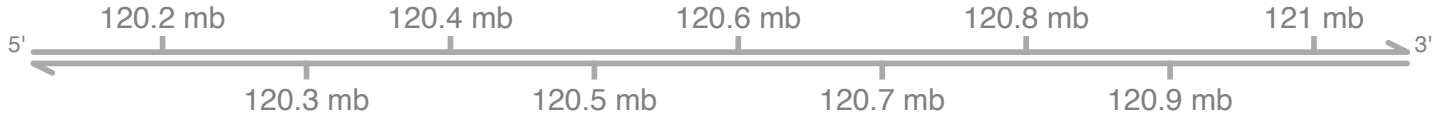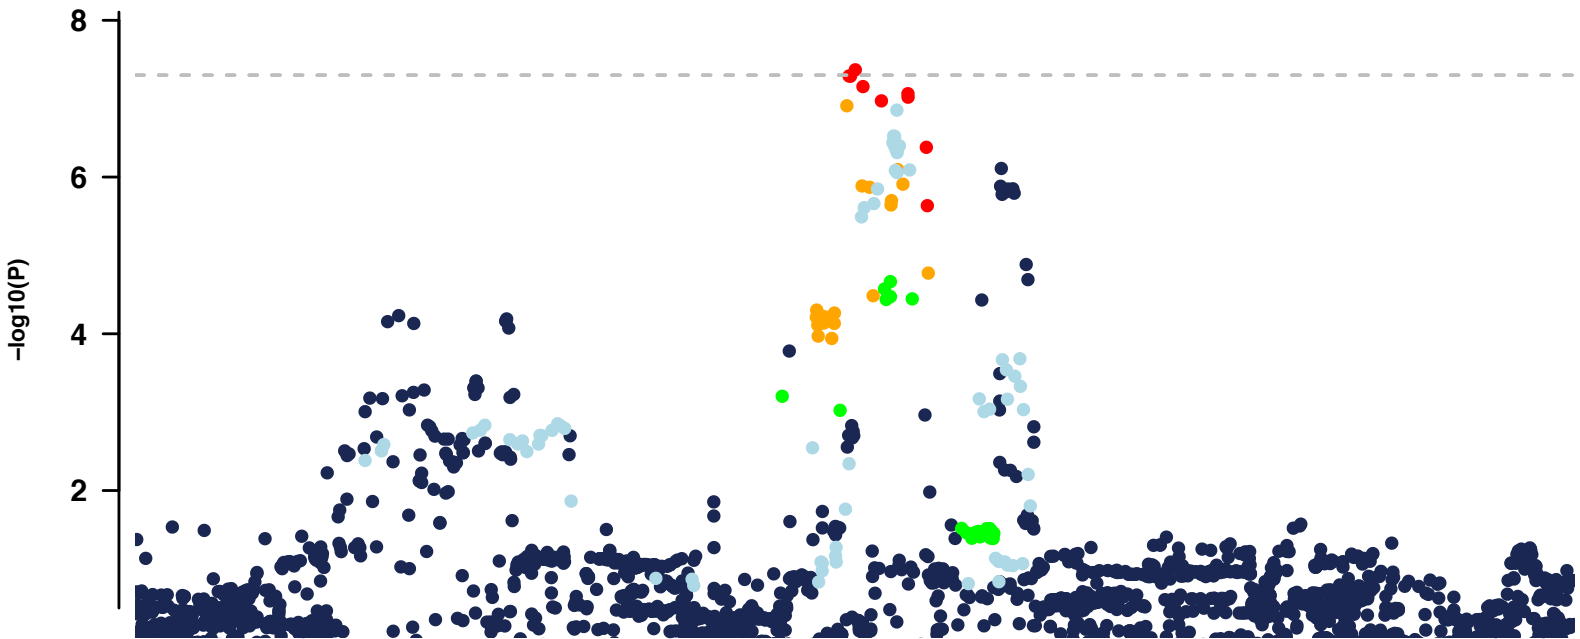

COLEC10

NOV

ENPP2

DSCC1

MAL2

TAF2

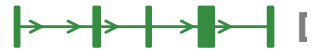

HGE

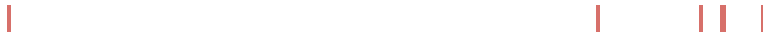

# Mean\_transversetemporal\_suravg: rs11785060

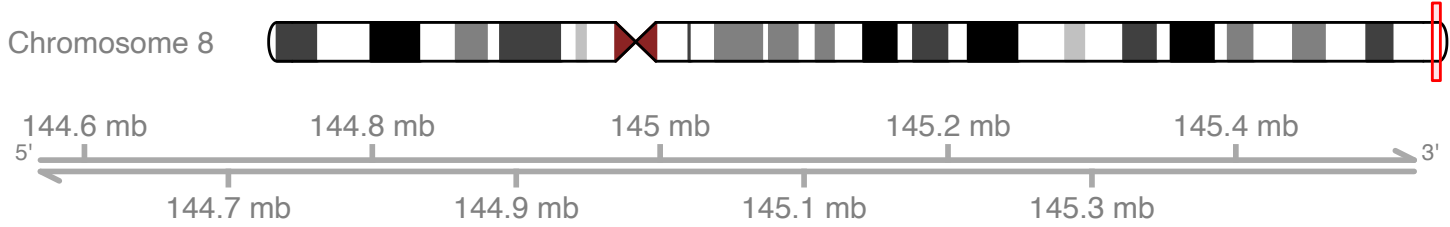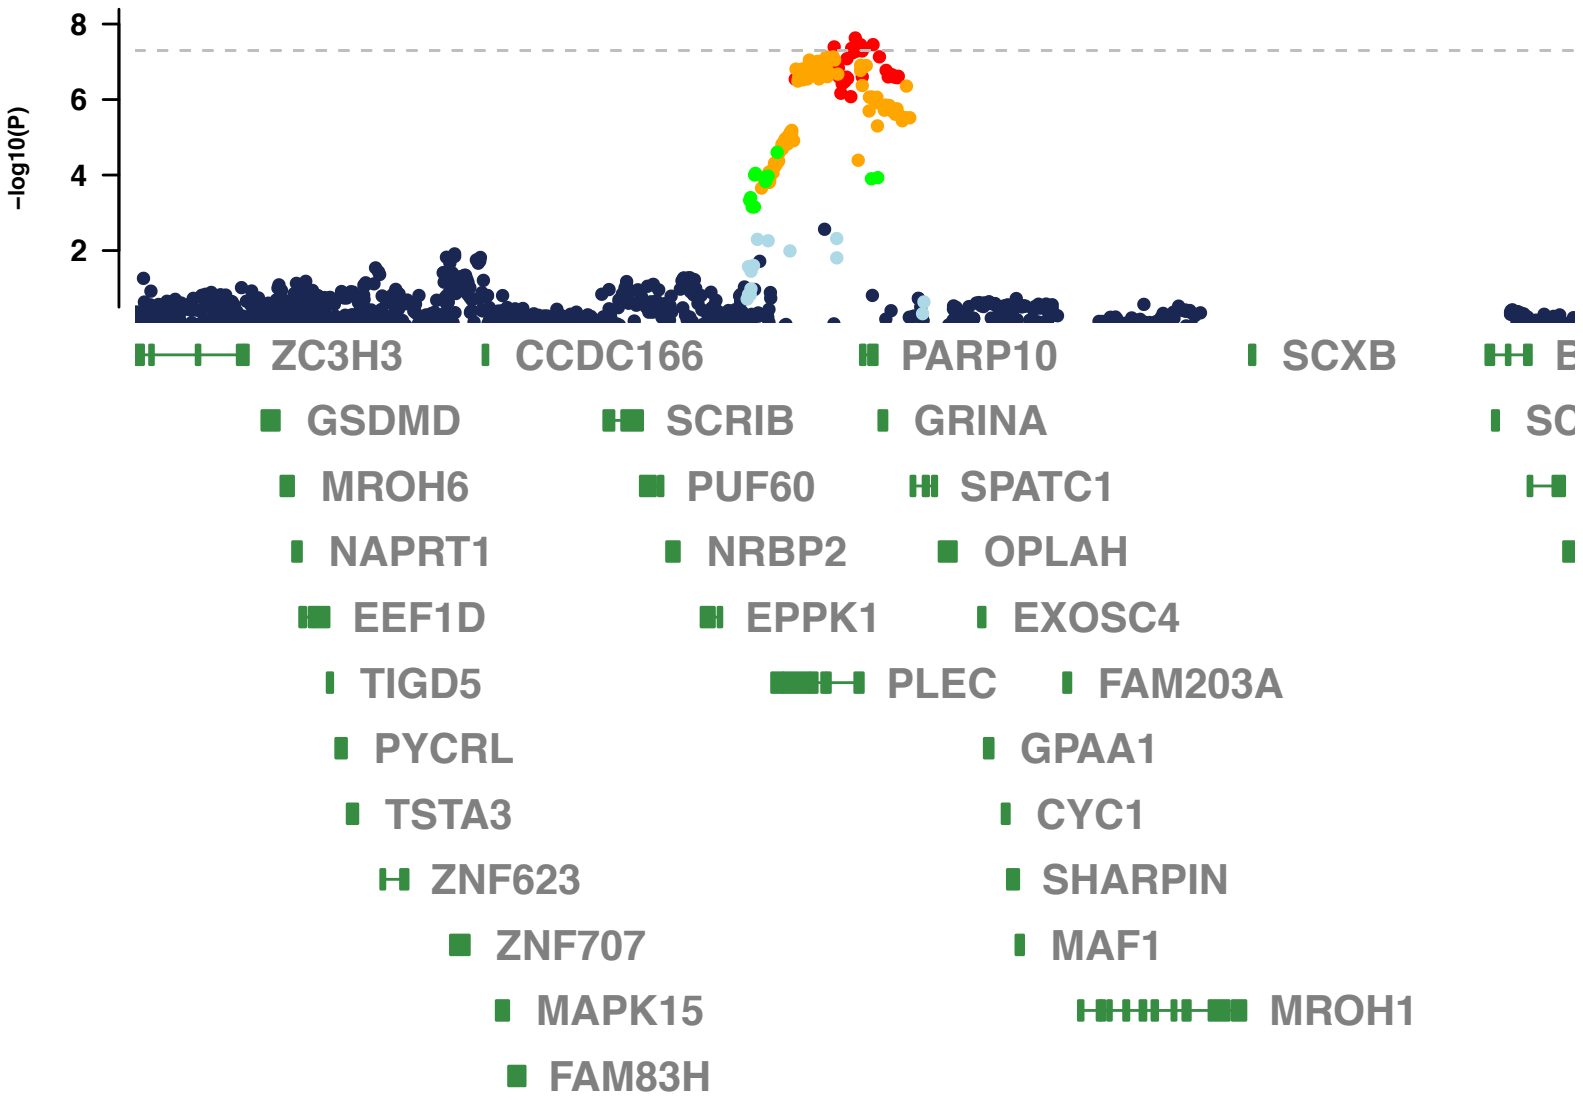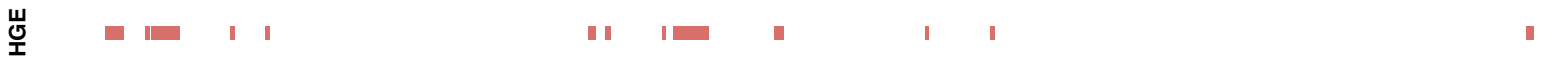

# Mean\_supramarginal\_surfav: rs2200225

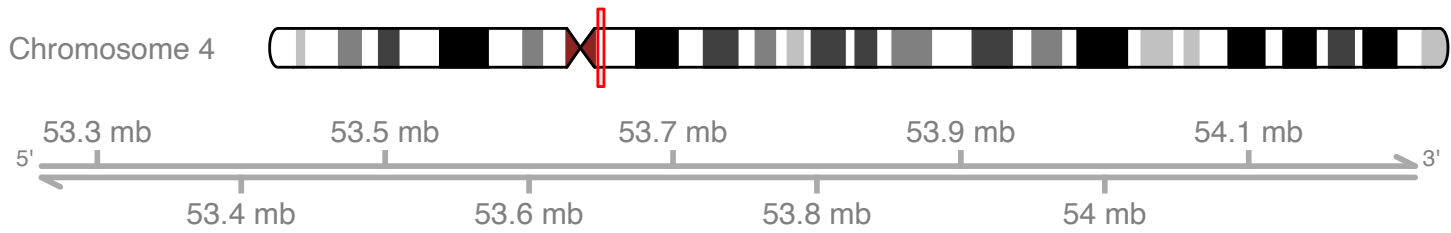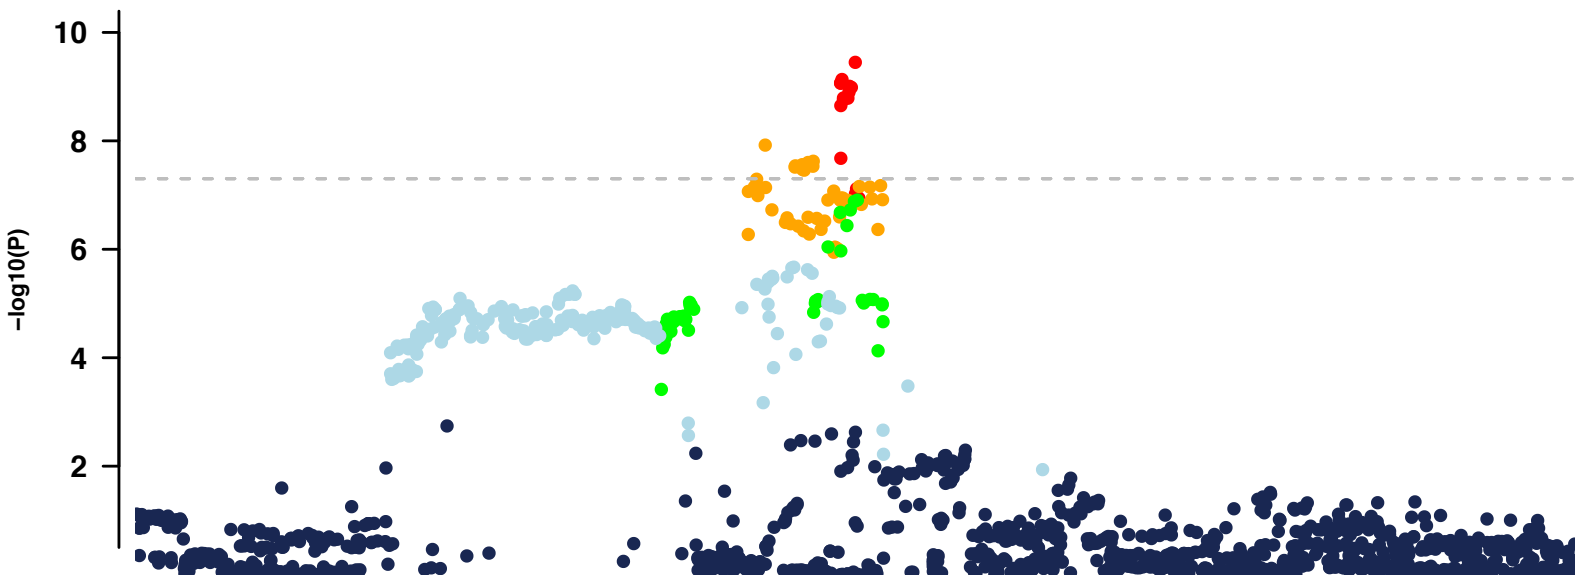

USP46

RASL11B

SNORA26

ERVMER34-1

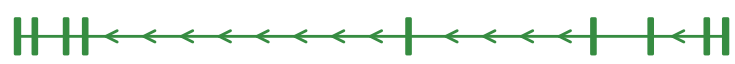

HGE

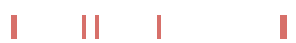

# Mean\_supramarginal\_surfav: rs2279829

Chromosome 3

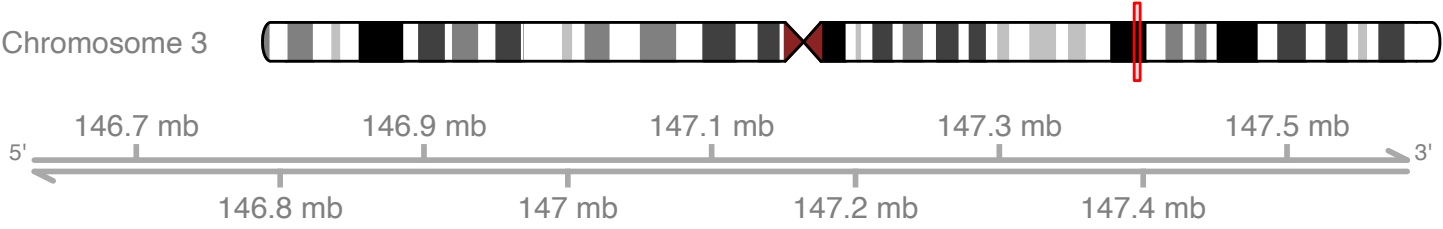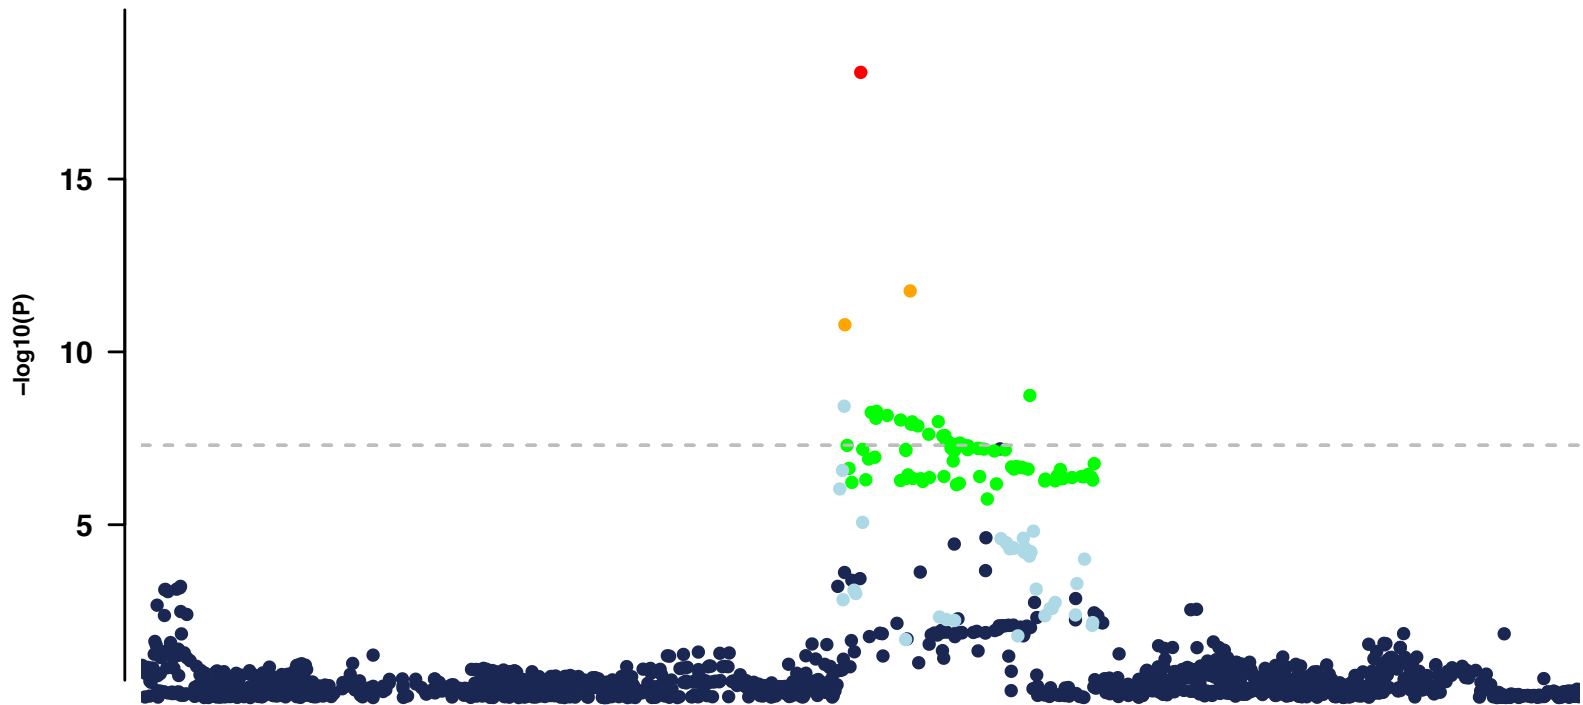

ZIC4

ZIC1

HGE

|

||

|

# Mean\_supramarginal\_surfavg: rs78502100

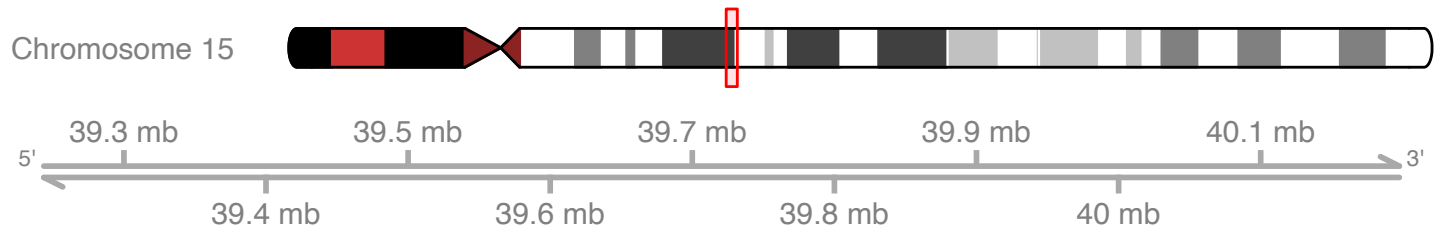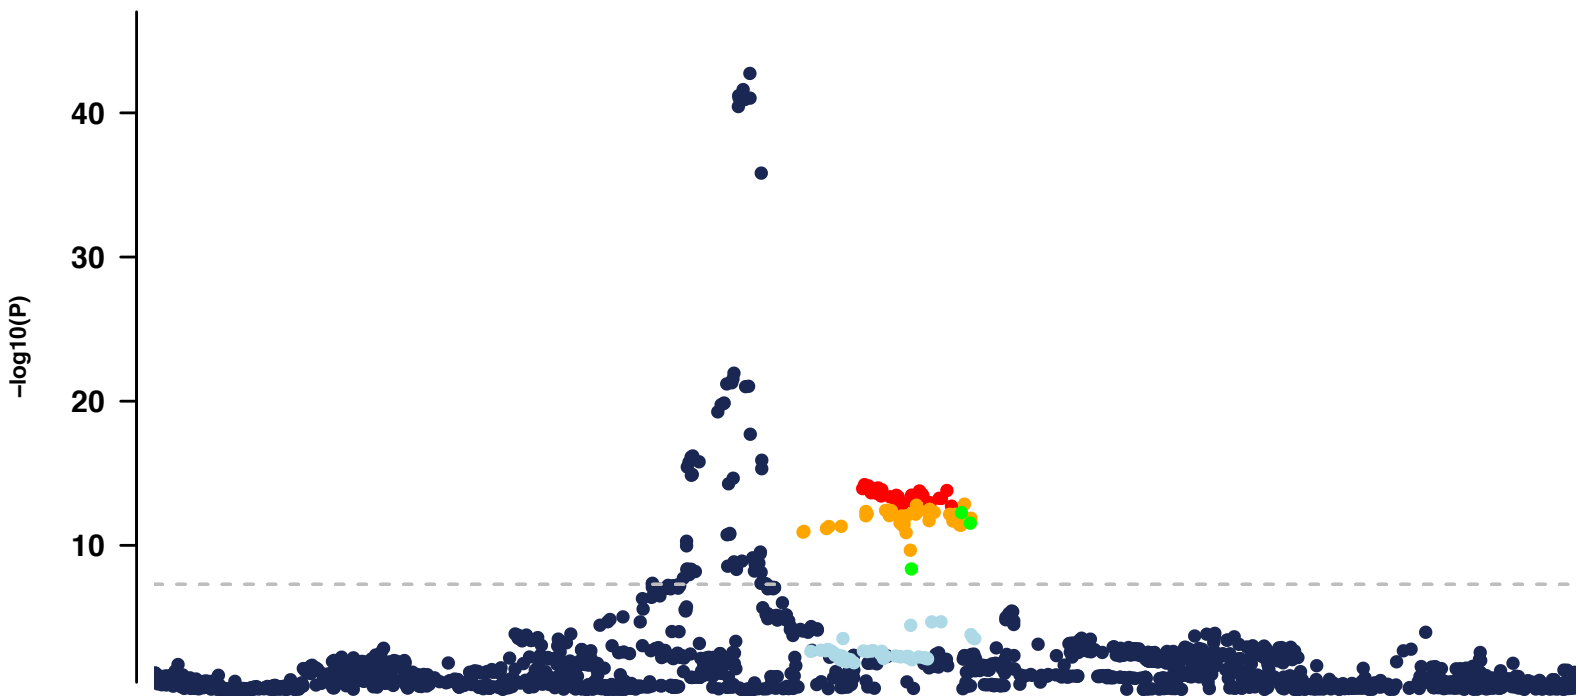

C15orf54

THBS1

||||<<<<|

||||<<<<||| FSIP1

HGE

|

|

|

|

|

# Mean\_superiorparietal\_surfvavg: rs6554054

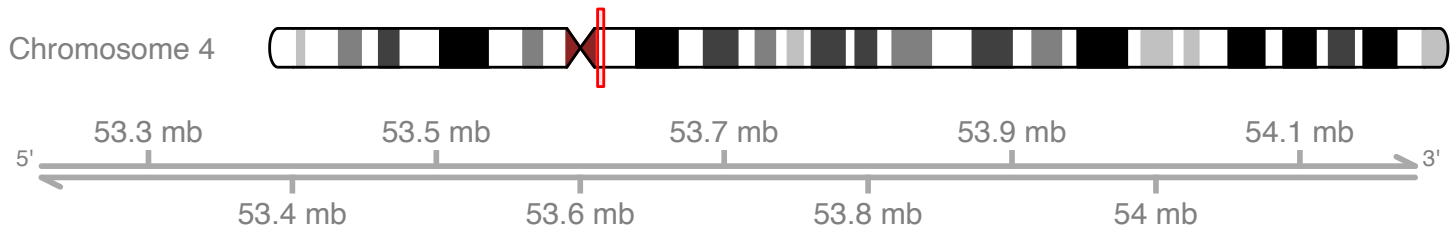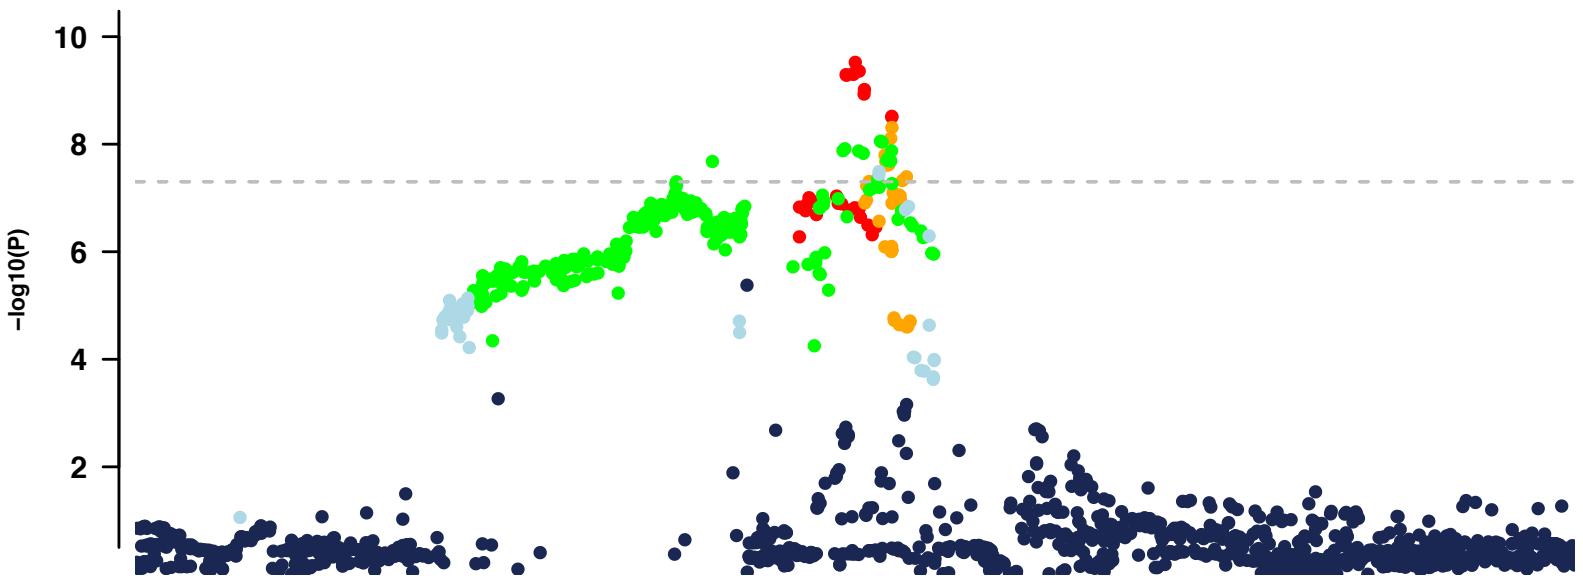

USP46

RASL11B

SNORA26

ERVMER34-1

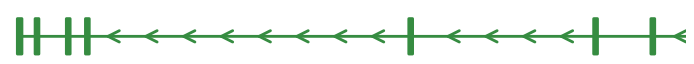

HGE

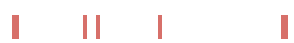

# Mean\_superiorparietal\_suravg: rs79272390

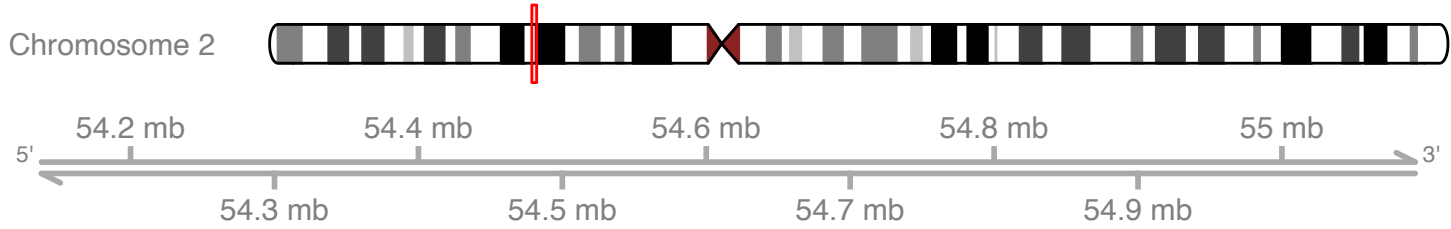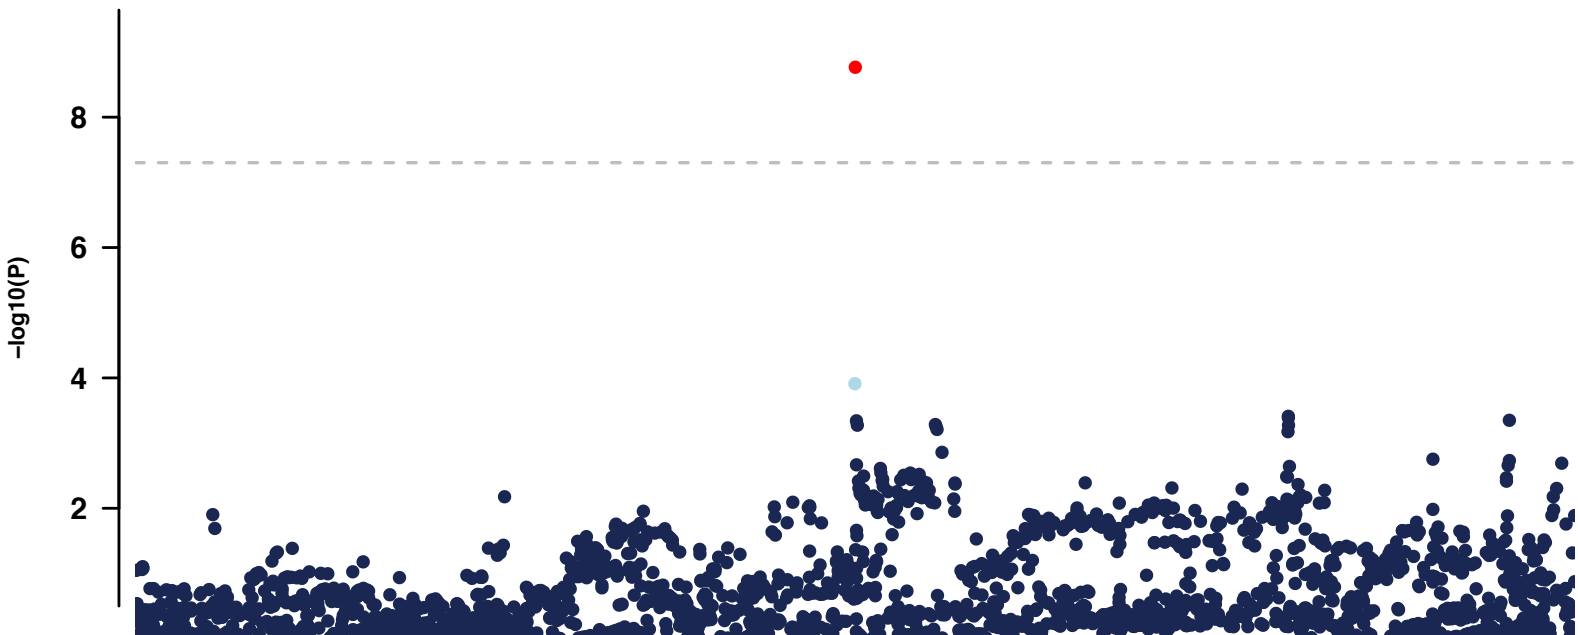

PSME4

TSPYL6

SPTBN1

ACYP2

C2orf73

HGE

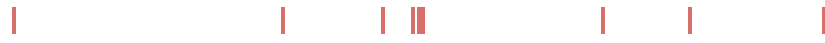

# Mean\_superiorfrontal\_surfvag: rs142301939

Chromosome 6

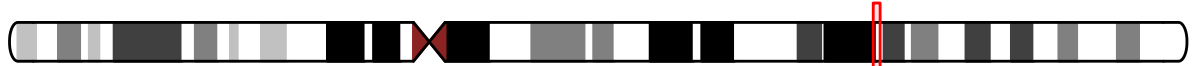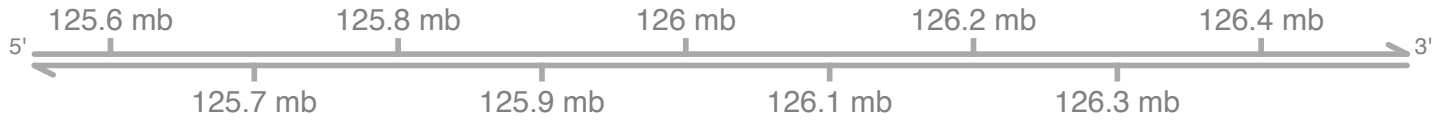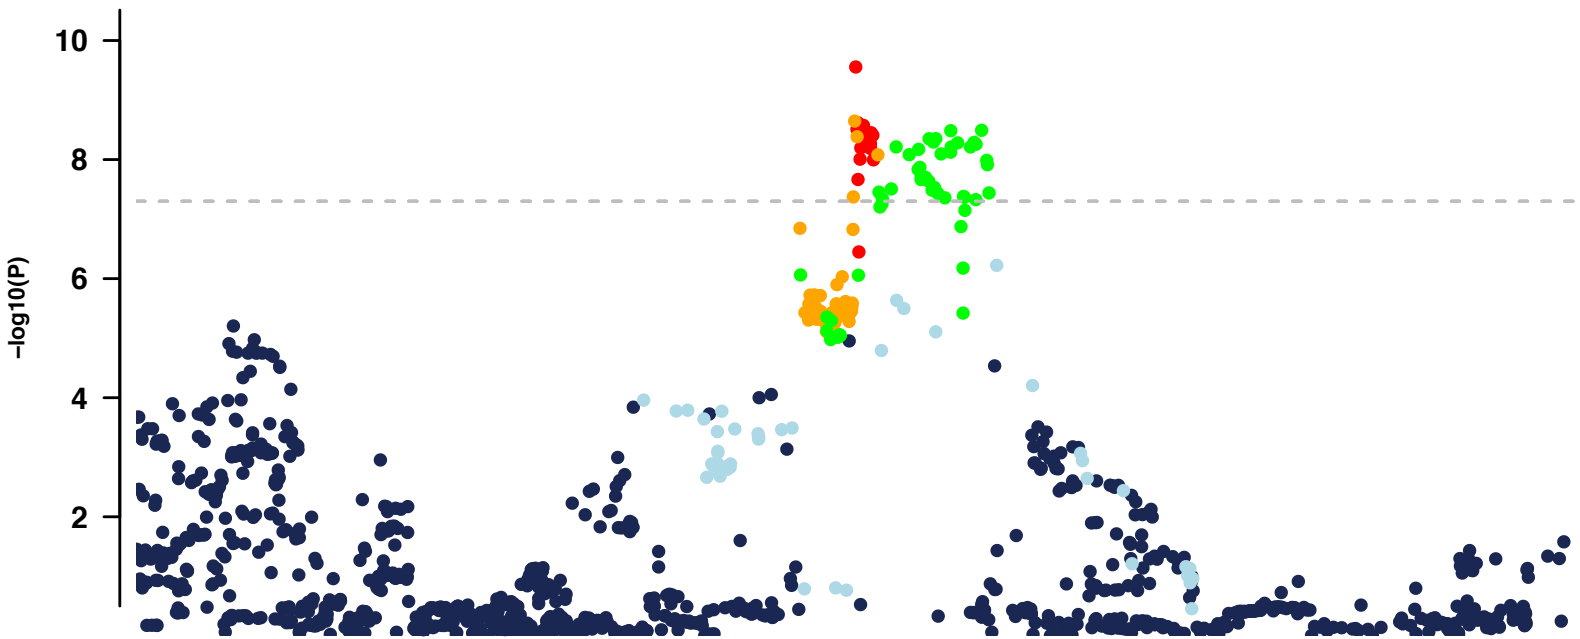

TPD52L1

HEY2

HINT3

HDDC2

NCOA7

TRMT11

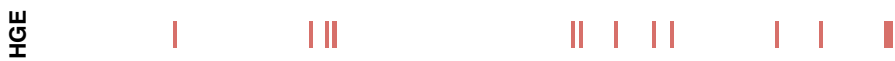



# Mean\_superiorfrontal\_surfav: rs4915928

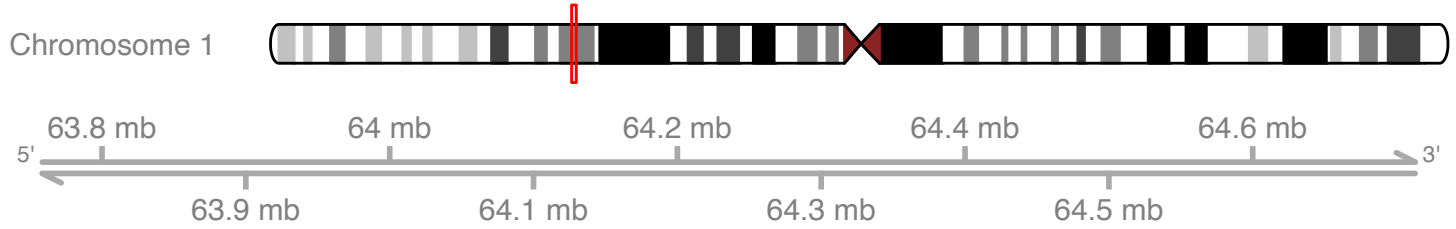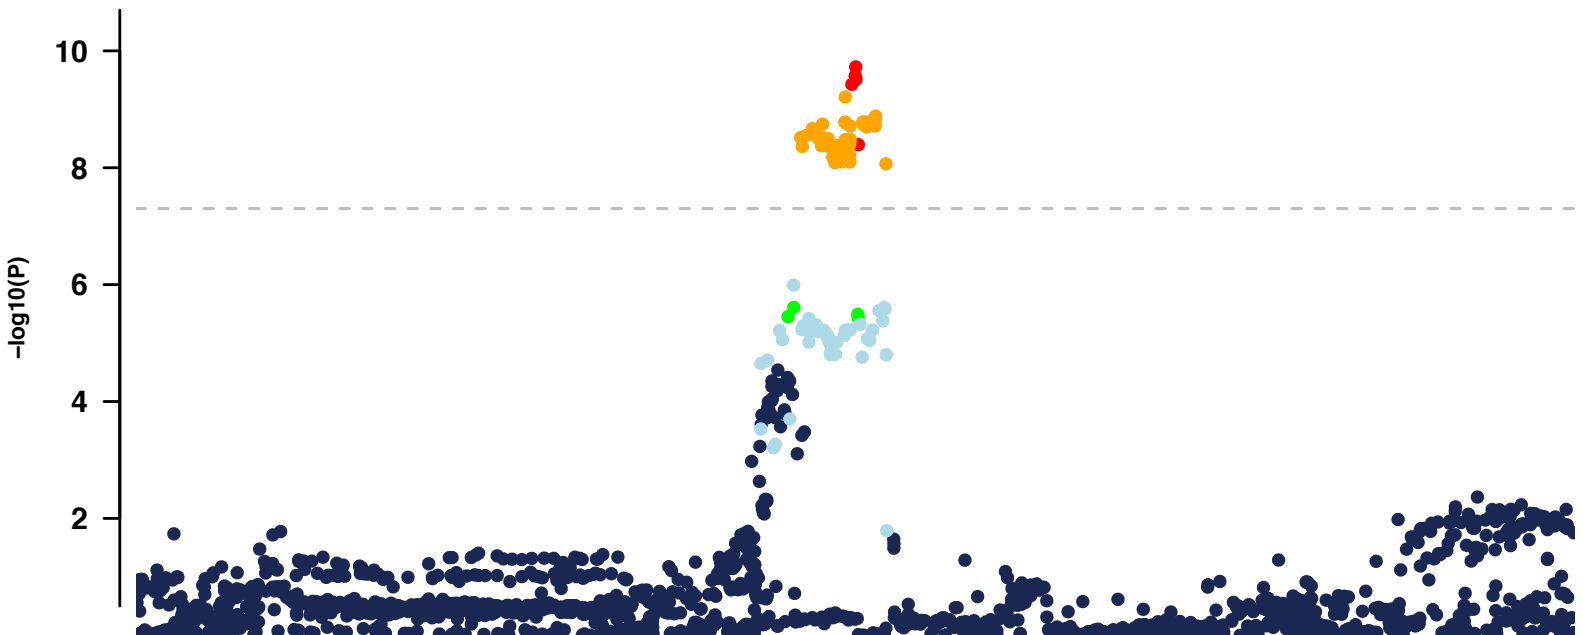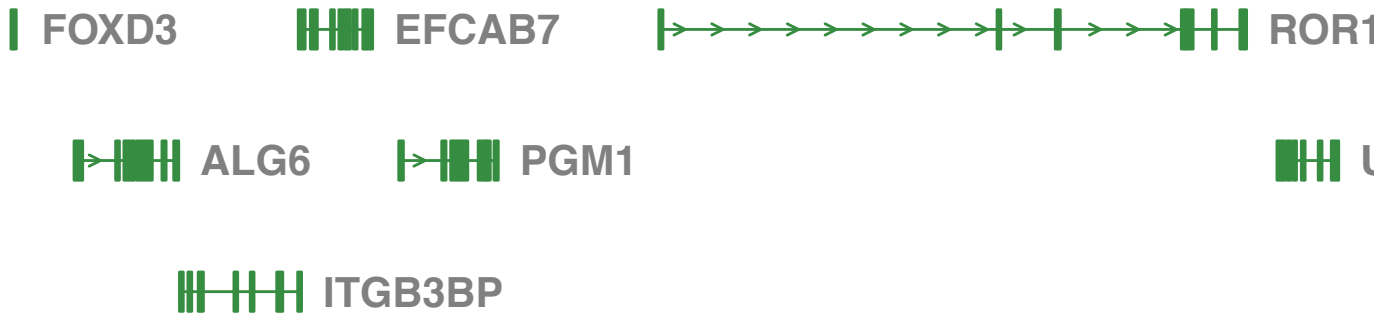

HGE

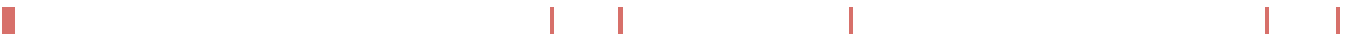

# Mean\_rostralmiddlefrontal\_surfvag: rs1165645

Chromosome 3

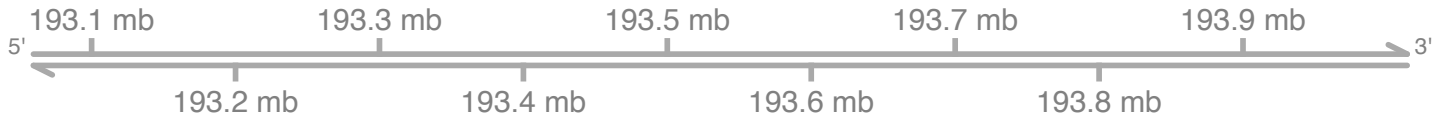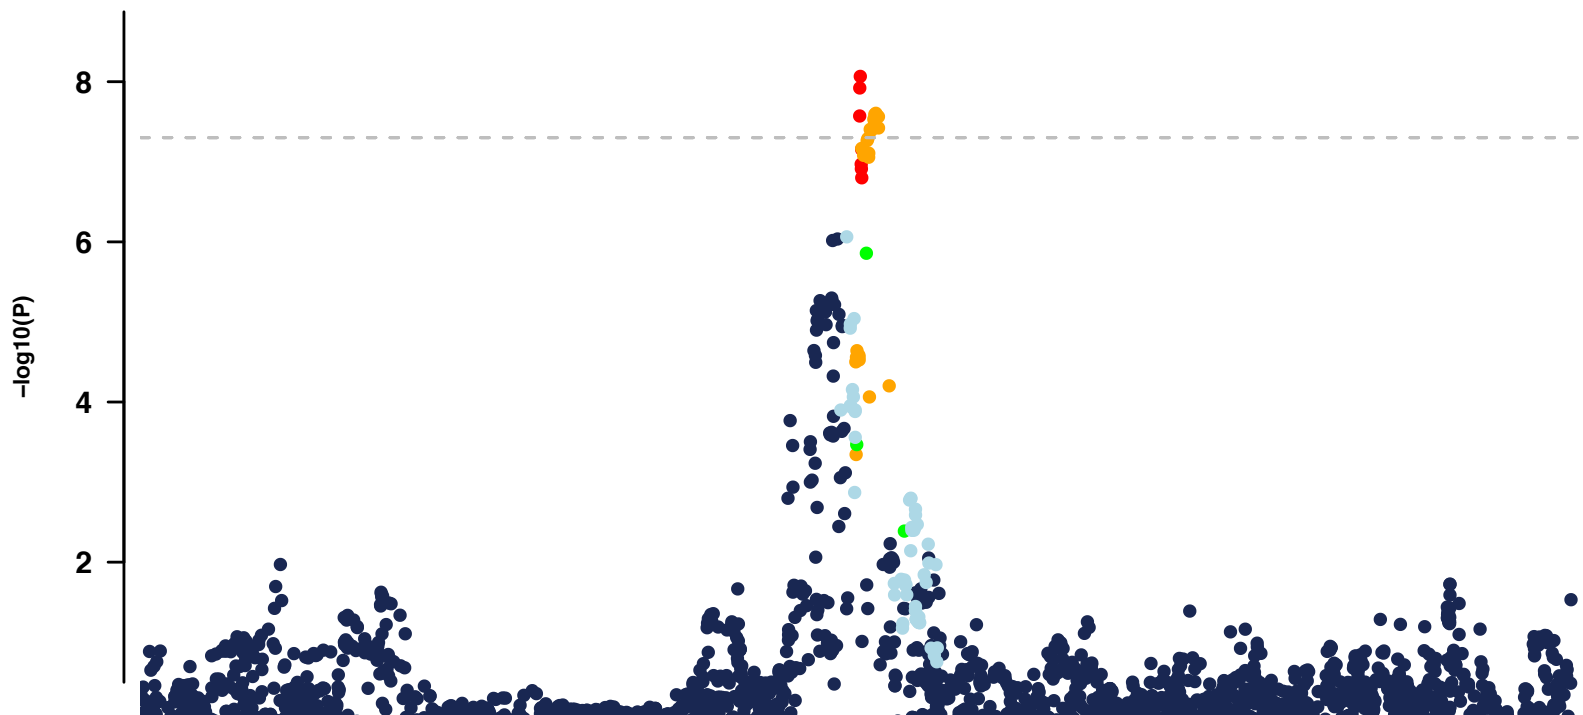

ATP13A5

OPA1

HES1

ATP13A4

HGE

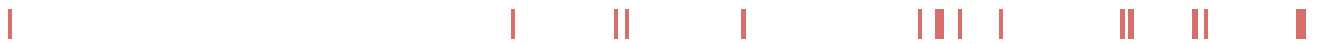

# Mean\_rostralanteriorcingulate\_surfavg: rs2202895

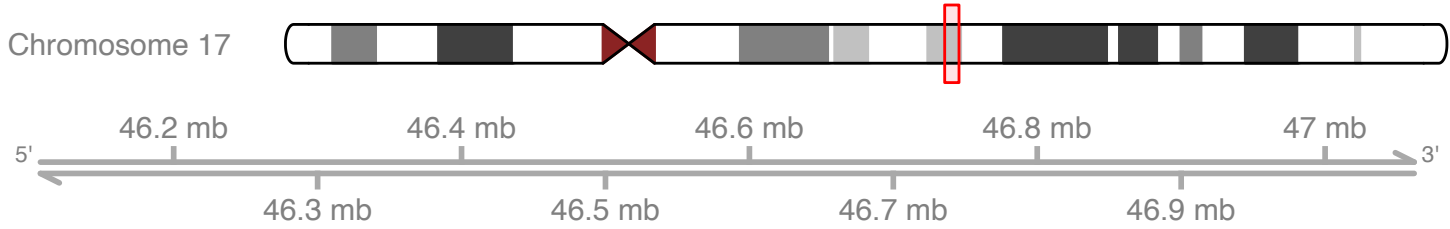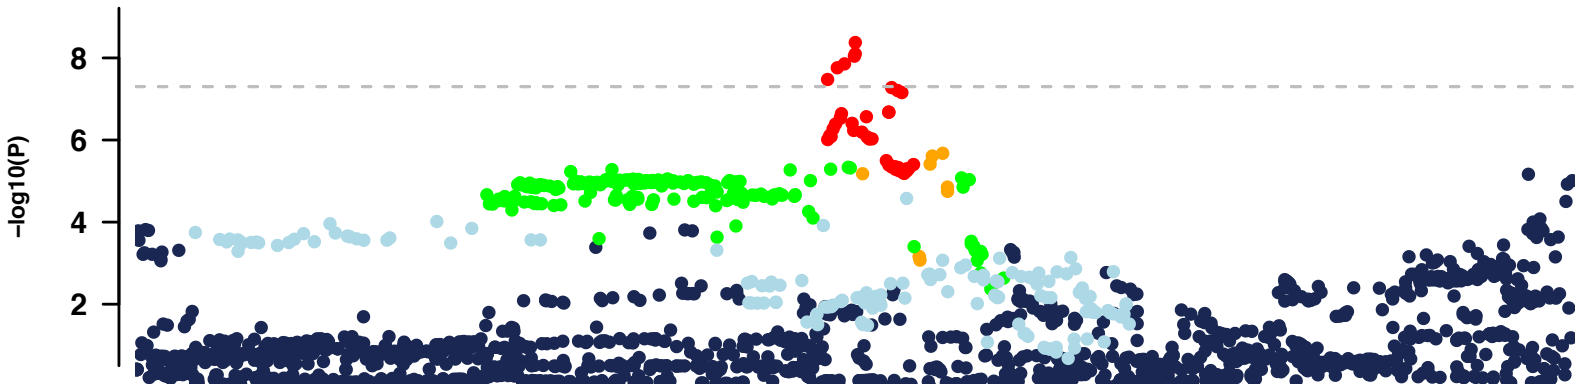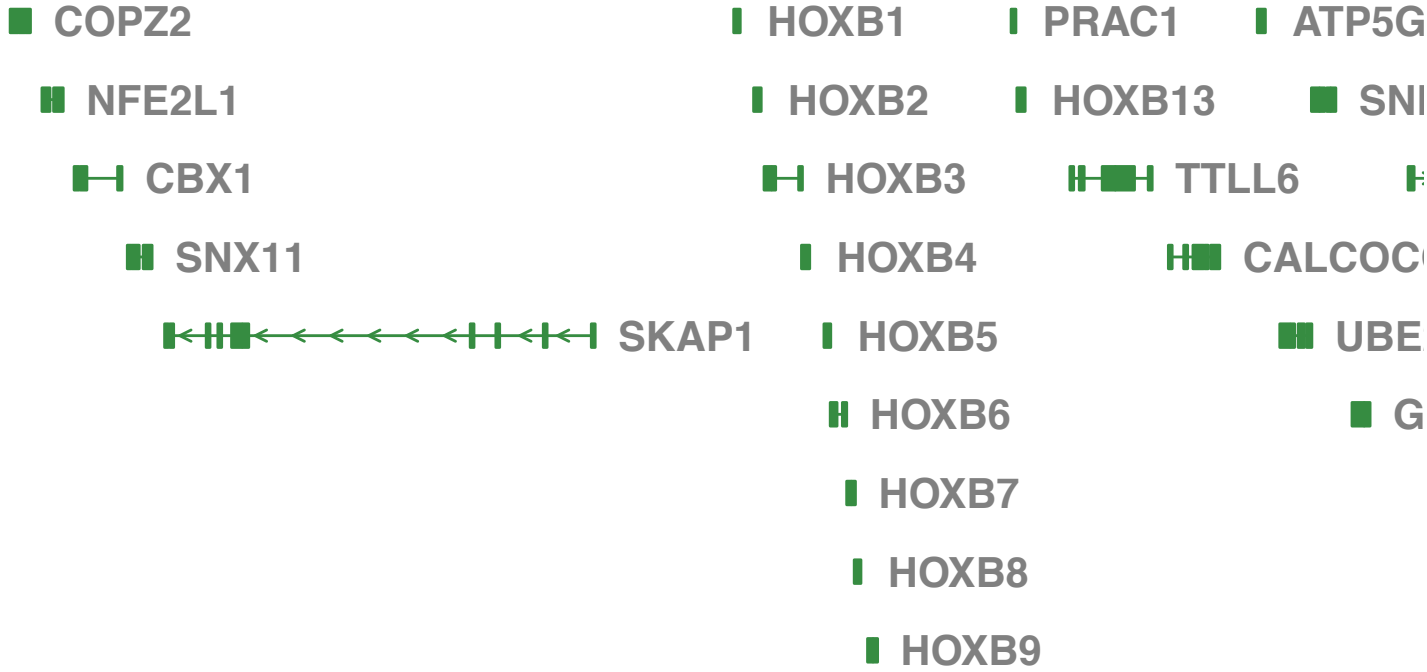

HGE

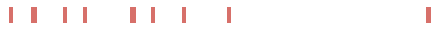

### Mean\_precuneus\_surfvag: rs4811601

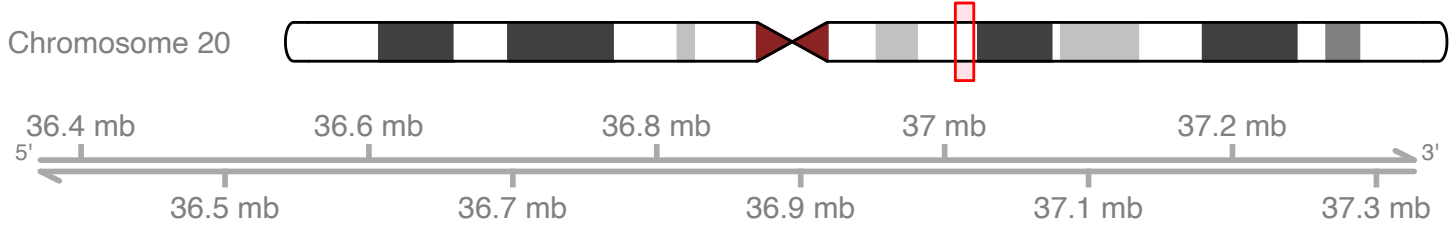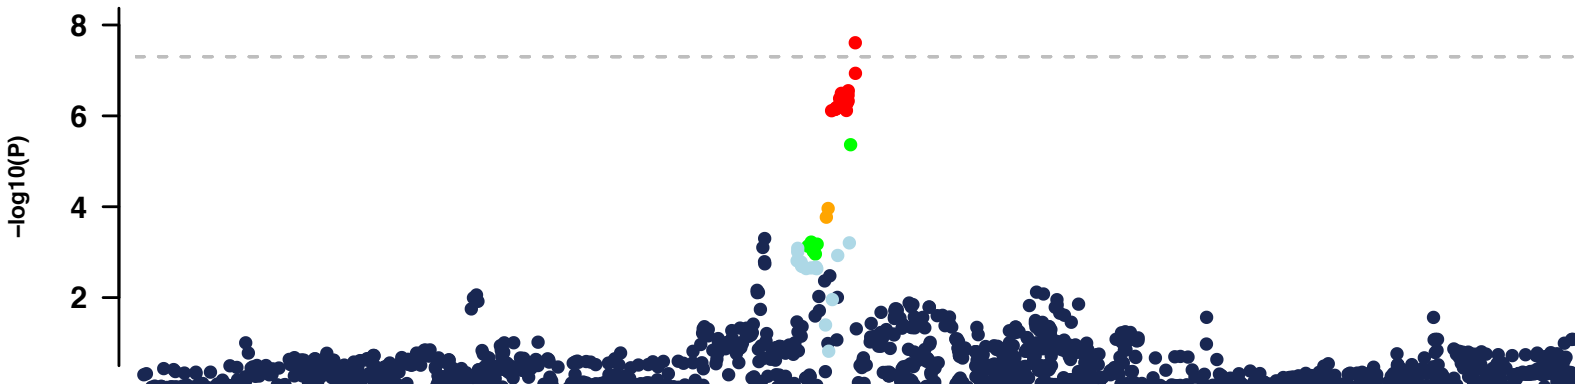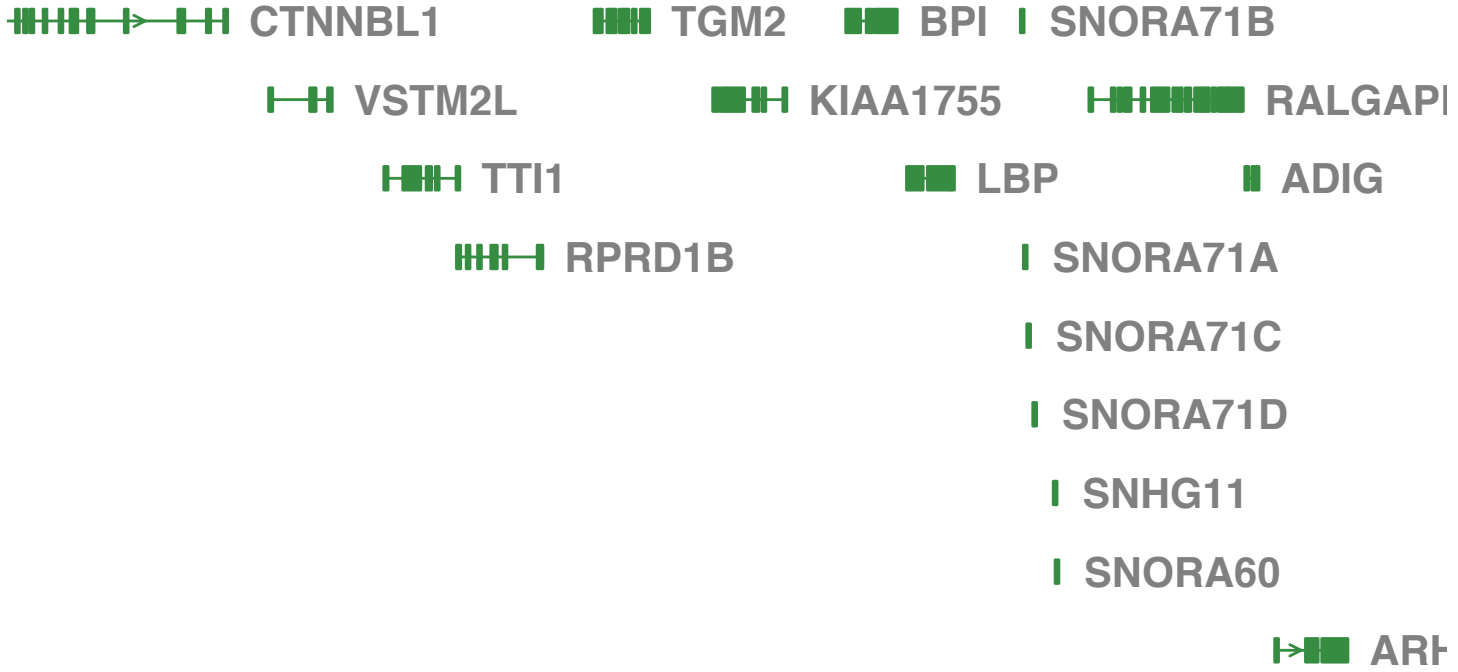

HGE

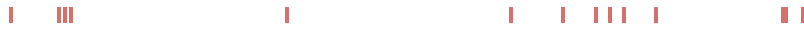

Mean\_precentral\_surfvag: rs4794859

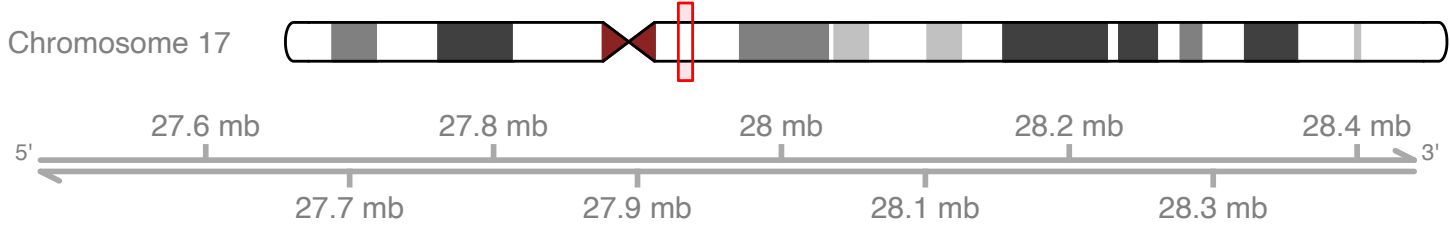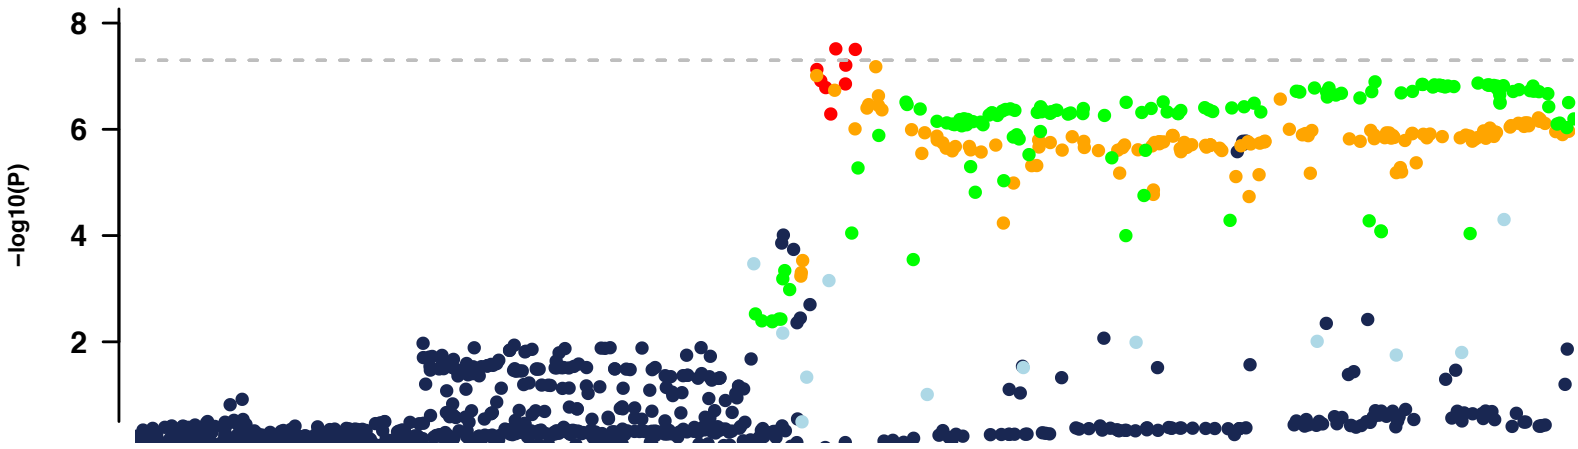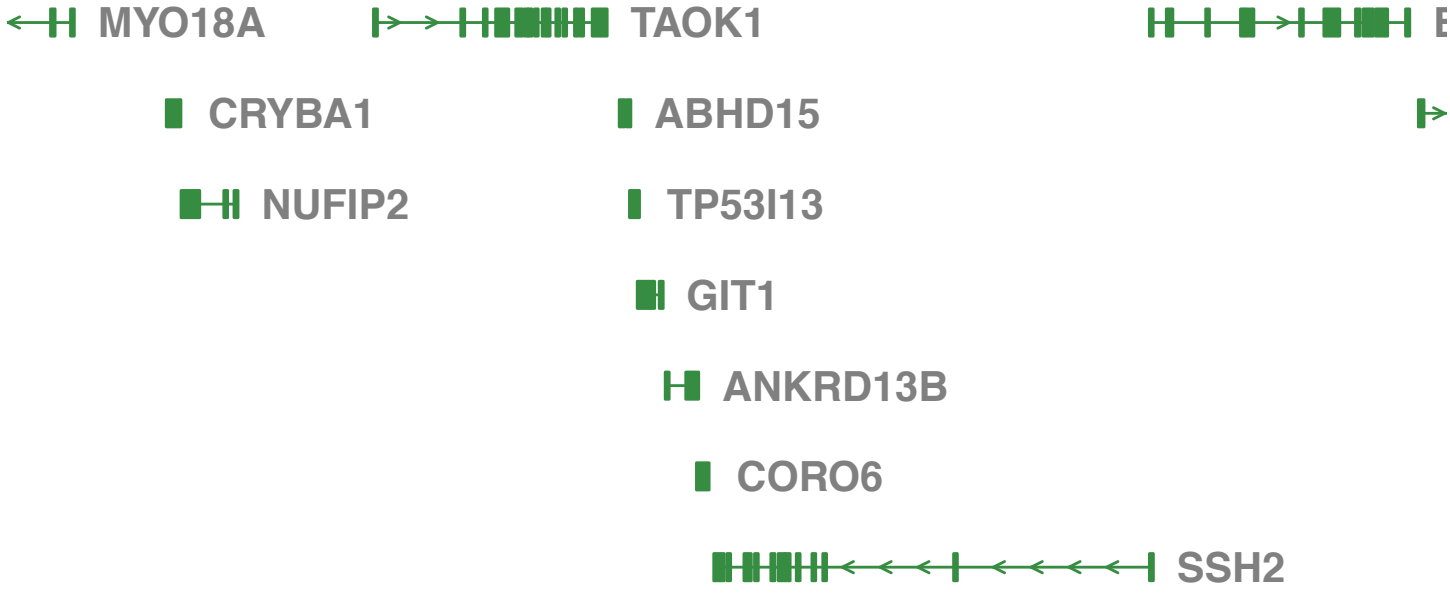

HGE

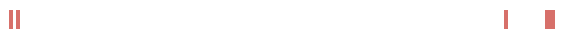

Mean\_precentral\_surfvag: rs62005276

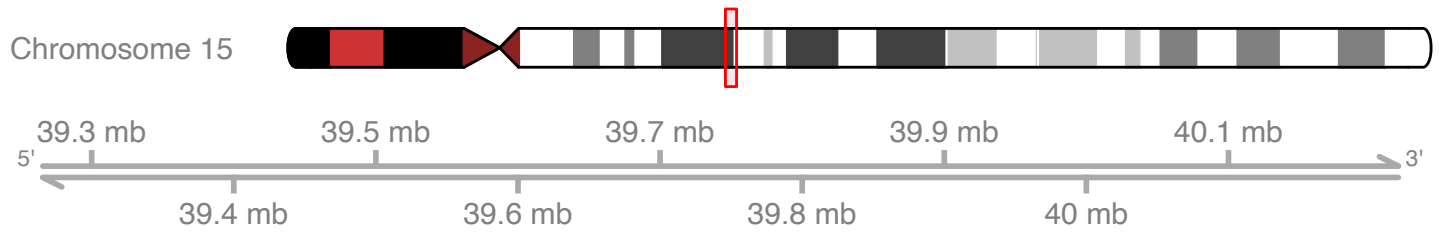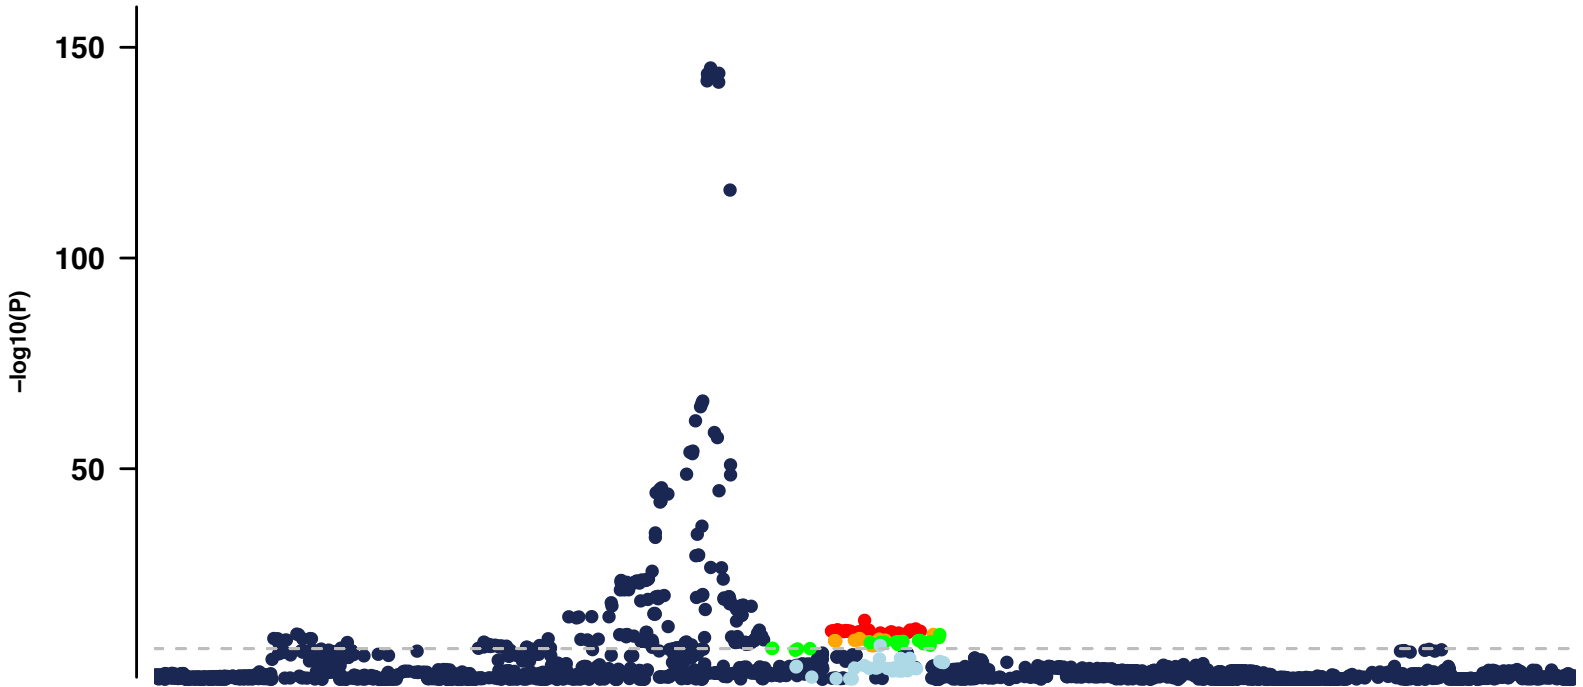

C15orf54

THBS1

G

FSIP1

HGE

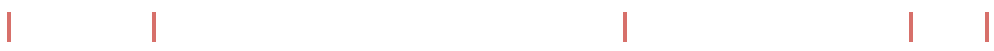

# Mean\_postcentral\_surfavg: rs10032190

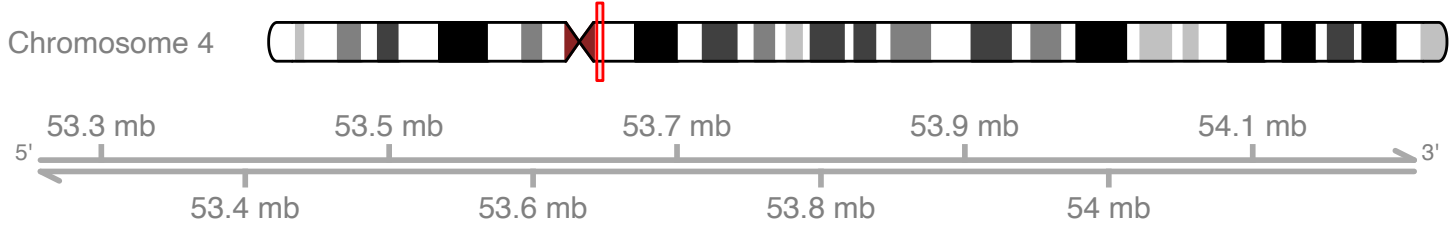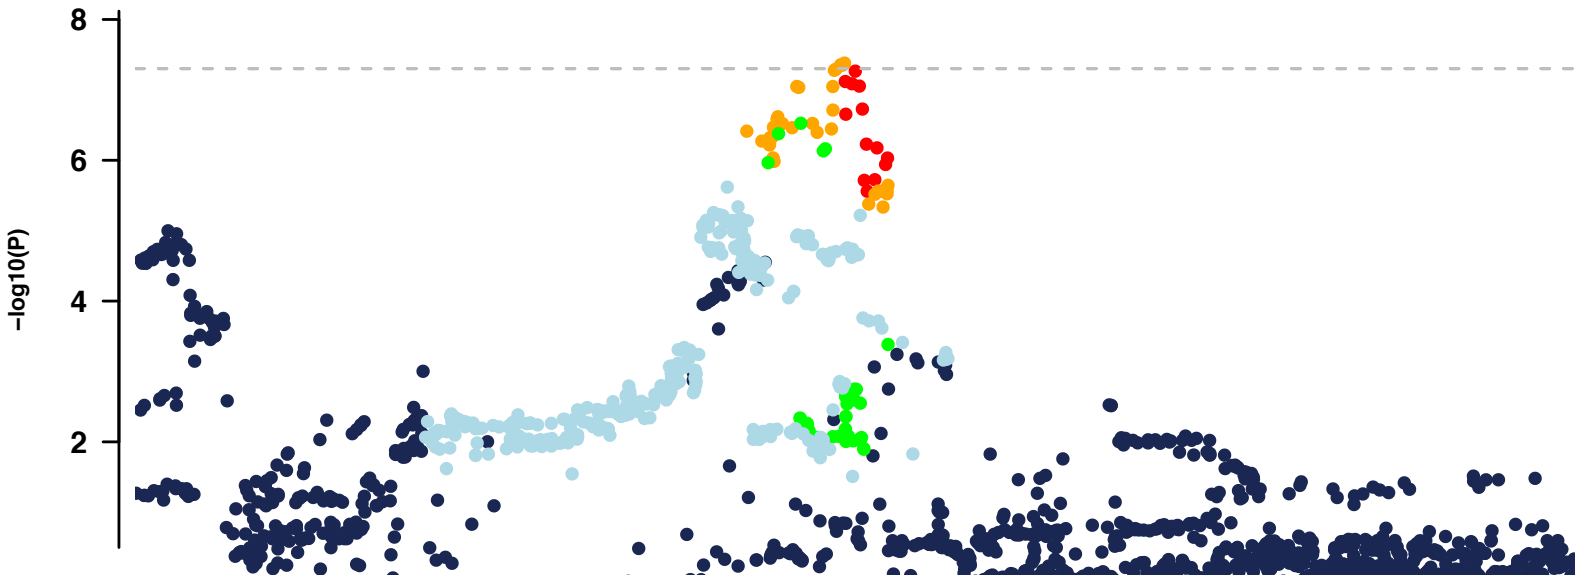

USP46

RASL11B

SNORA26

ERVMER34-1

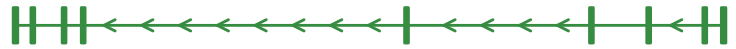

HGE

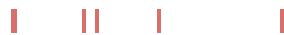

# Mean\_postcentral\_surfvag: rs58119373

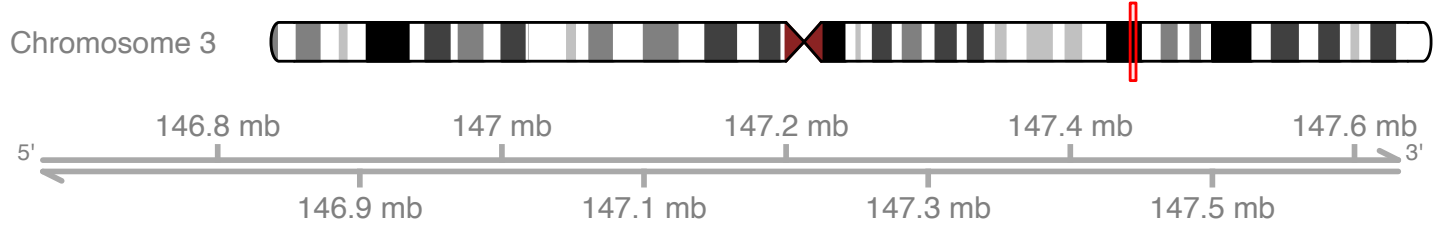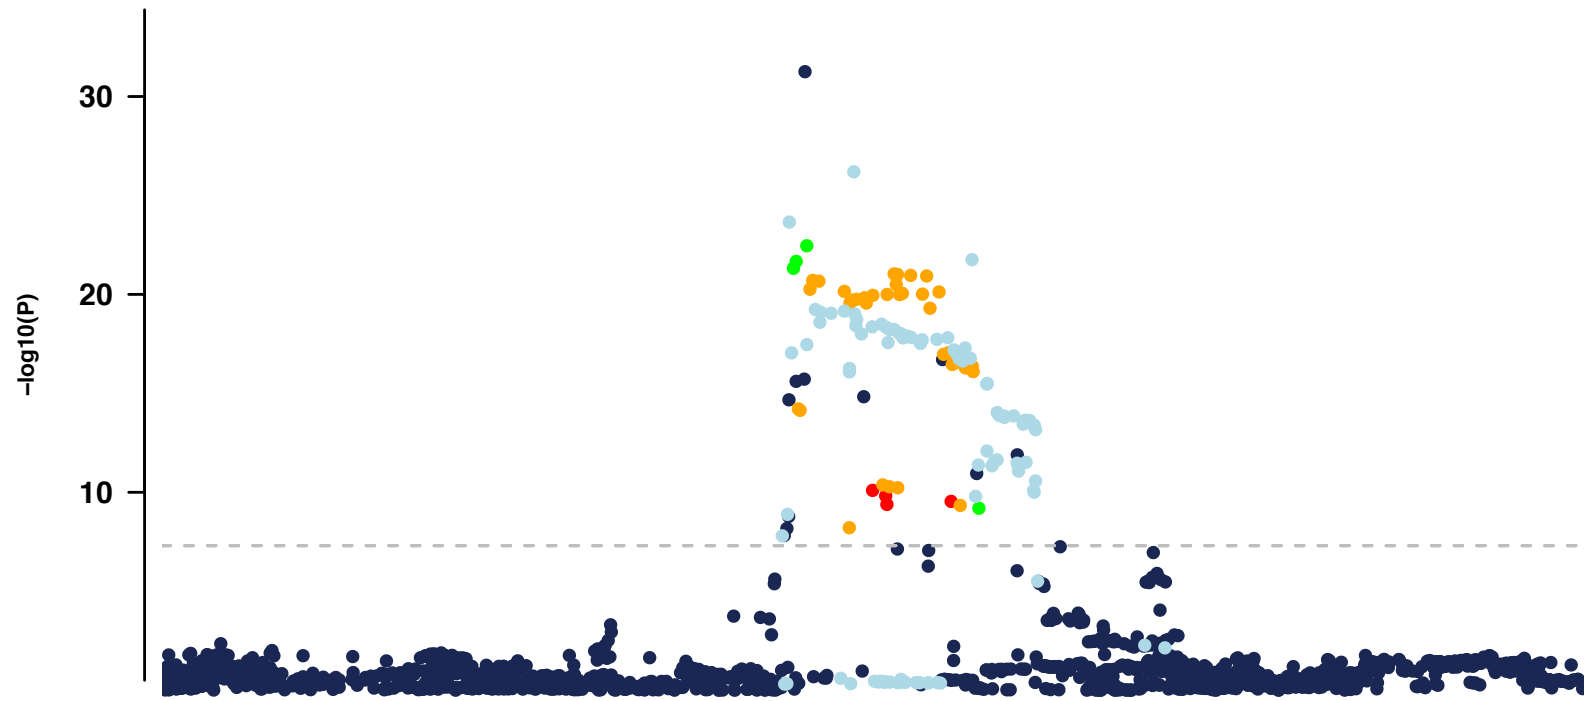

ZIC4

ZIC1

HGE

|

||

|



# Mean\_postcentral\_surfav: rs2279829

Chromosome 3

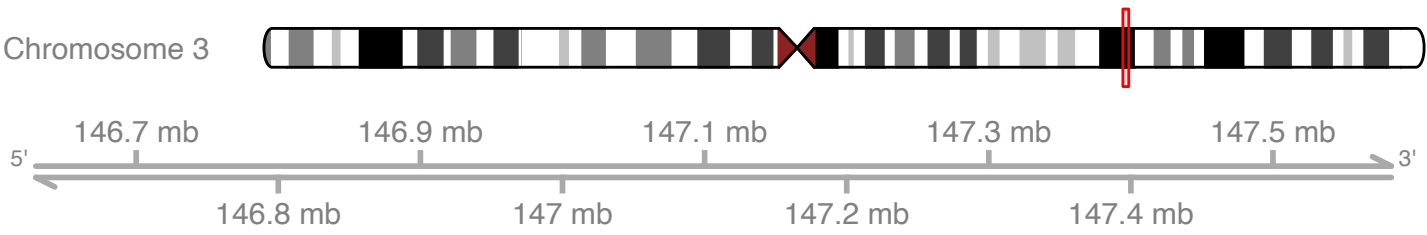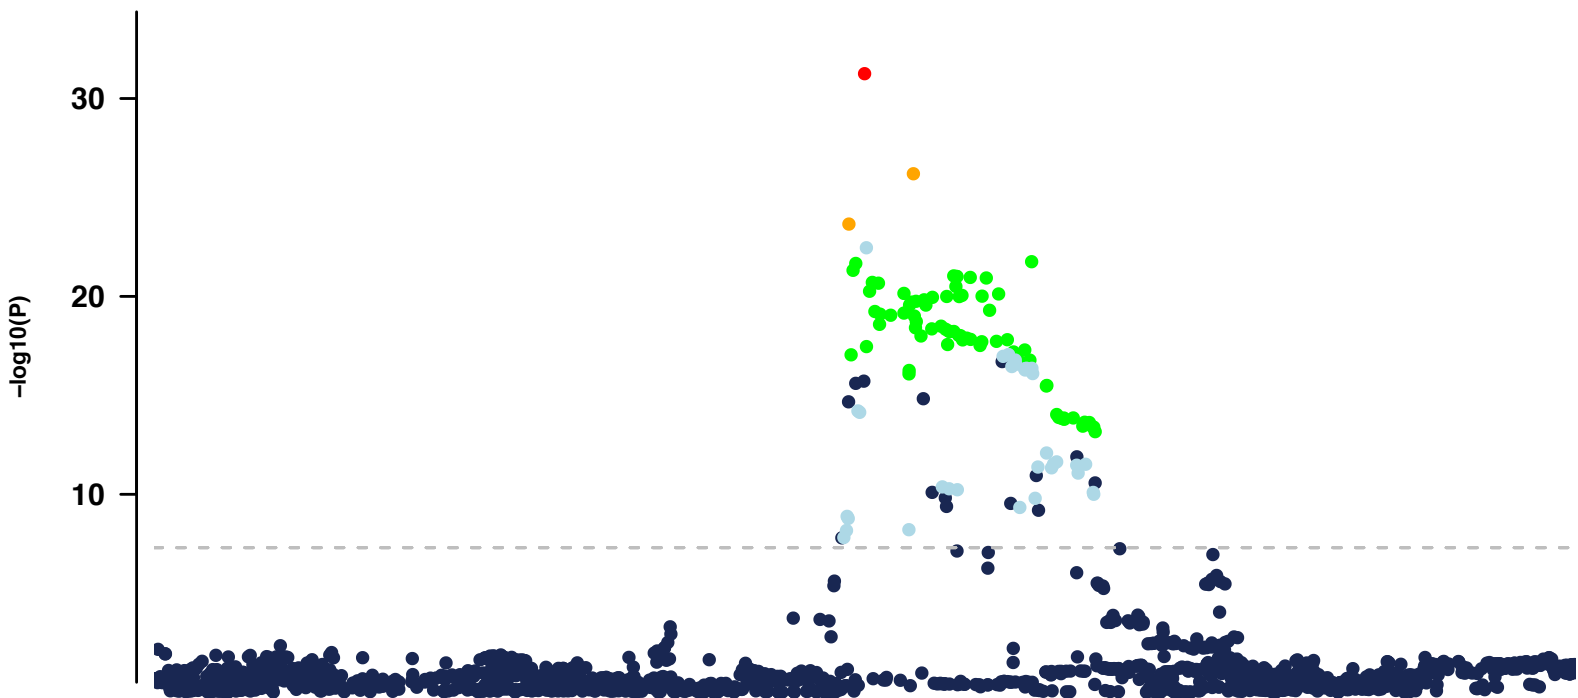

ZIC4

ZIC1

HGE

|

||

|

# Mean\_postcentral\_surfav: rs2279830

Chromosome 3

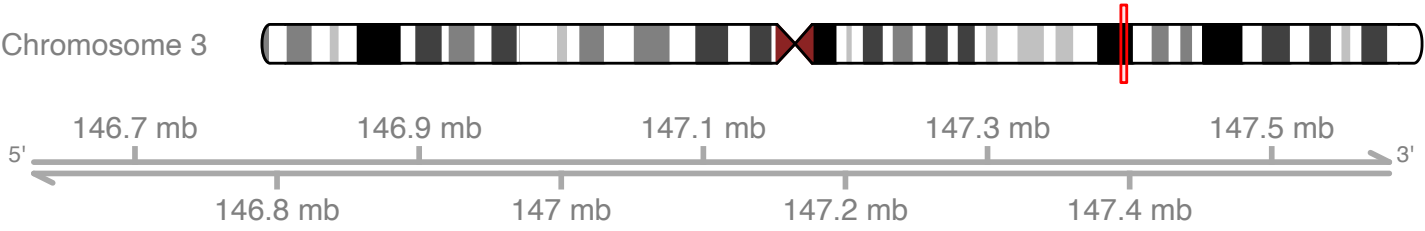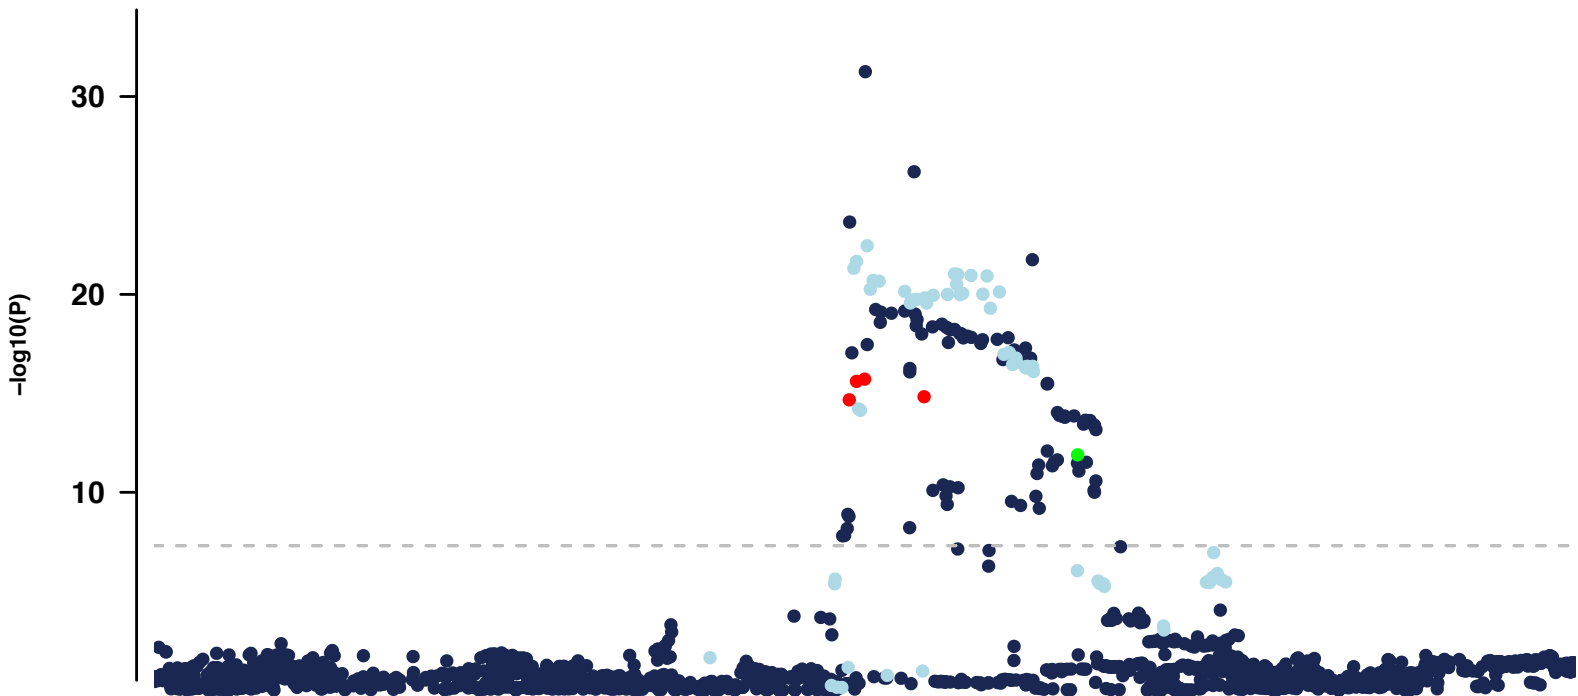

ZIC4

ZIC1

HGE

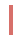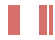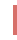

# Mean\_pericalcarine\_surfvag: rs28633576

Chromosome 9

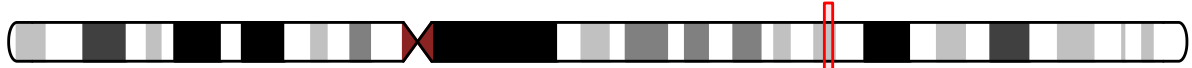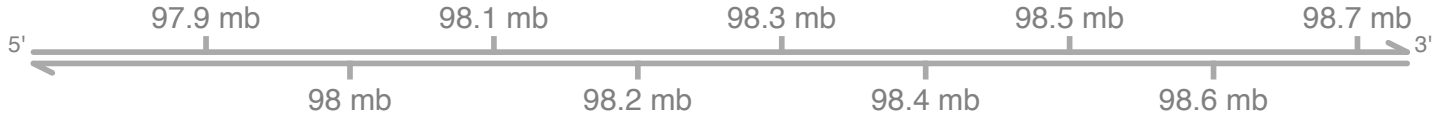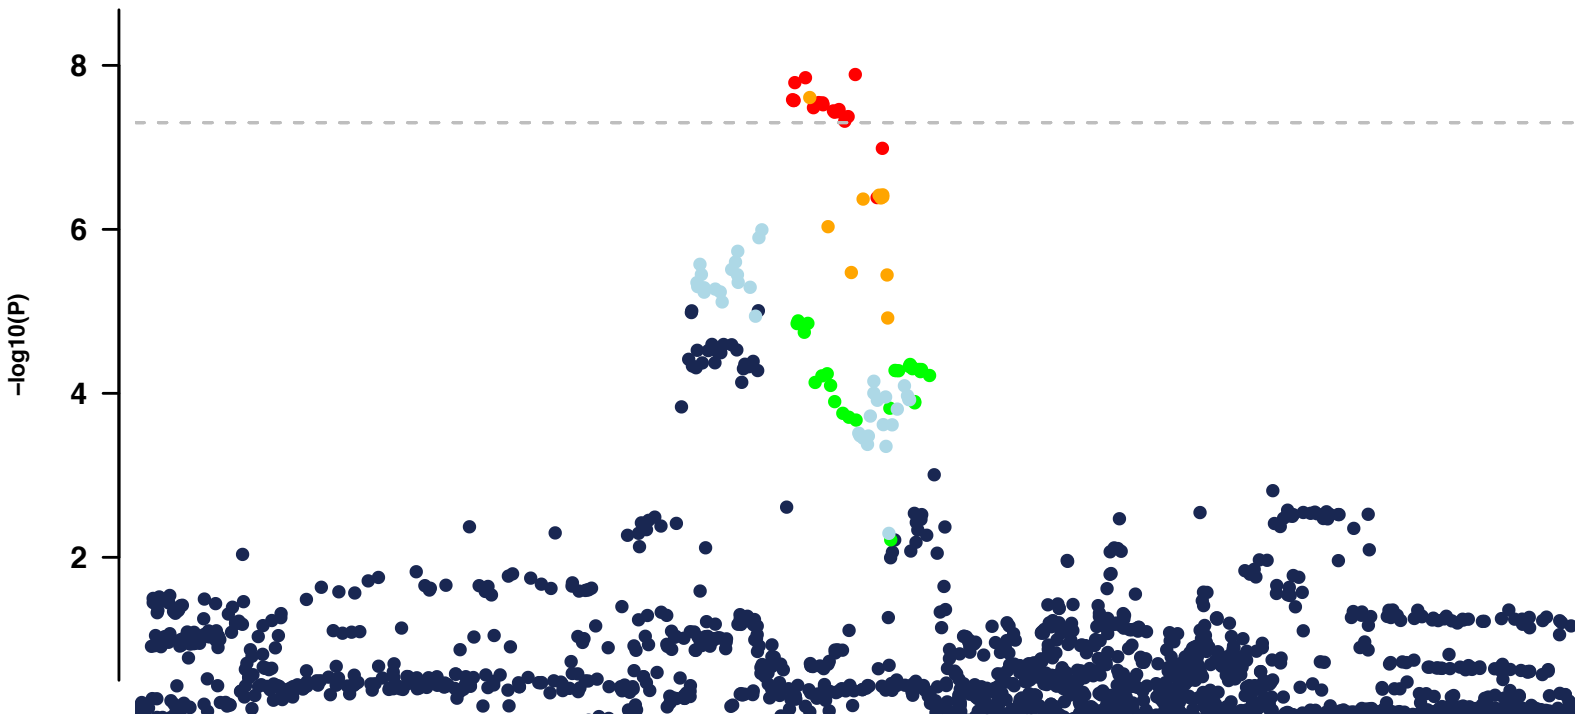

C9orf3

PTCH1

E

FANCC

HGE

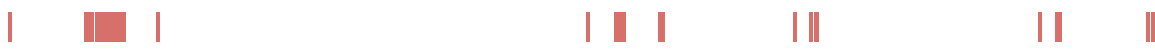

# Mean\_pericalcarine\_surfvag: rs983741

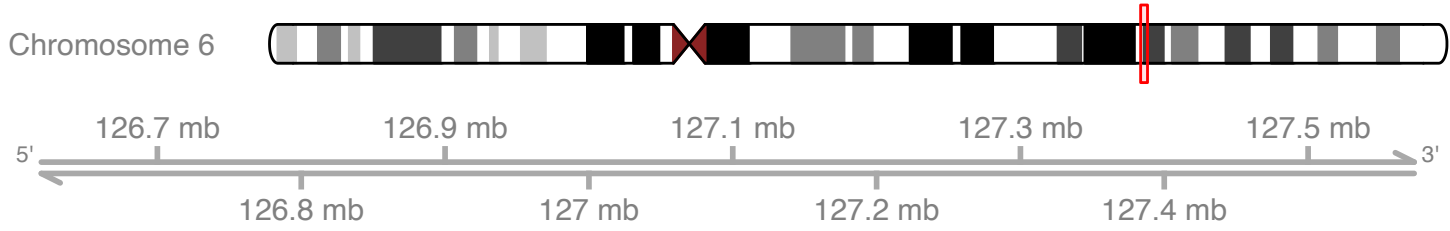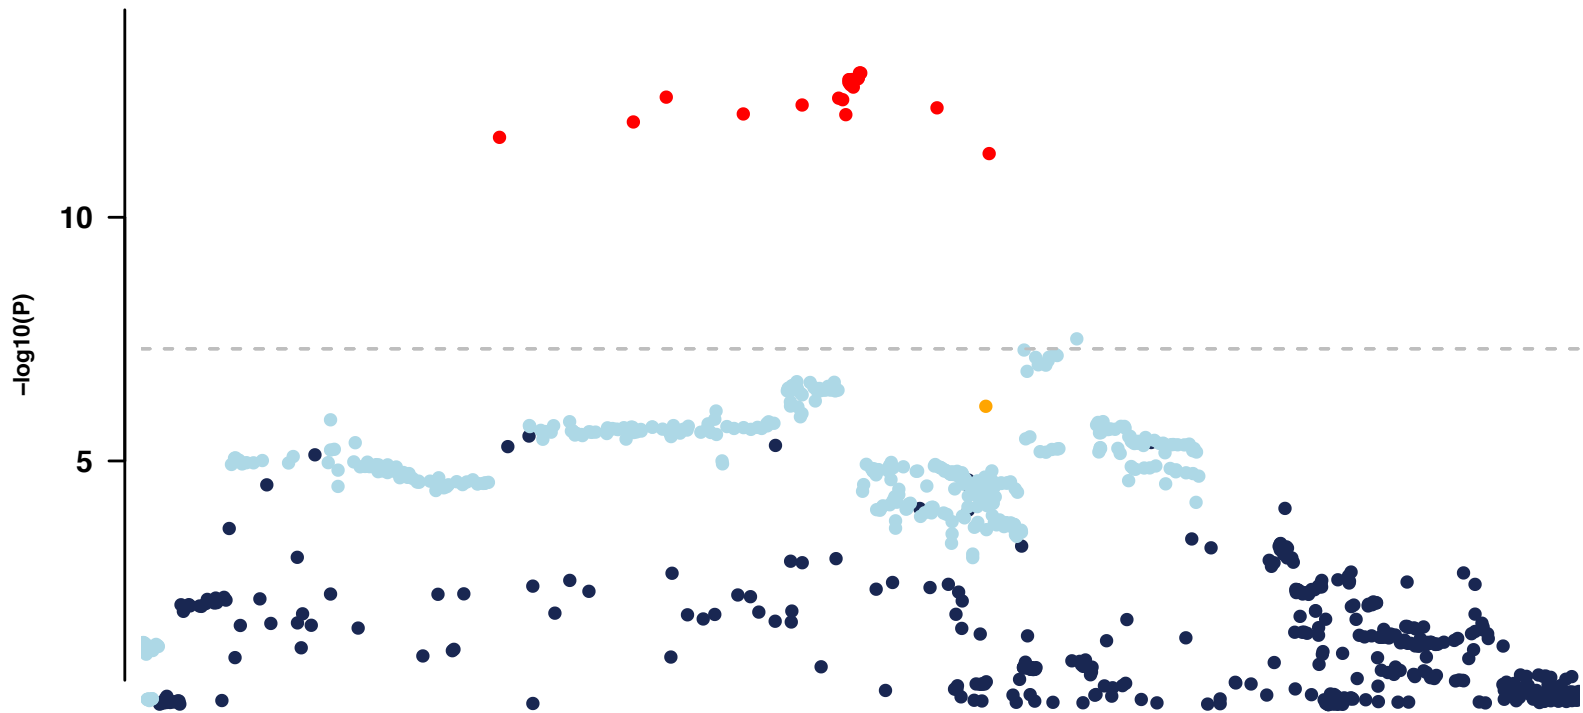

CENPW

RSP

HGE

|

# Mean\_pericalcarine\_suravg: rs6812278

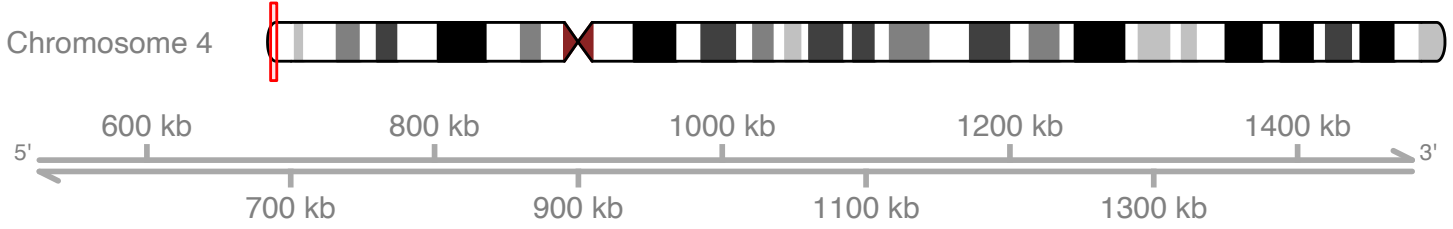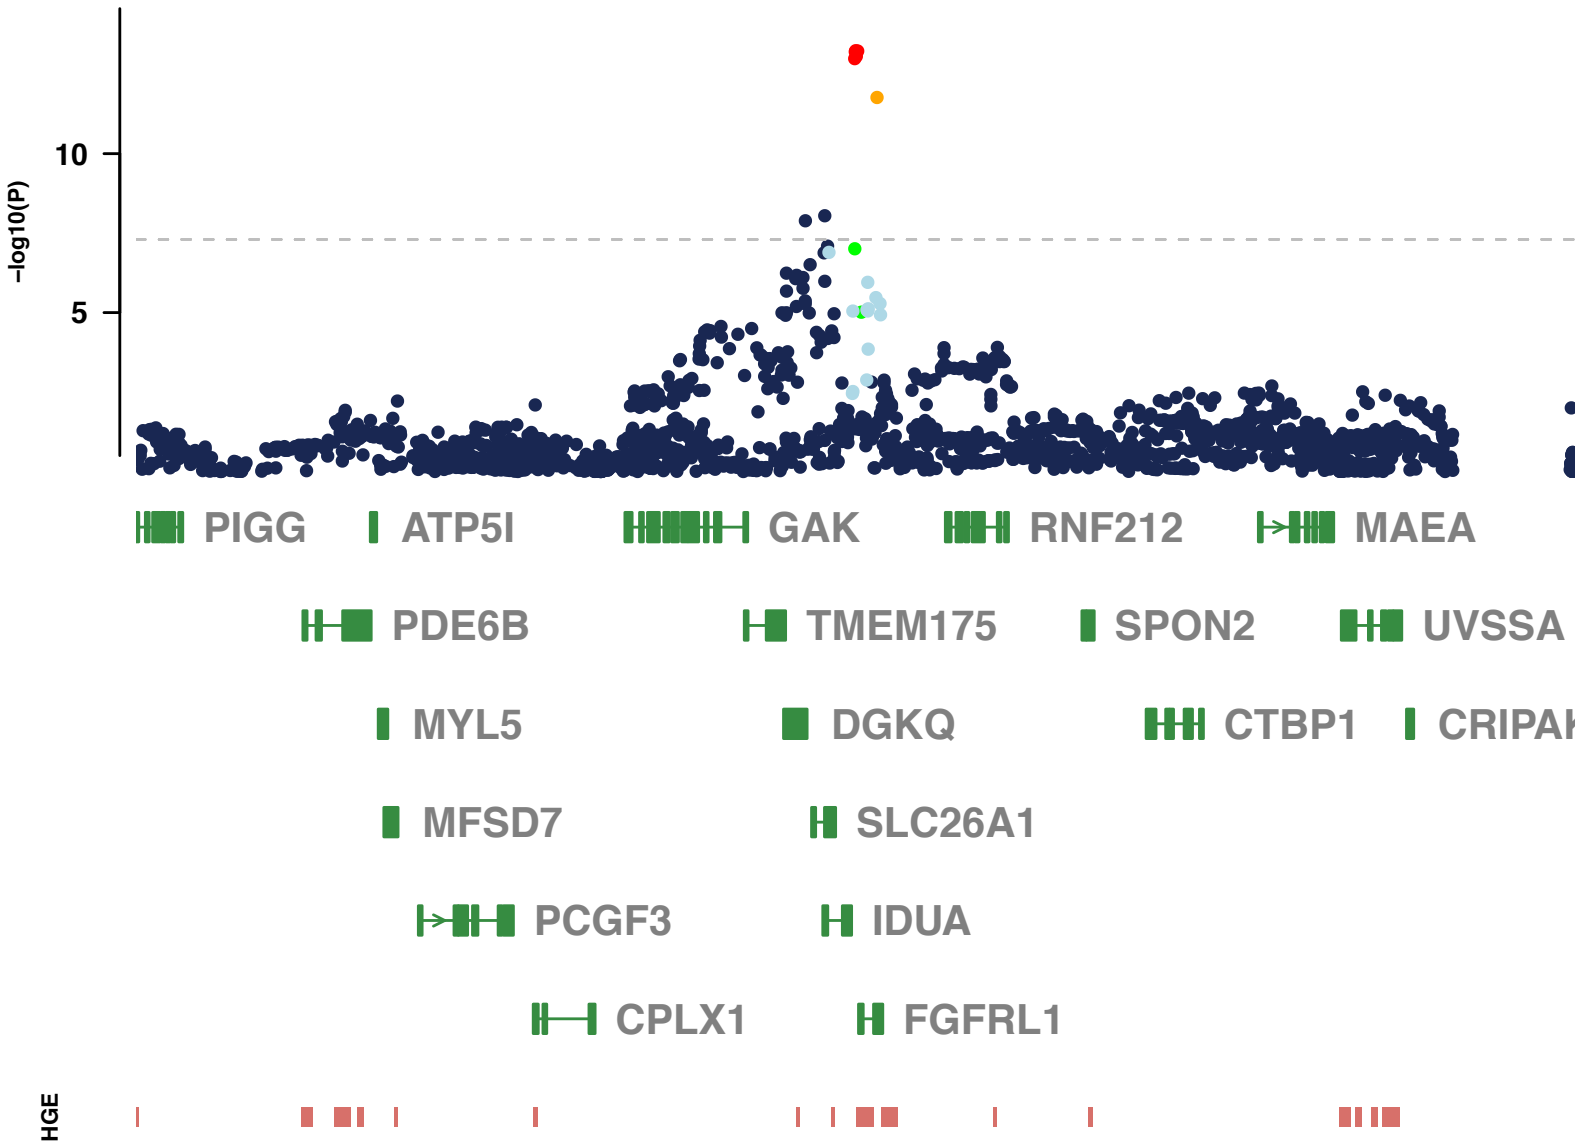

Mean\_pericalcarine\_surfvag: rs11248061

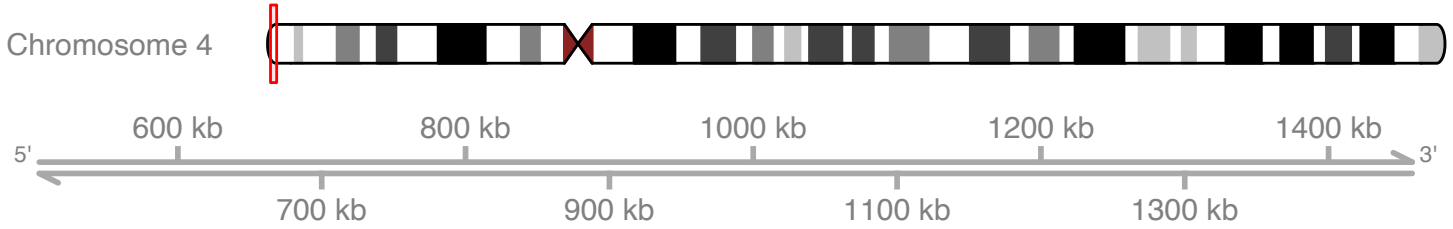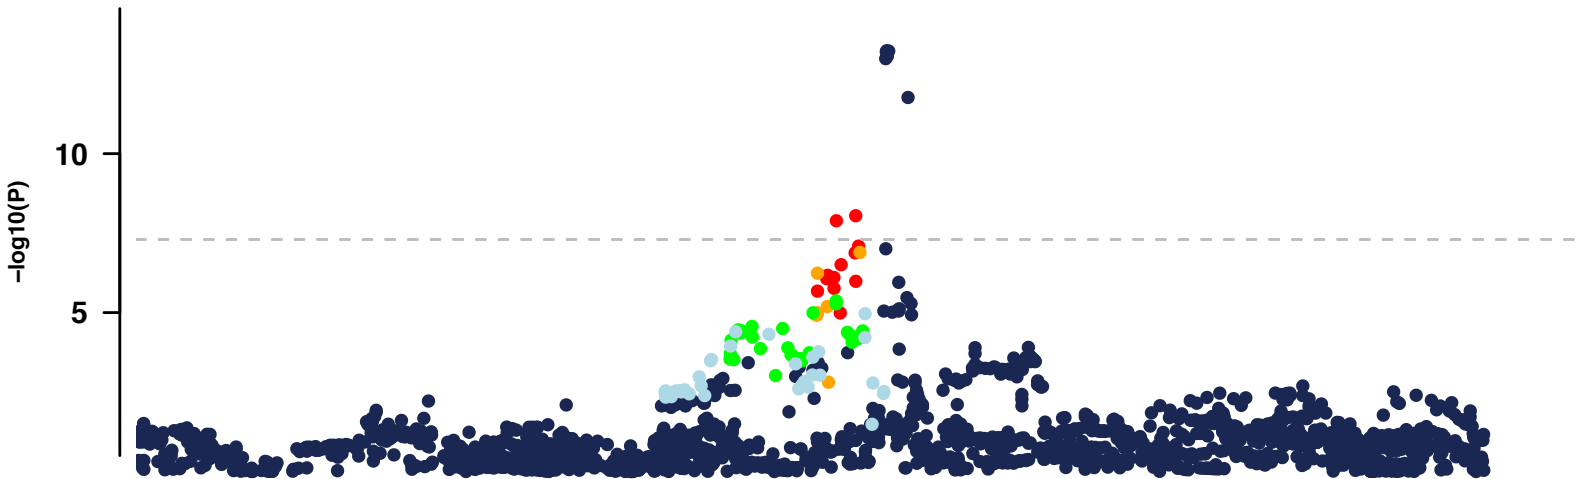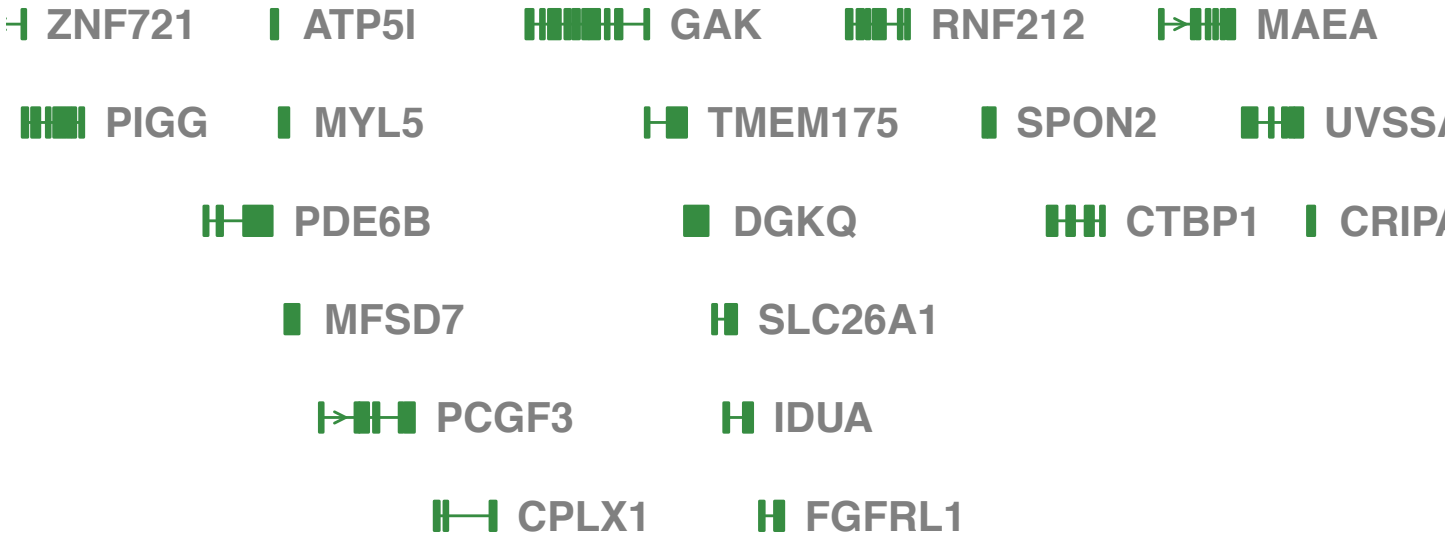

HGE

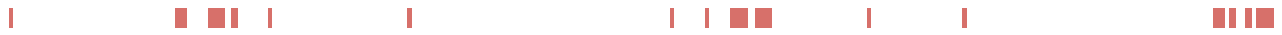

Mean\_pericalcarine\_surfvag: rs16829649

Chromosome 3

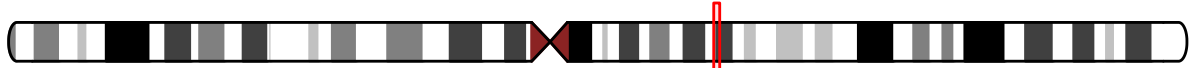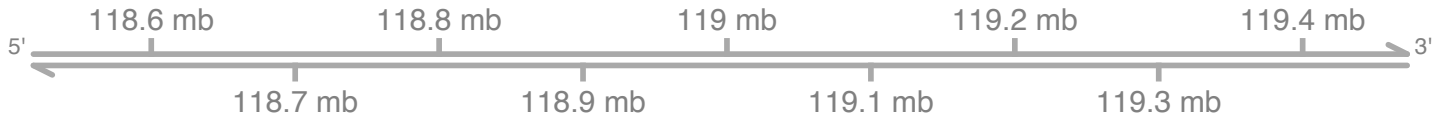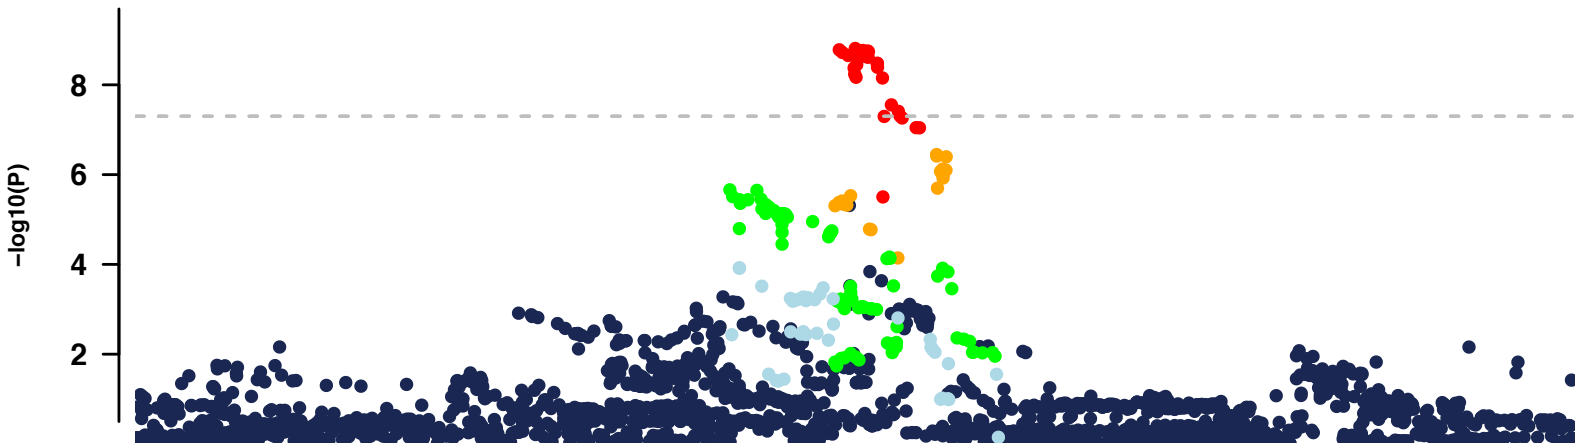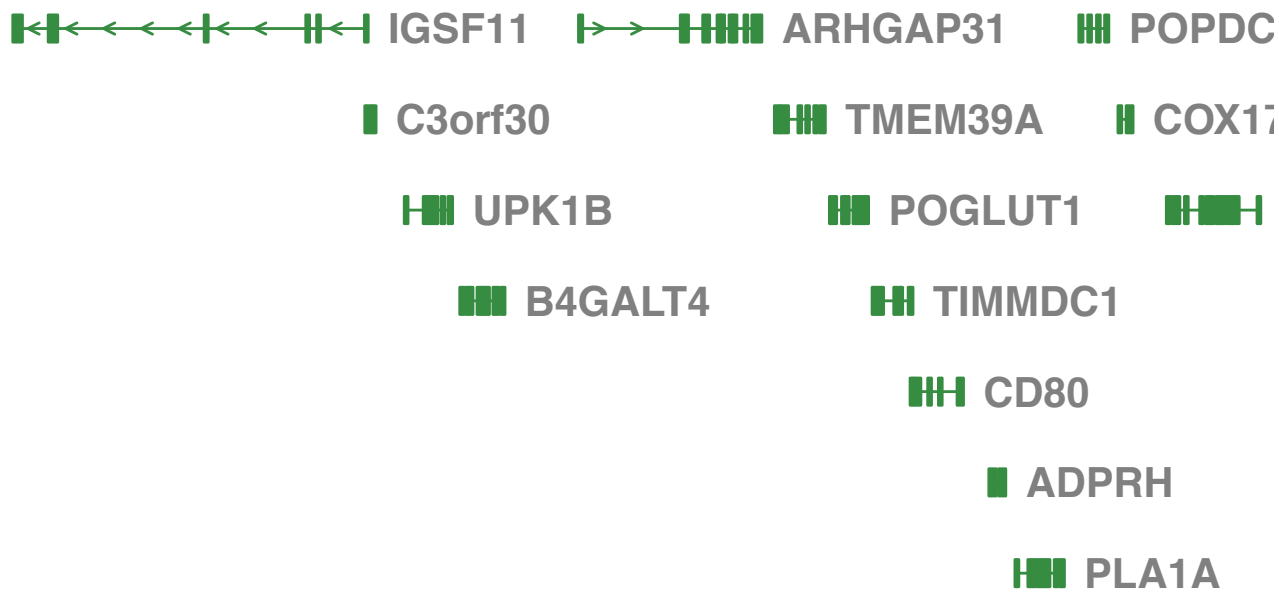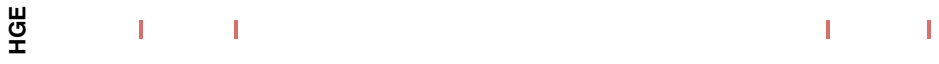

# Mean\_pericalcarine\_surfvag: rs8034885

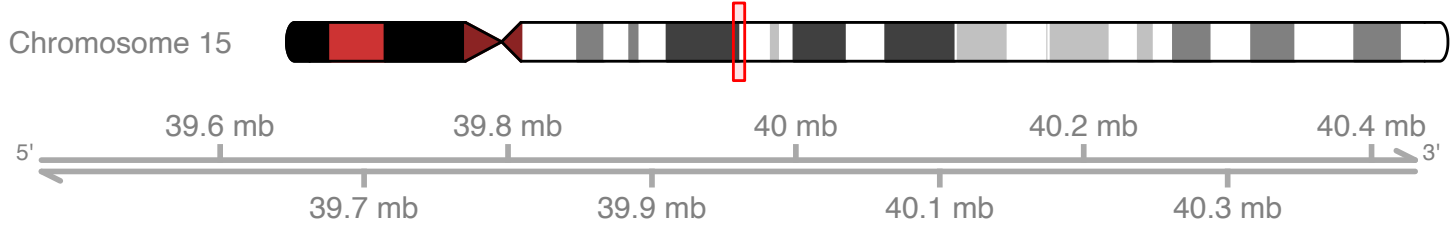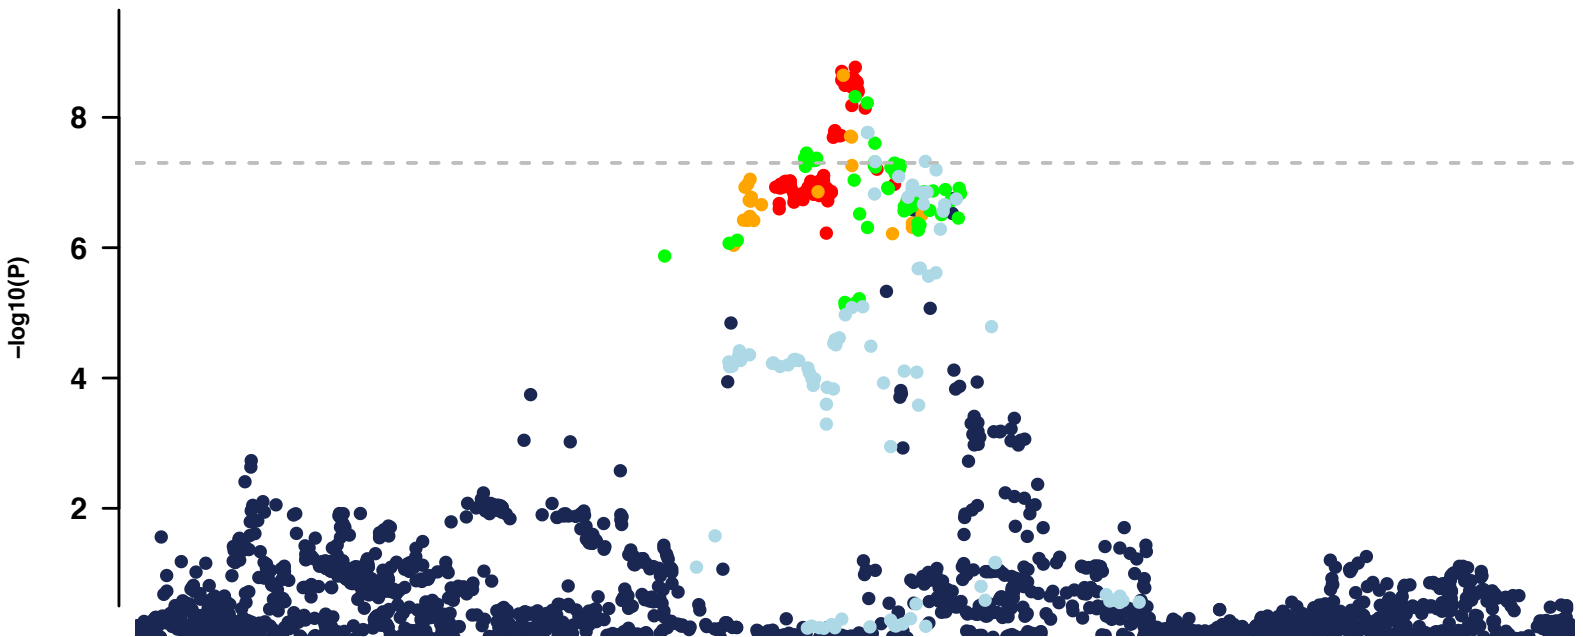

C15orf54

THBS1

GPR176

BM

FSIP1

EIF2AK4

SRP14

HGE

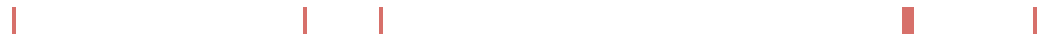



# Mean\_pericalcarine\_surfavg: rs7364475

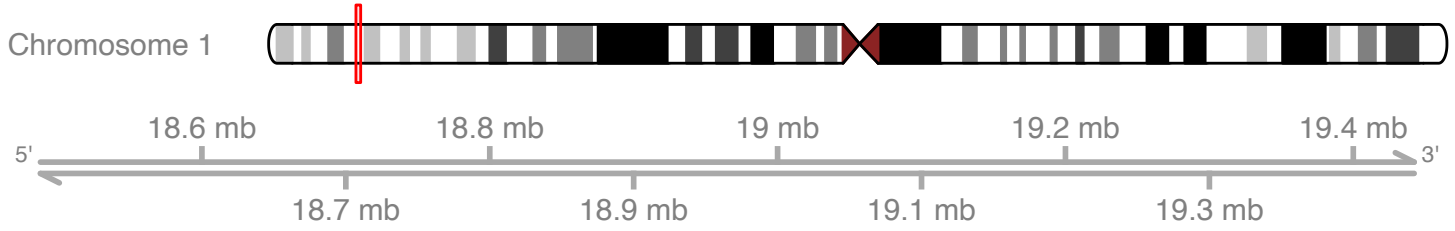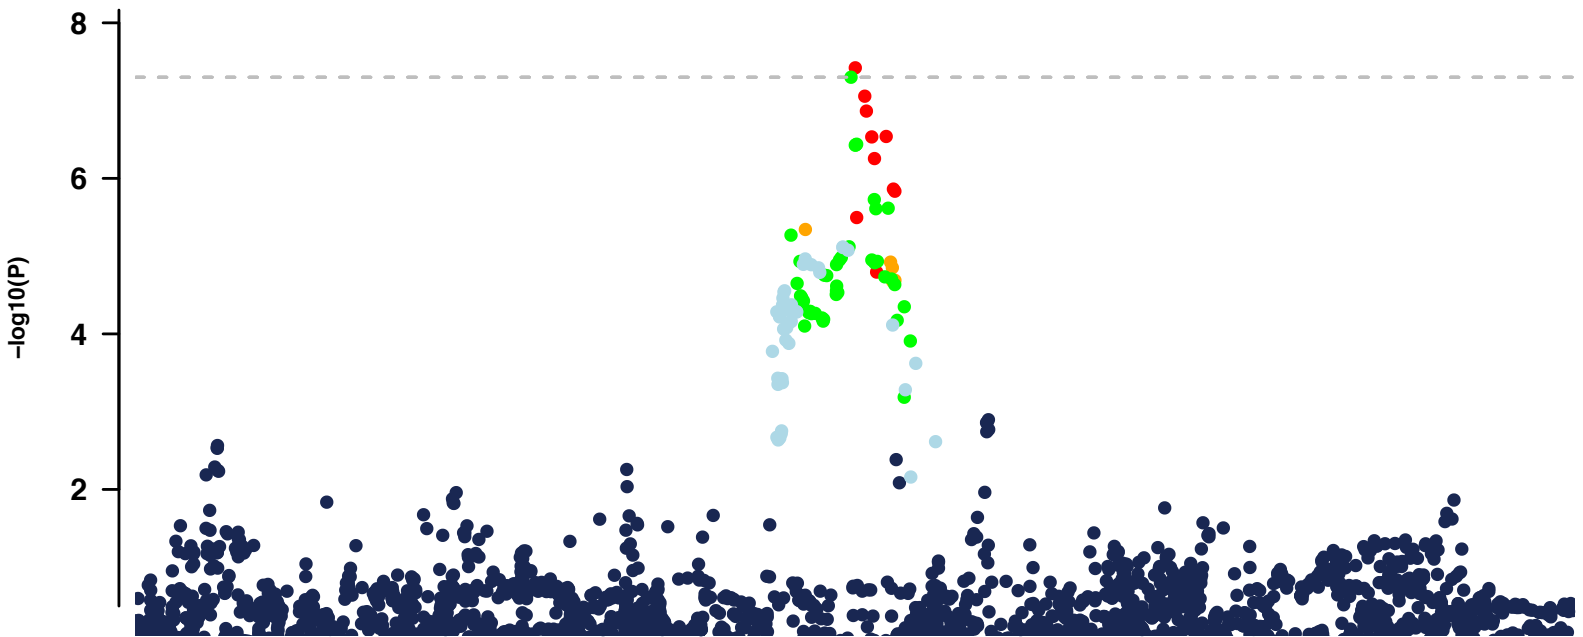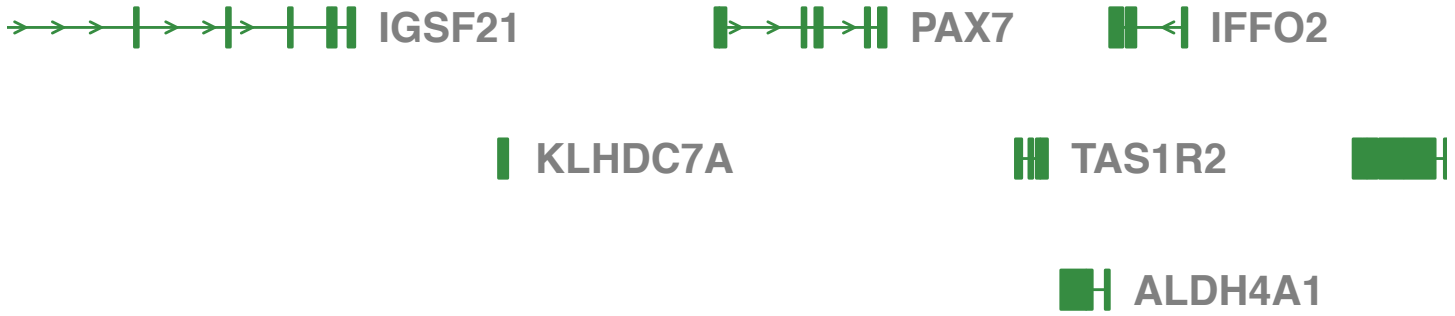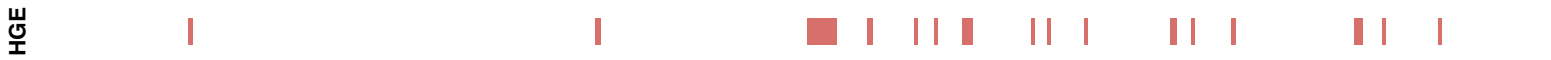

# Mean\_parstriangularis\_surfvag: rs2279829

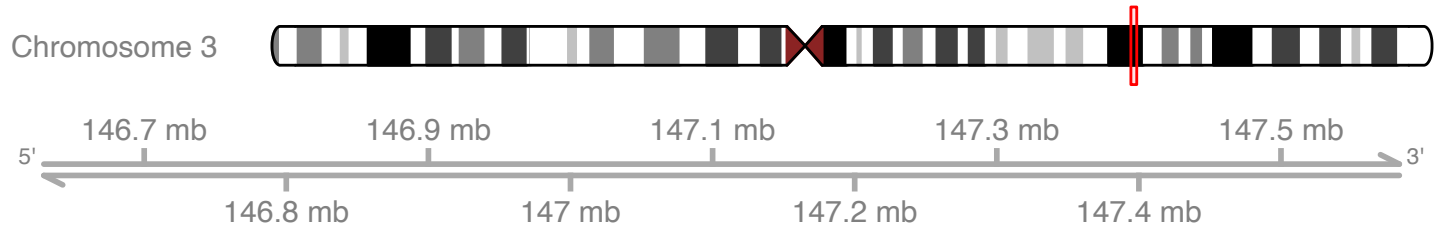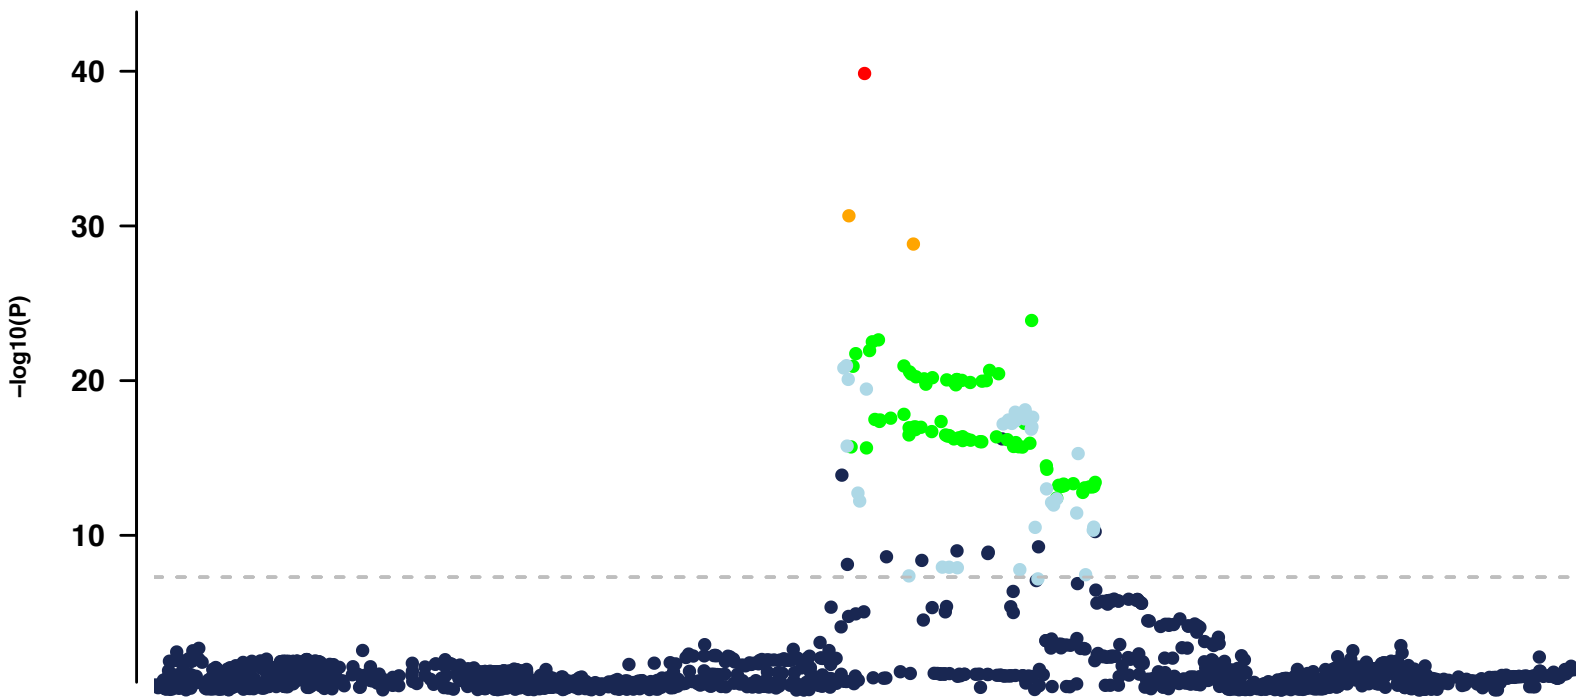

ZIC4

ZIC1

HGE

|

||

|

# Mean\_parsorbitalis\_surfvag: rs1622987

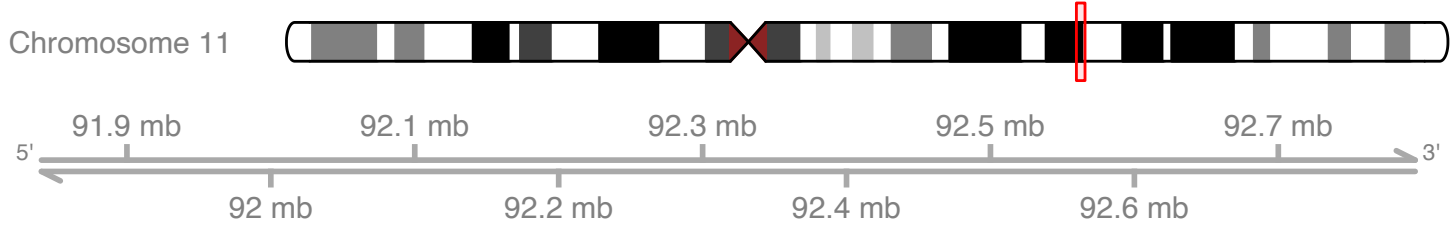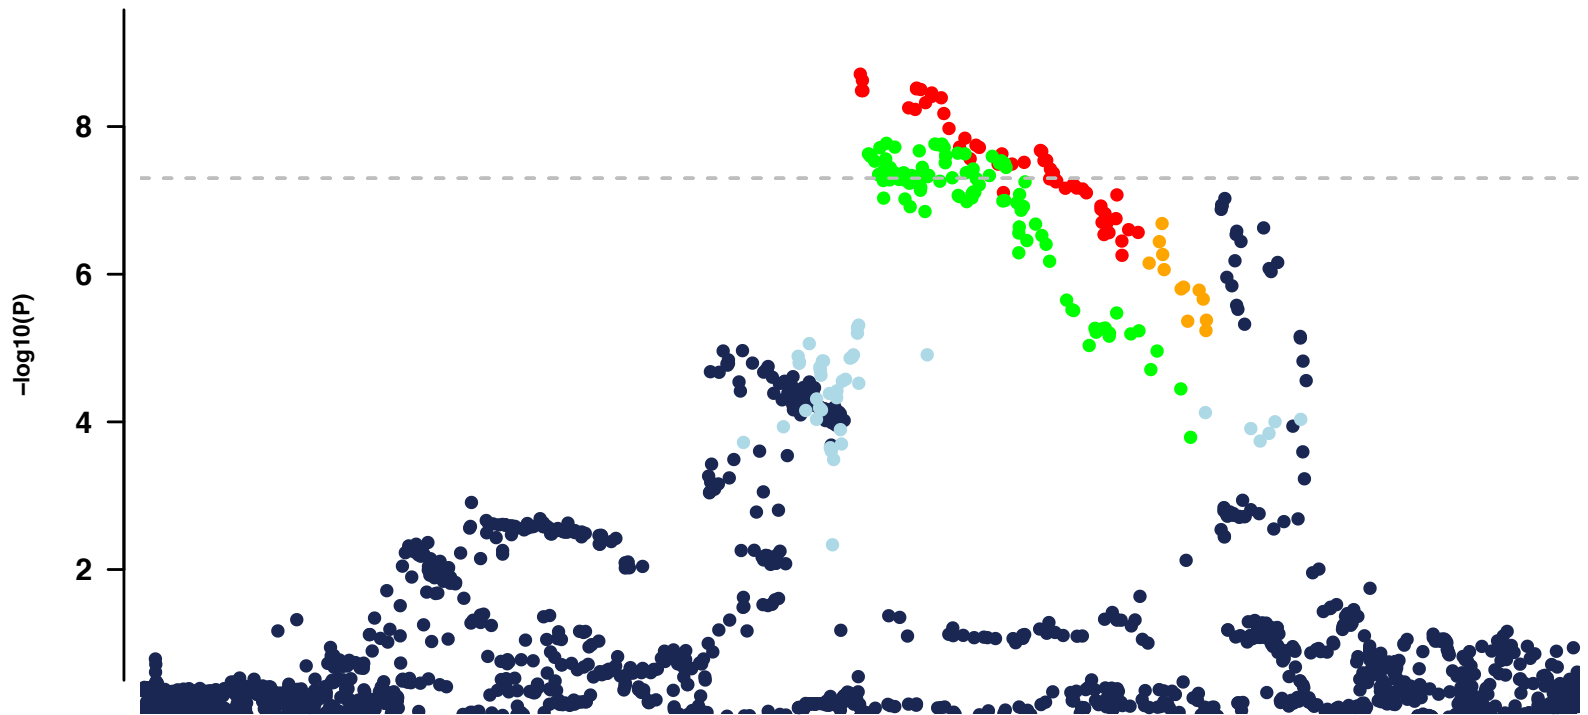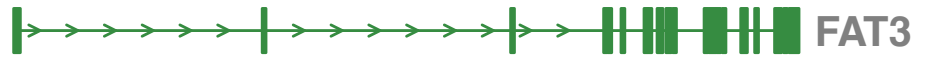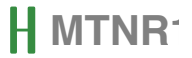

HGE

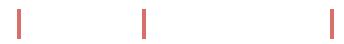

Mean\_parsorbitalis\_suravg: rs72691108

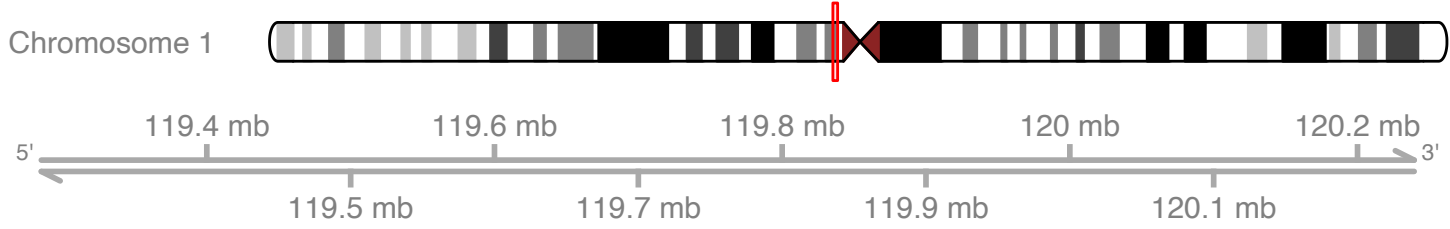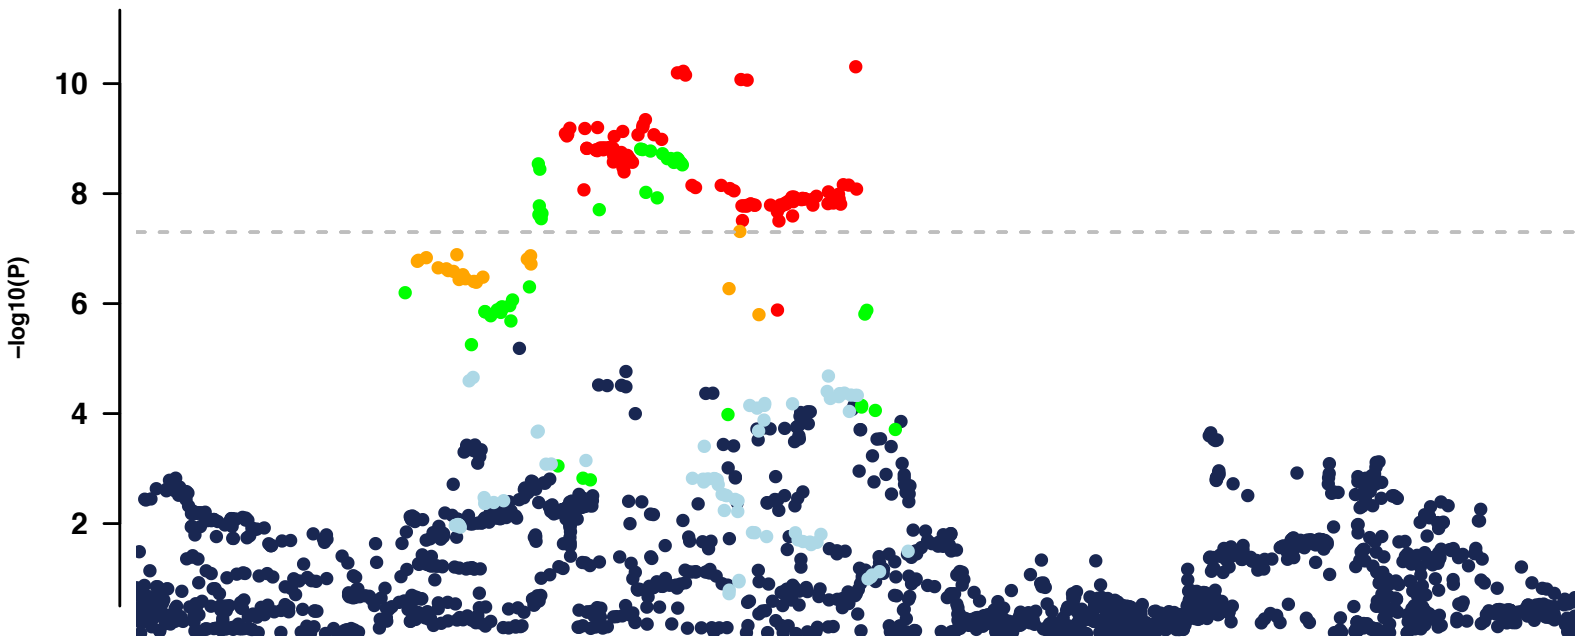

TBX15

HAO2

ZNF

WARS2

HSD3B2

HSD3B1

HGE

|||

|

|

|

|

|

# Mean\_parsopercularis\_surfvag: rs1159974

Chromosome 6

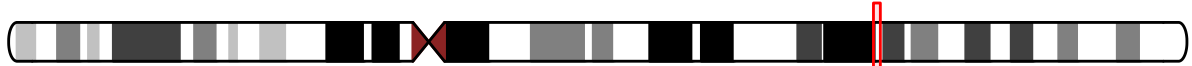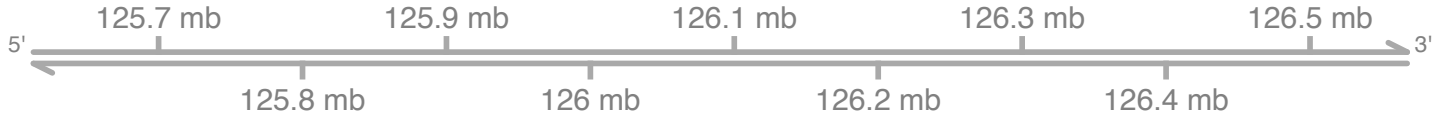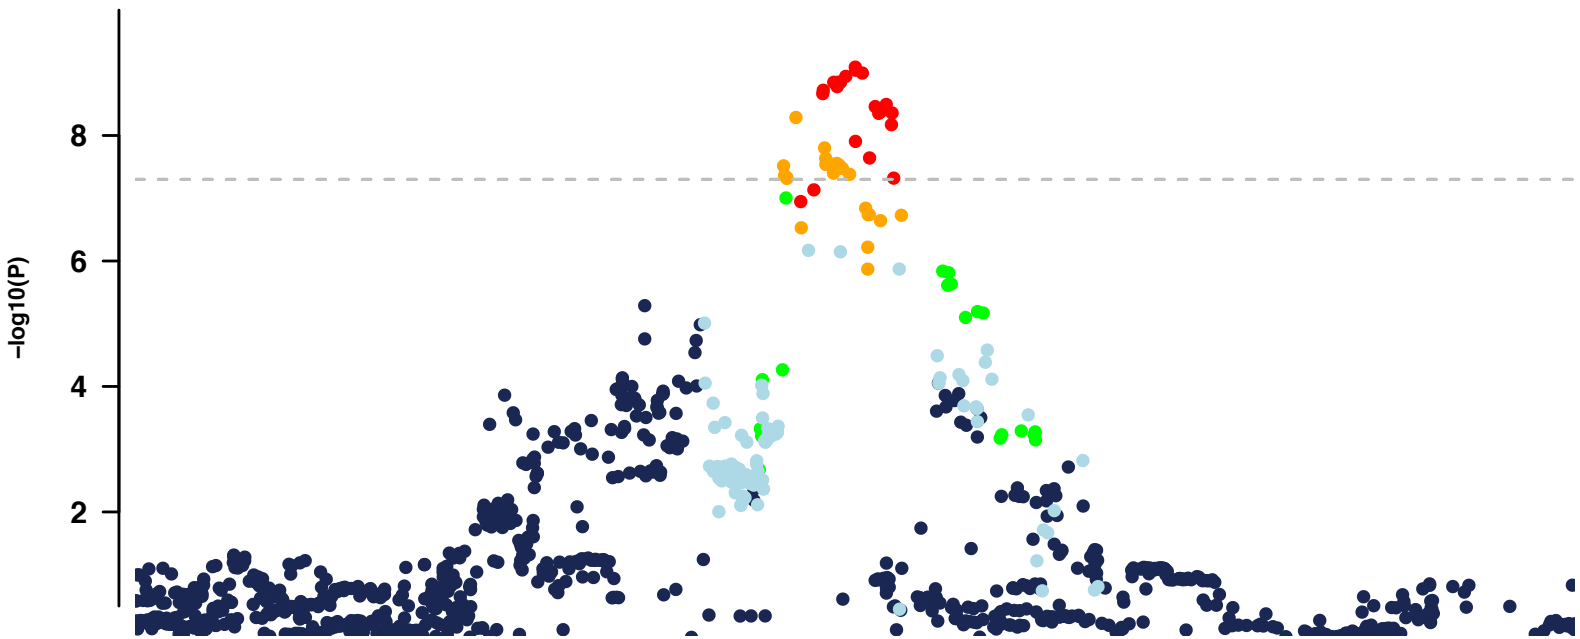

HDDC2

HEY2

HINT3

NCOA7

TRMT11

HGE

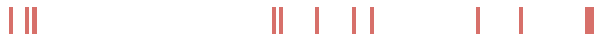

# Mean\_parsopercularis\_surfavg: rs76769503

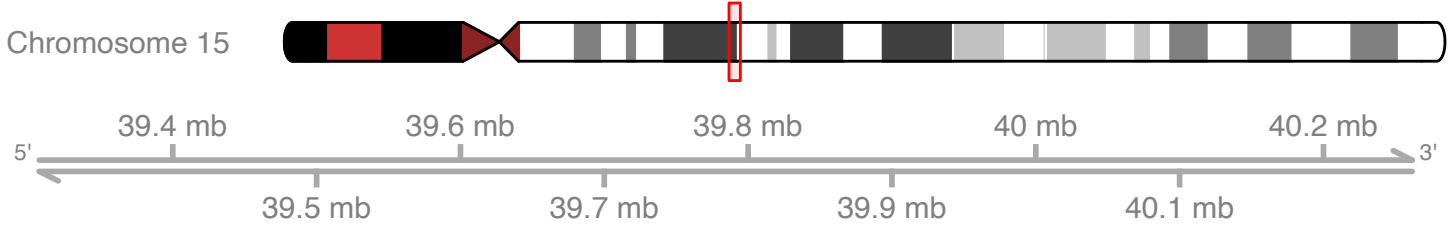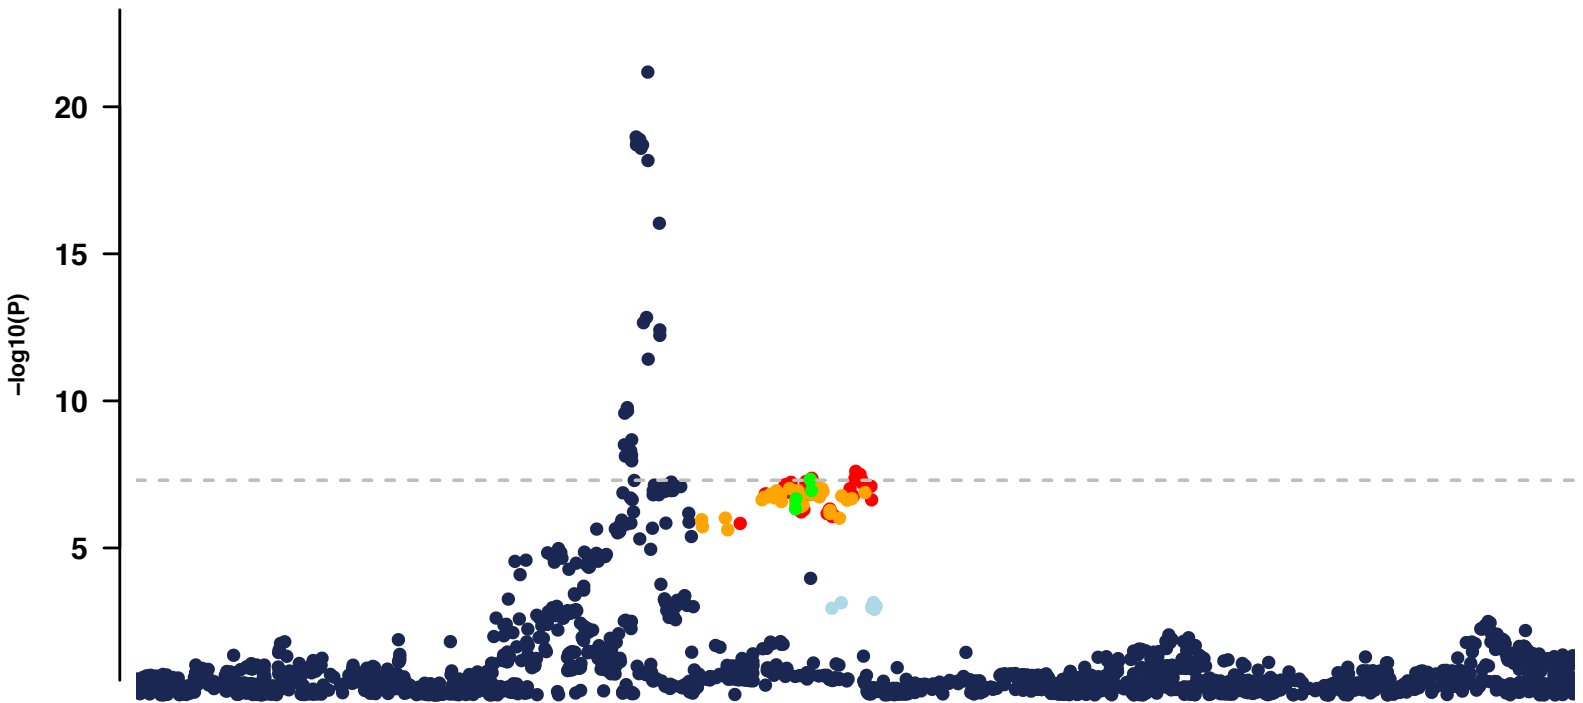

C15orf54

THBS1

GPR

FSIP1

HGE

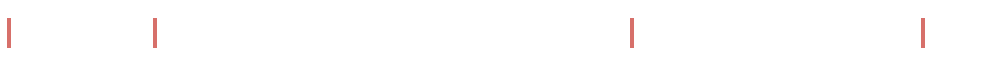

# Mean parahippocampal\_surfavg: rs1792354

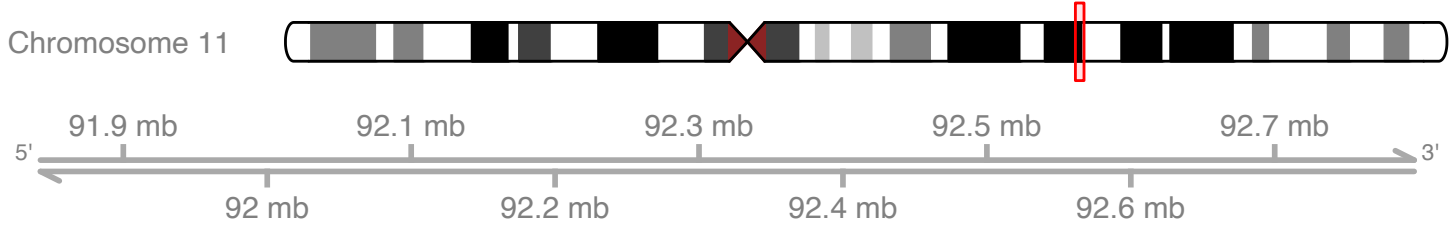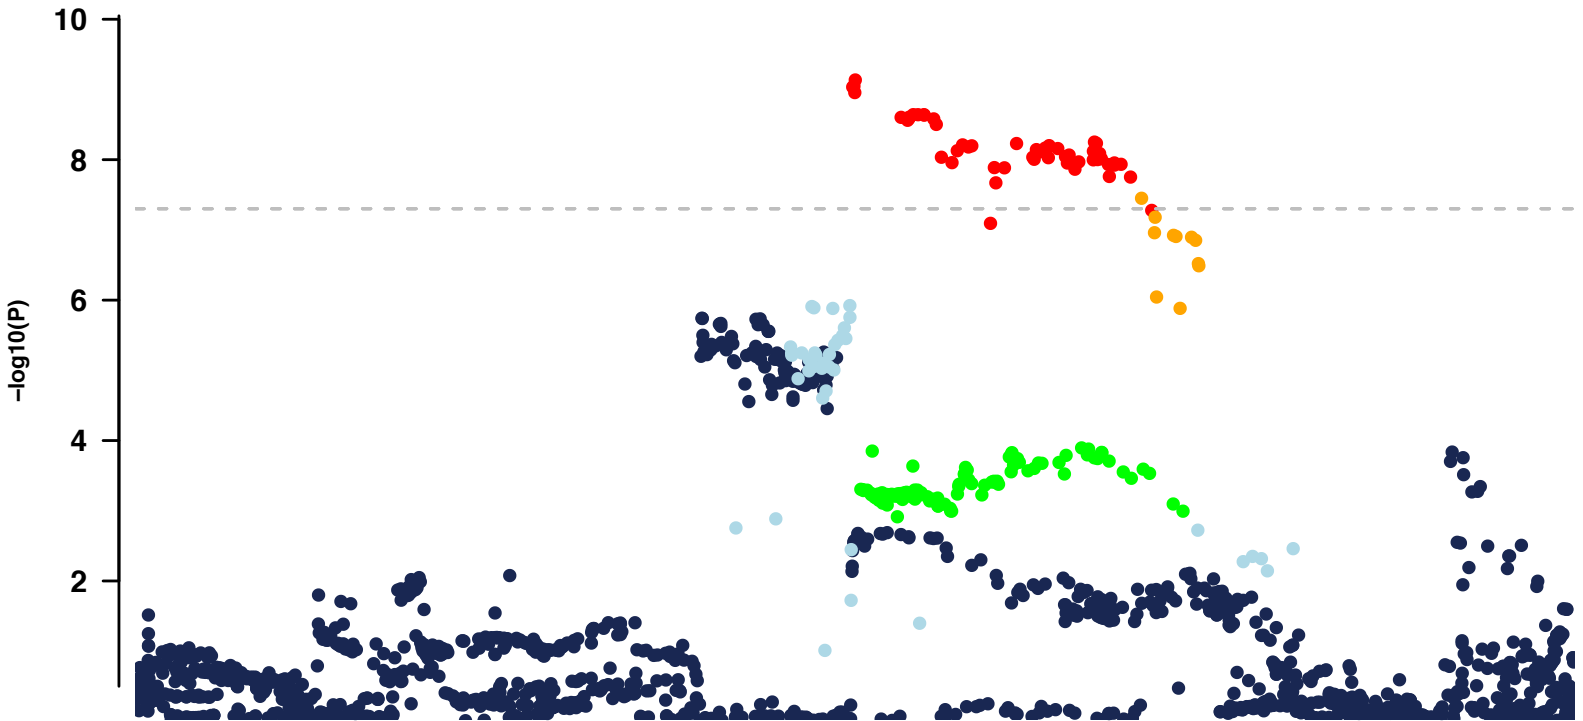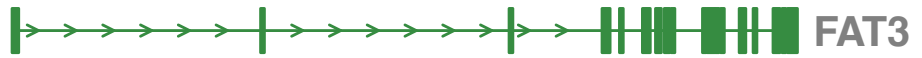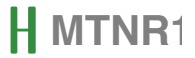

HGE

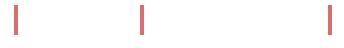

# Mean\_middletemporal\_suravg: rs1004552

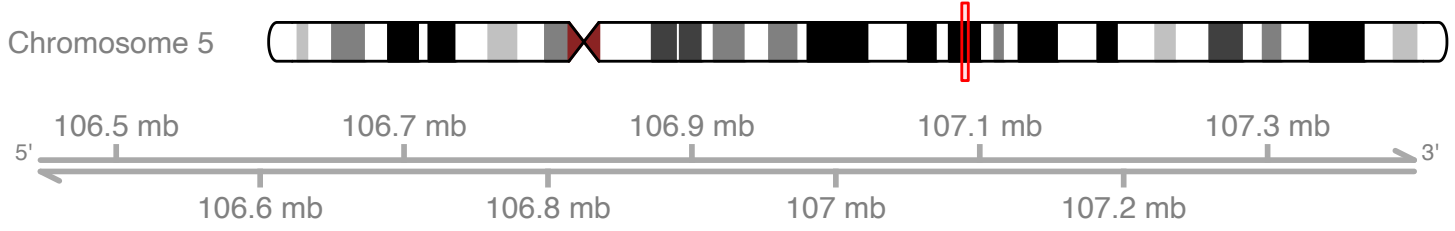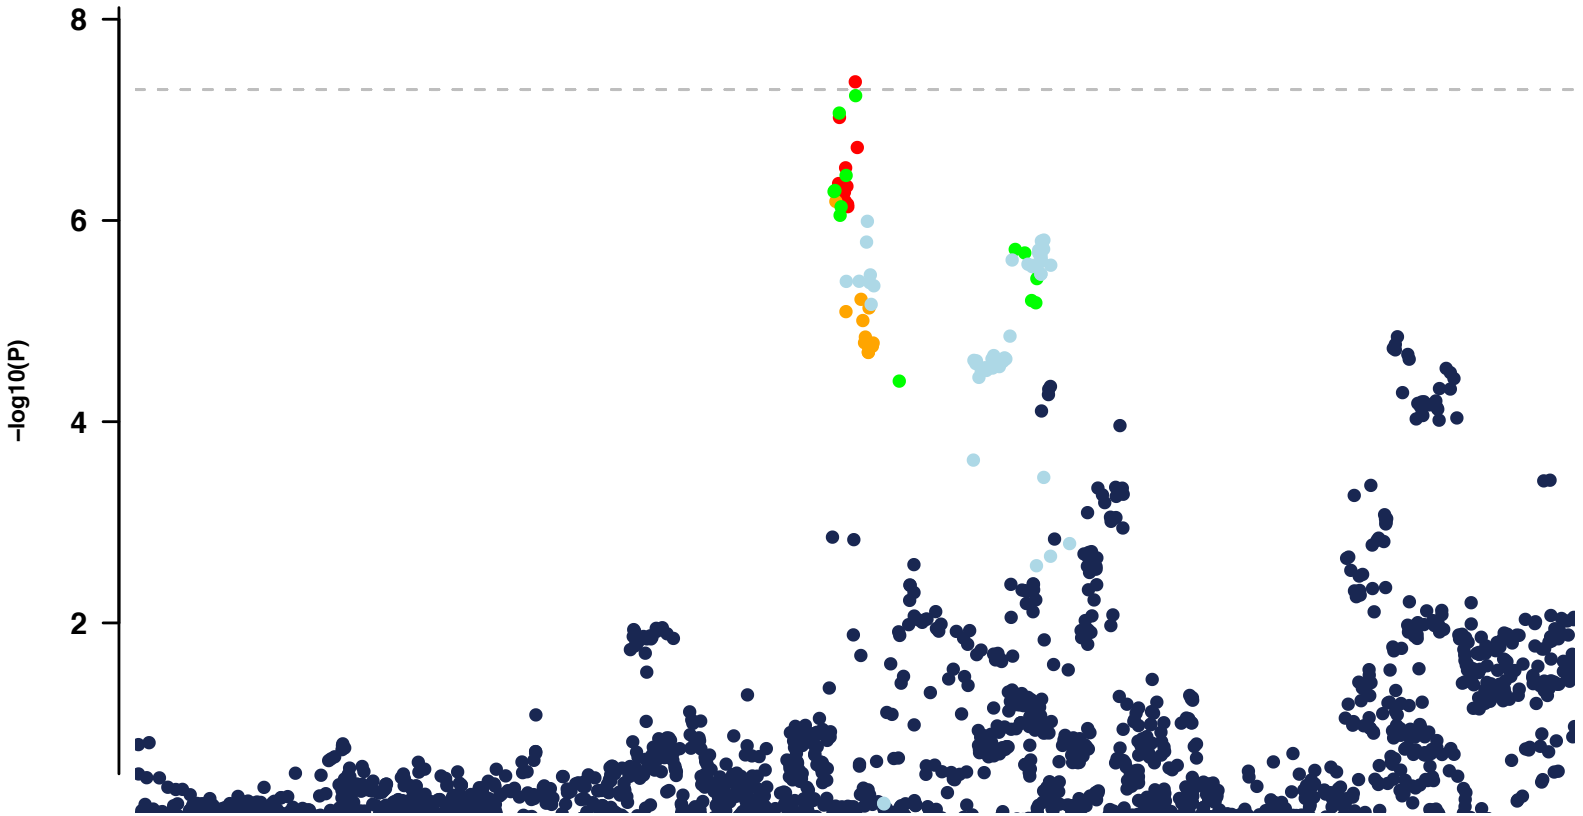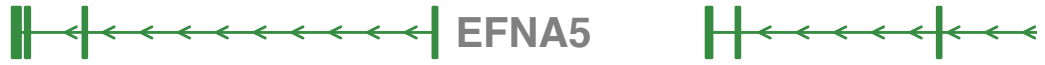

HGE

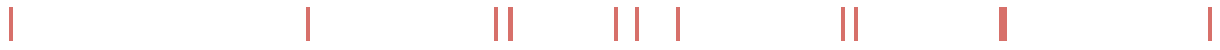



# Mean\_middletemporal\_suravg: rs17376456

Chromosome 5

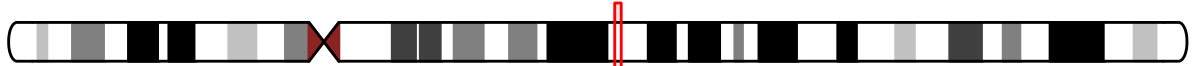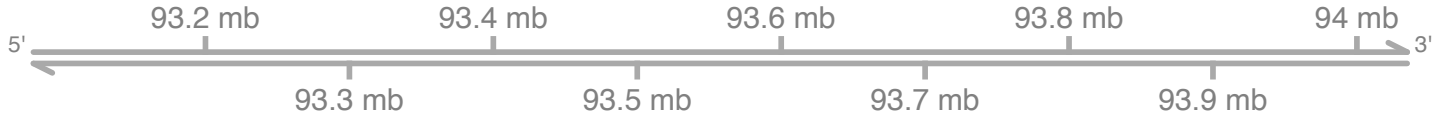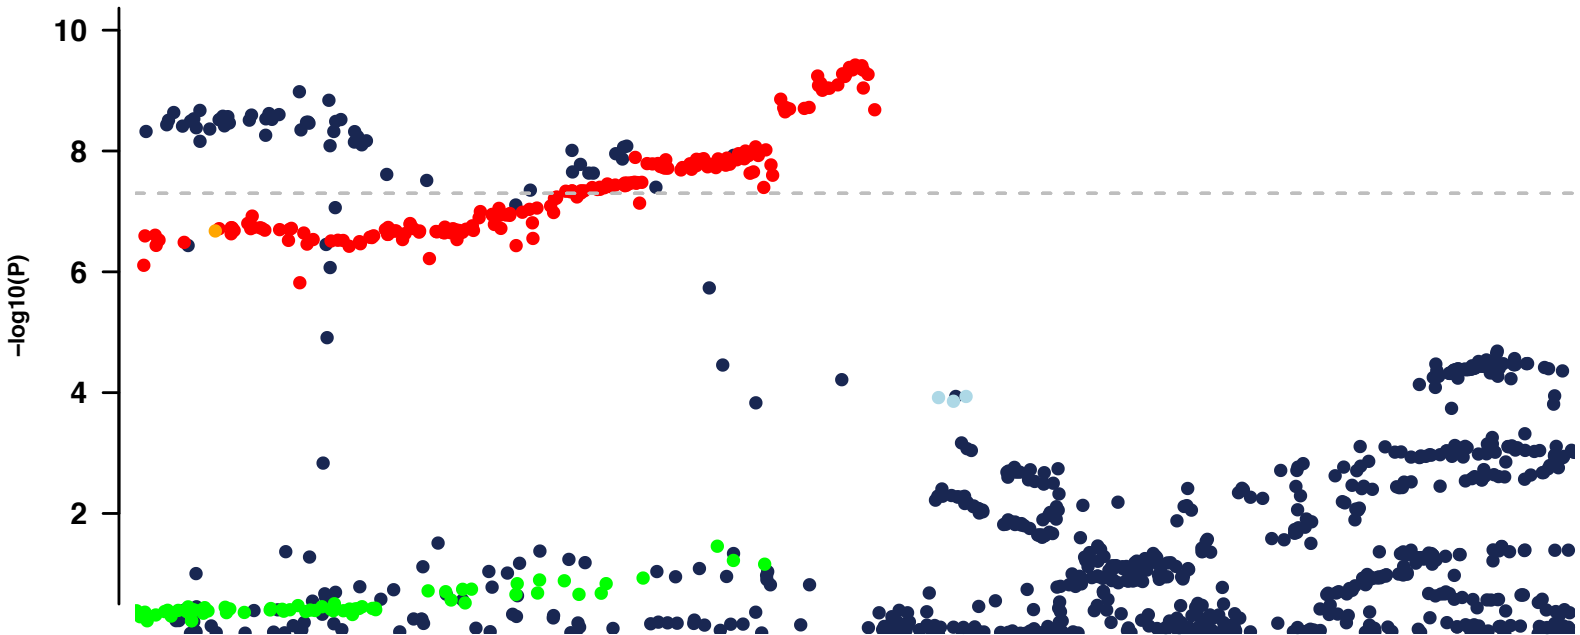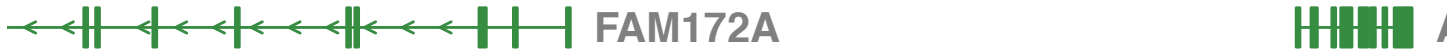

POU5F2

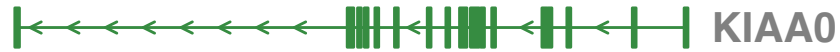

HGE

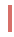

# Mean\_medialorbitofrontal\_surfvag: rs2804934

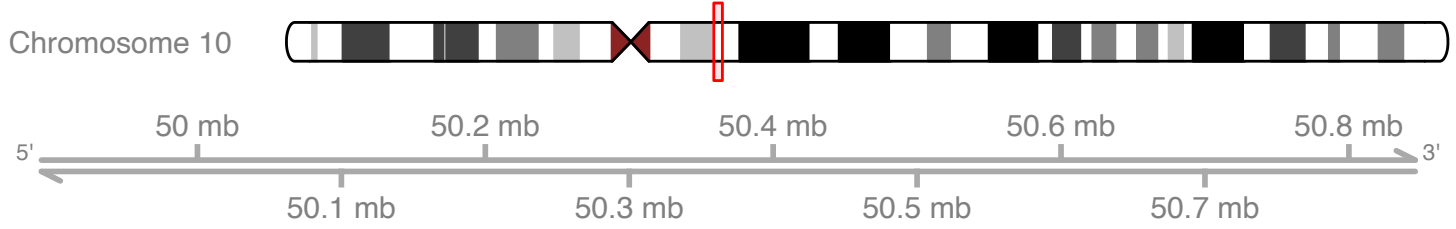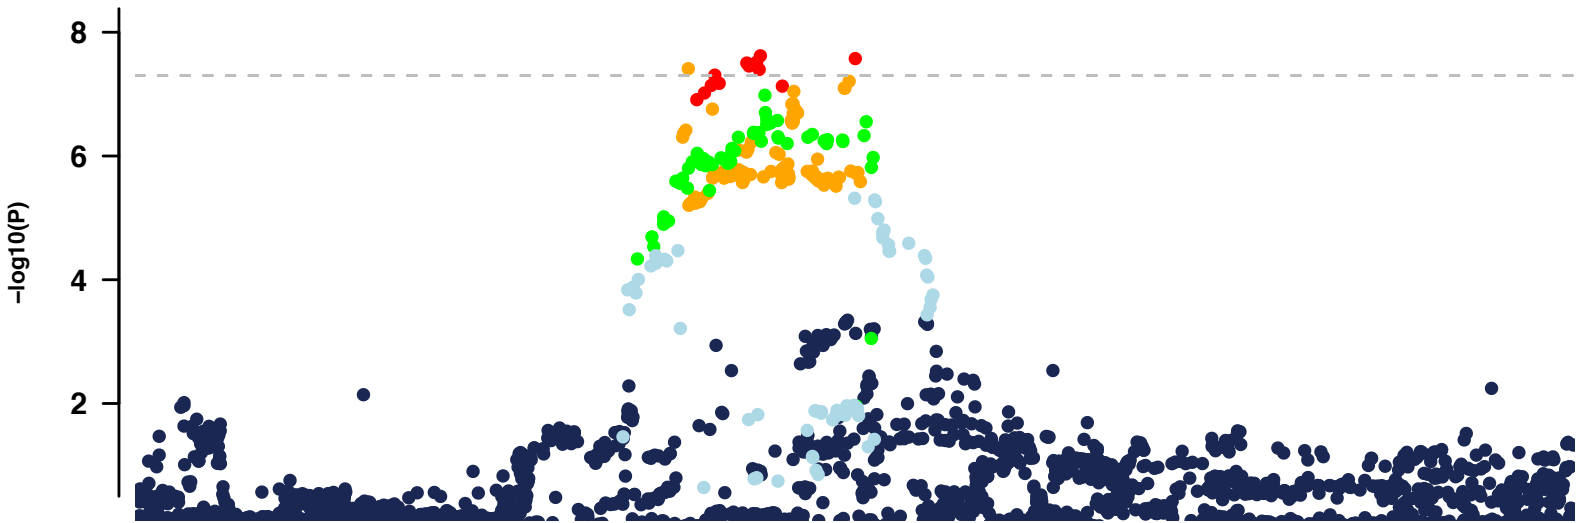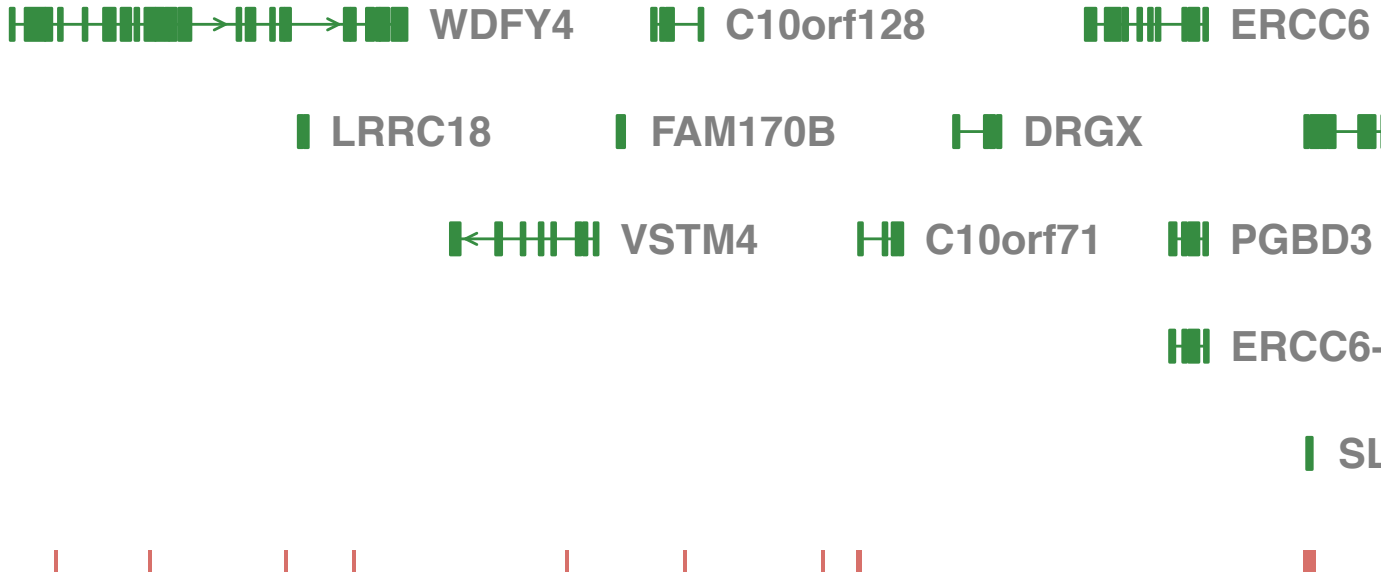

# Mean\_lingual\_surfav: rs28410513

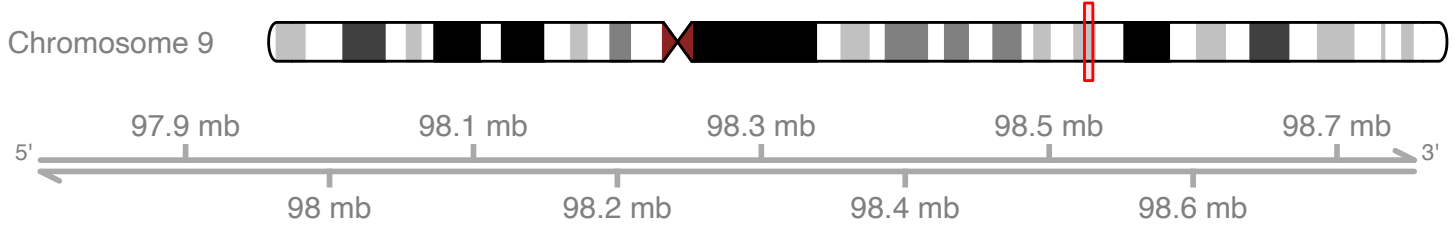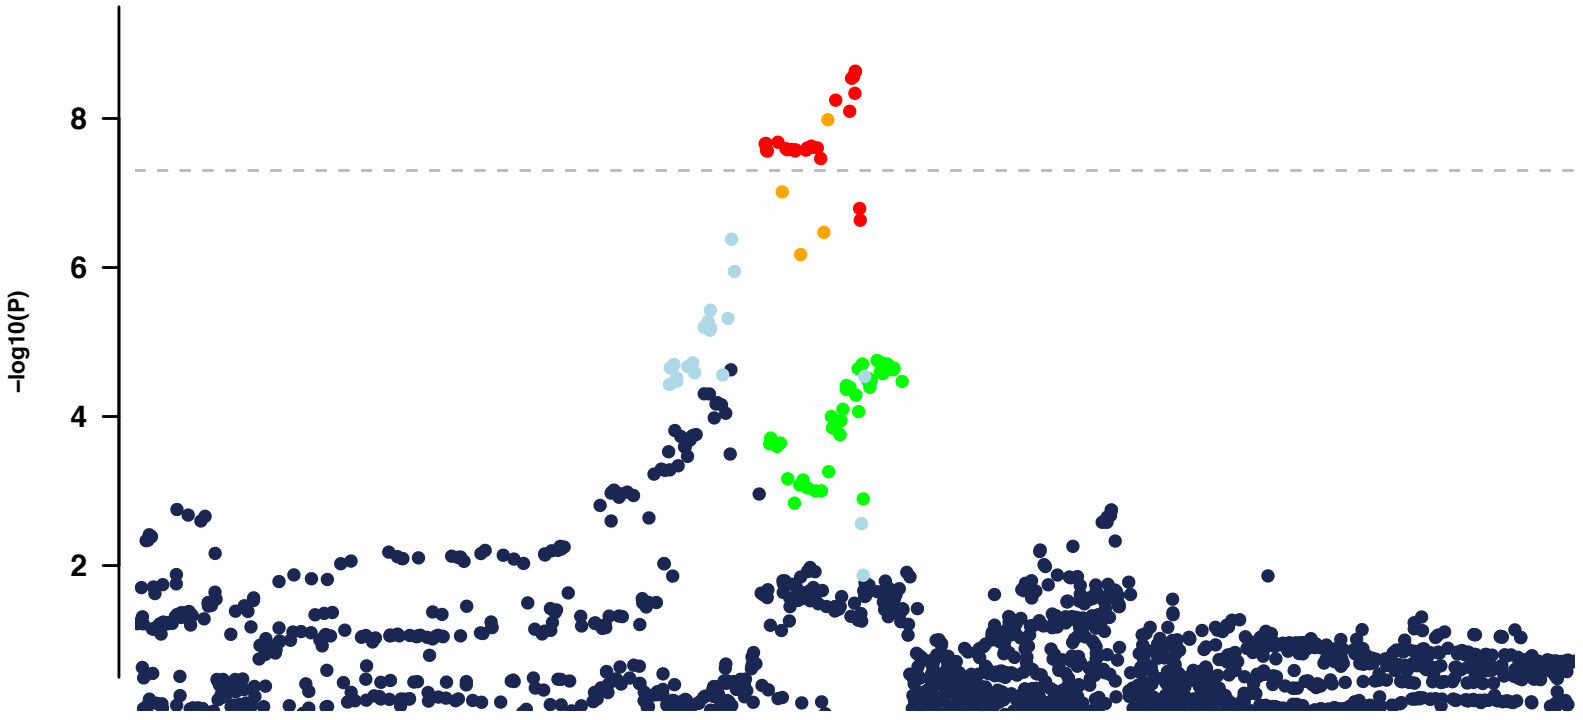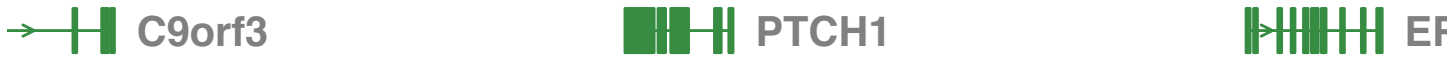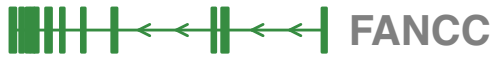

HGE

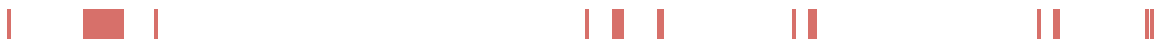

# Mean\_lingual\_surfavg: rs9401907

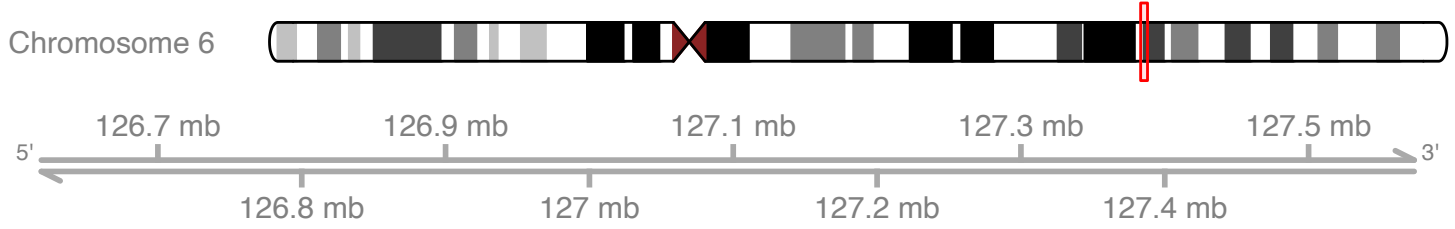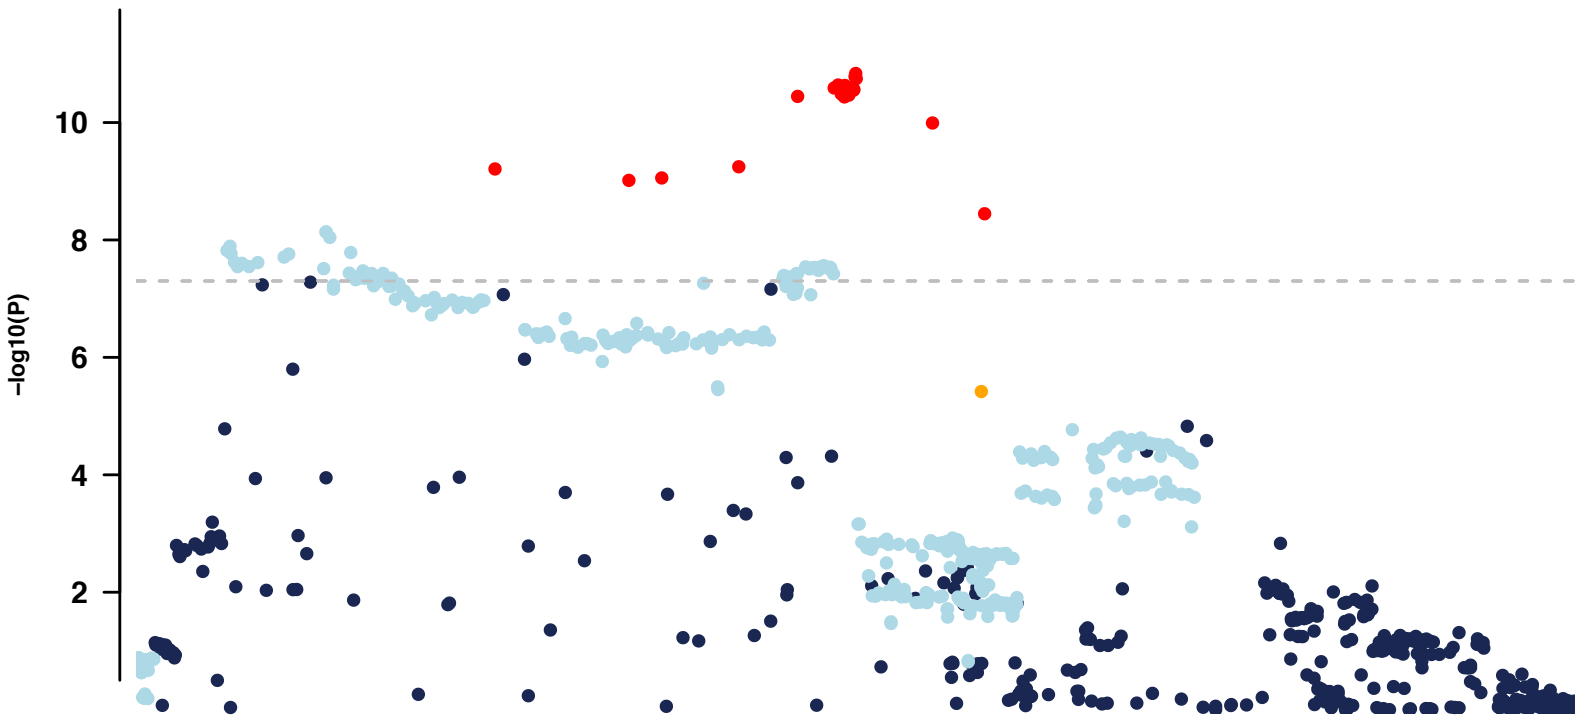

CENPW

RSP

HGE

|

|

### Mean\_lingual\_surfav: rs6812278

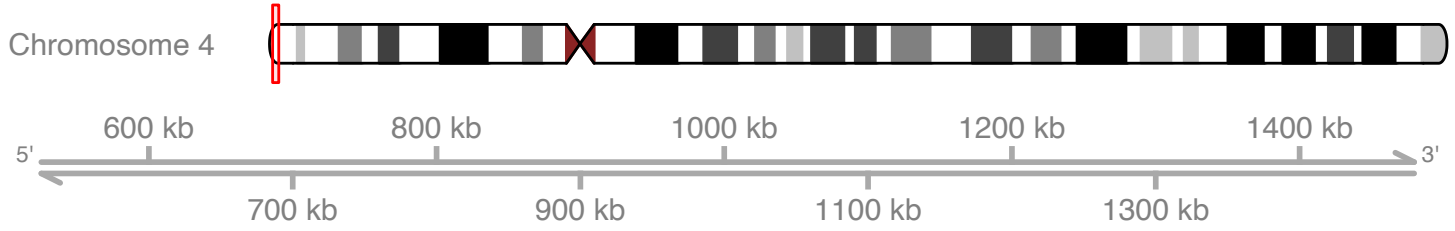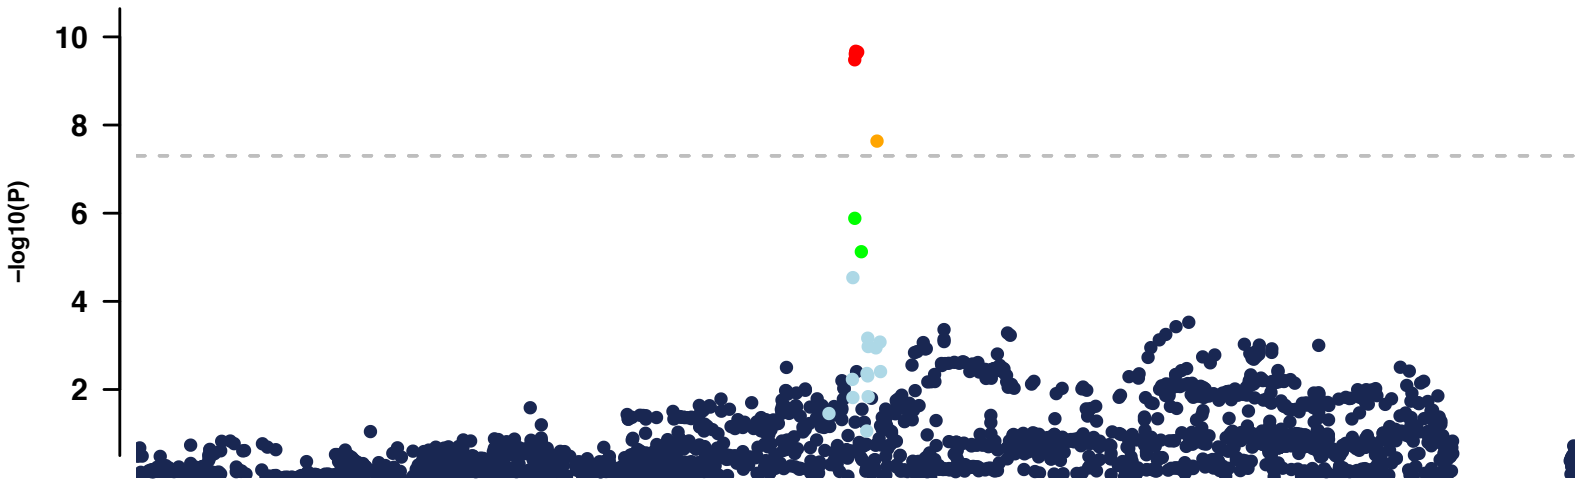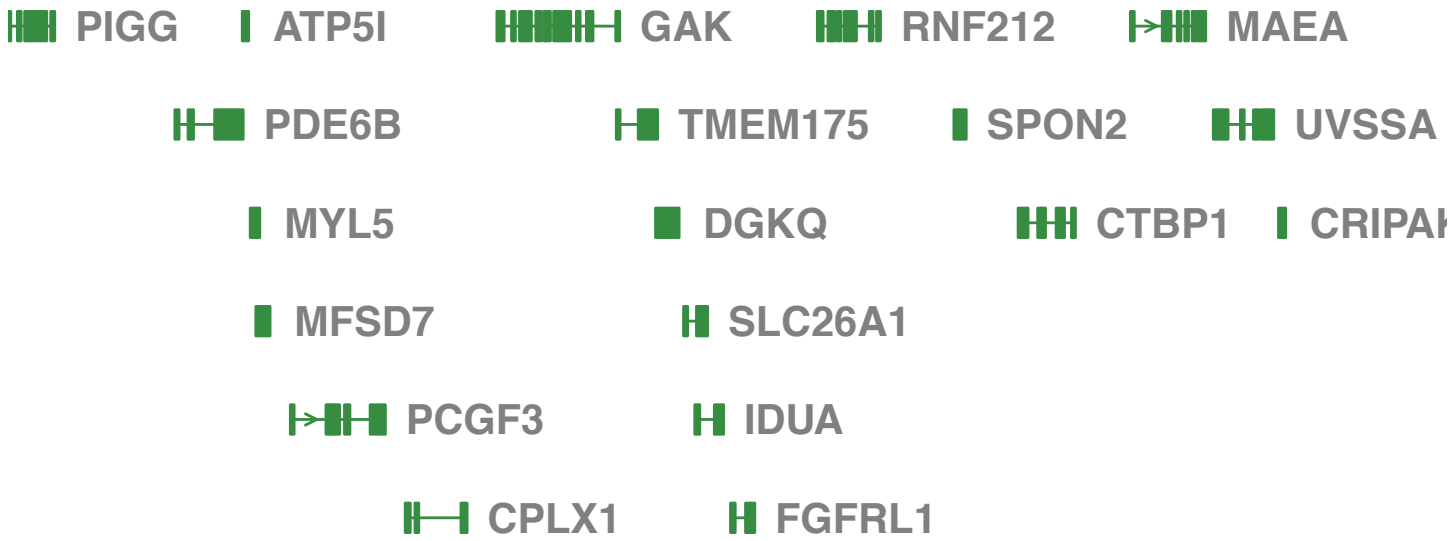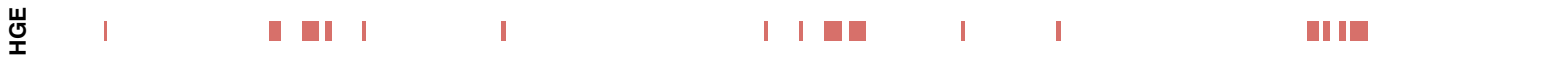

# Mean\_lingual\_surfavg: rs7914158

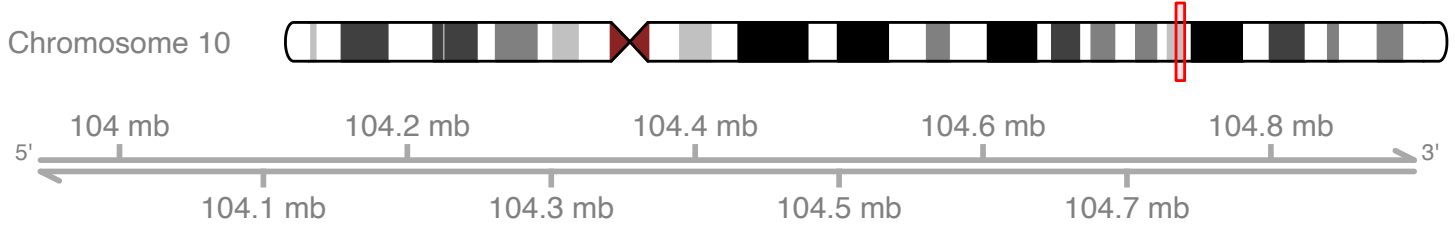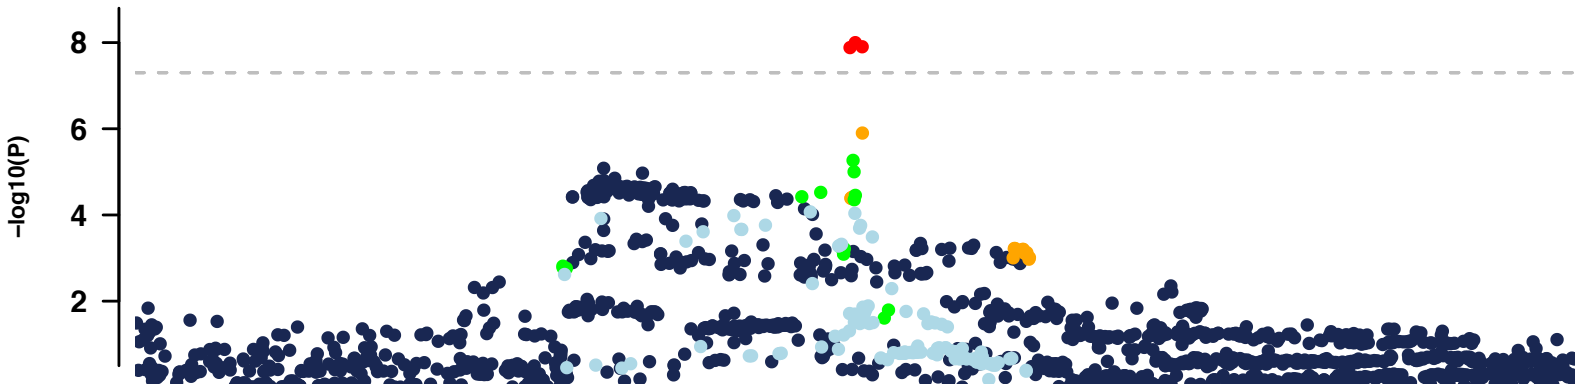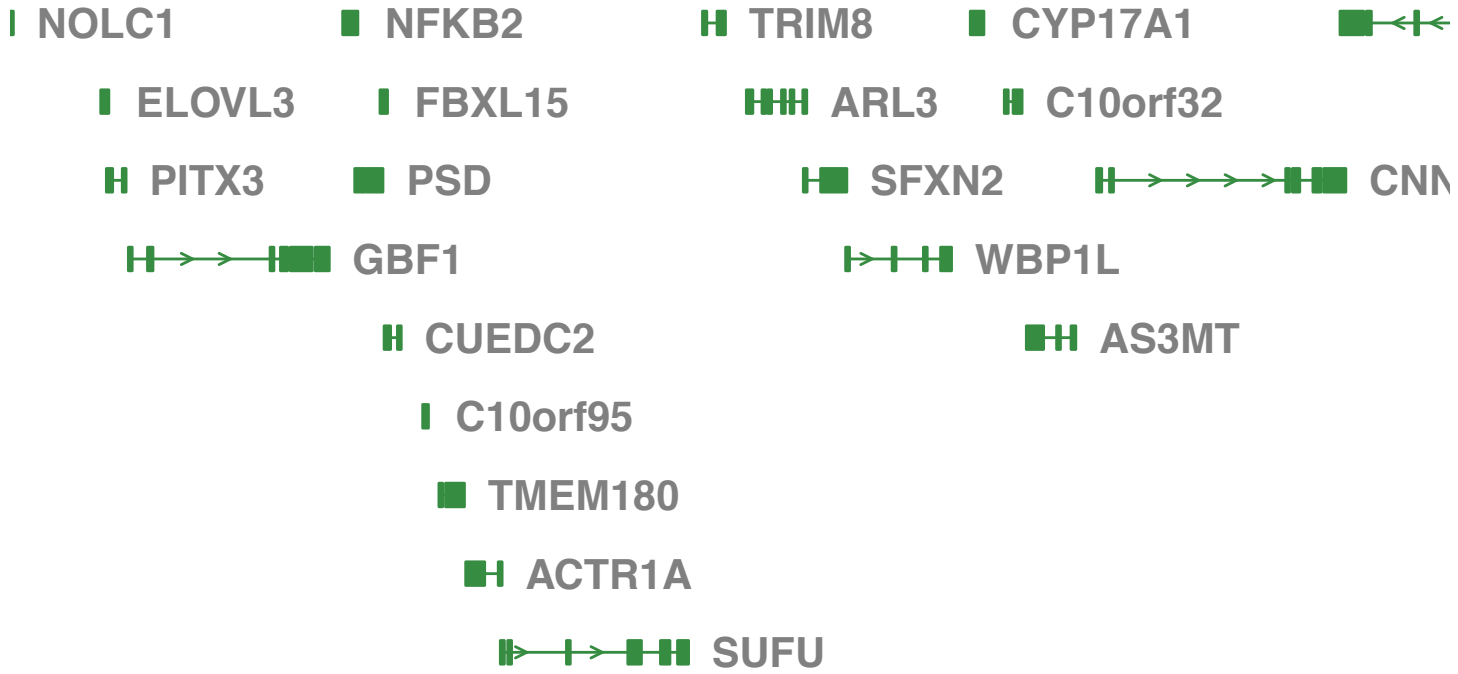

HGE

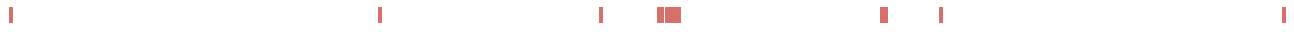

# Mean\_lingual\_surfav: rs6603991

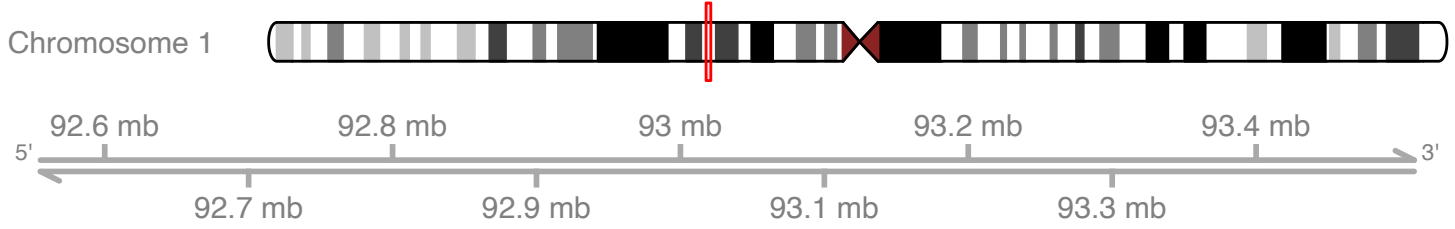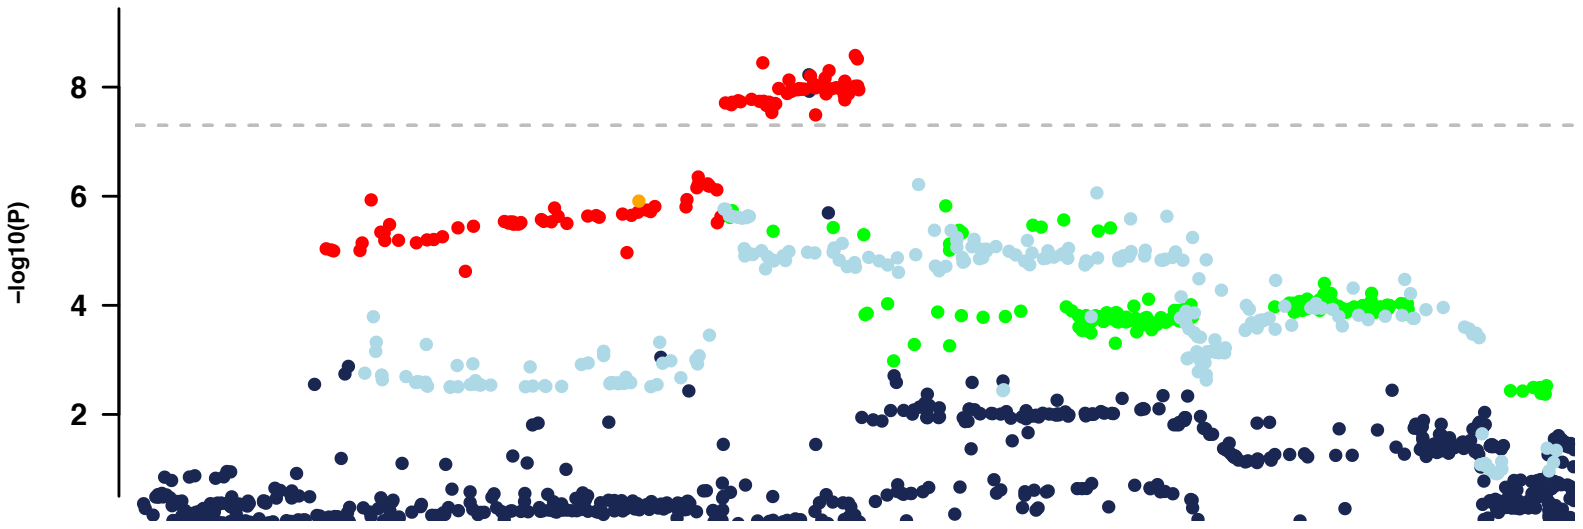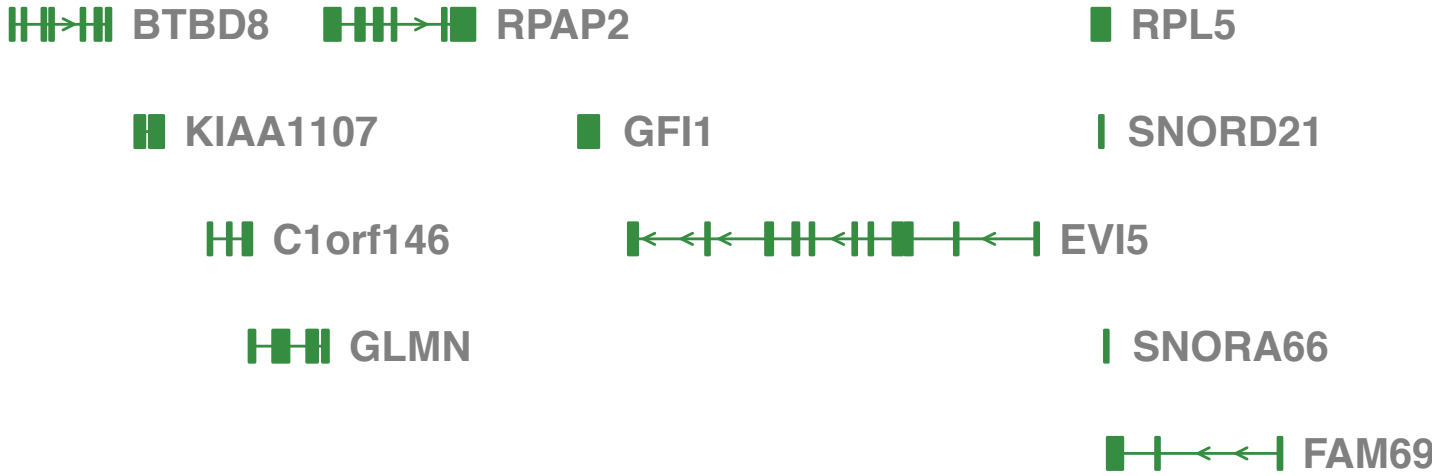

HGE

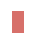

# Mean\_lingual\_surfav: rs1934057

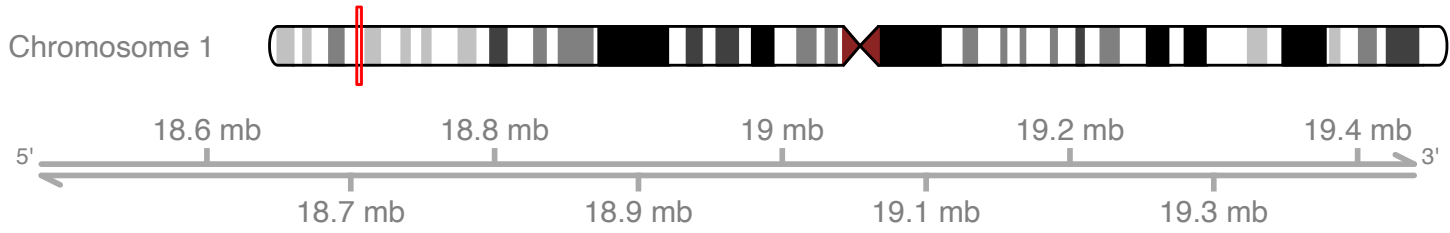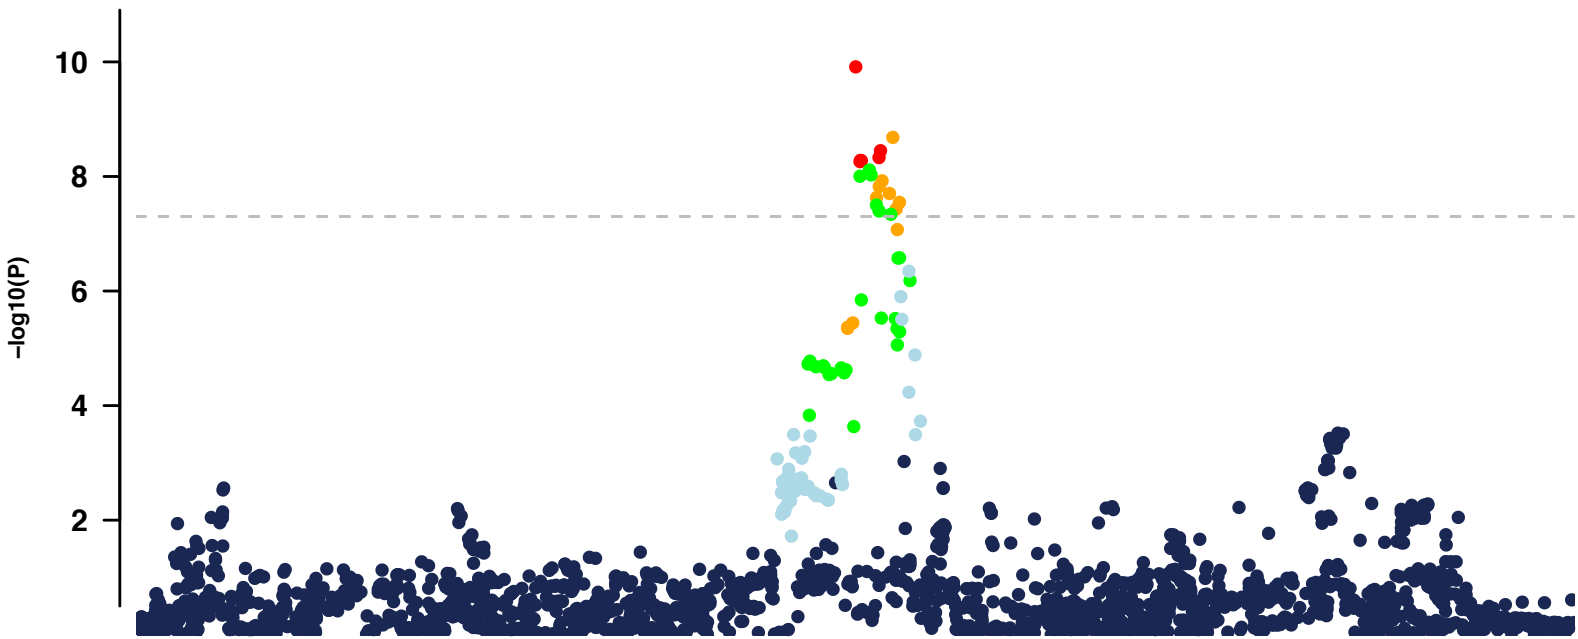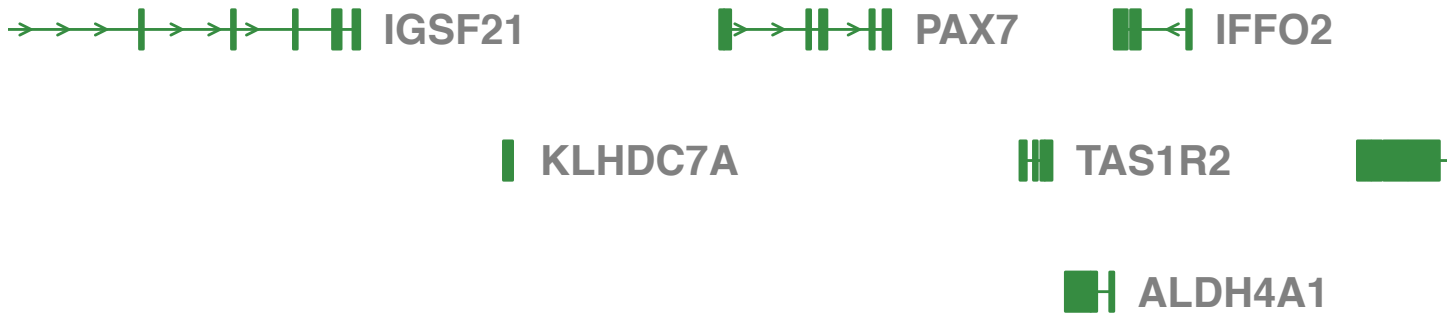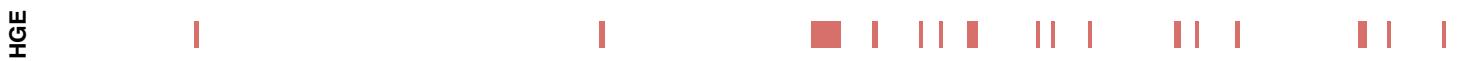



# Mean\_lateralorbitofrontal\_surfavg: rs13208234

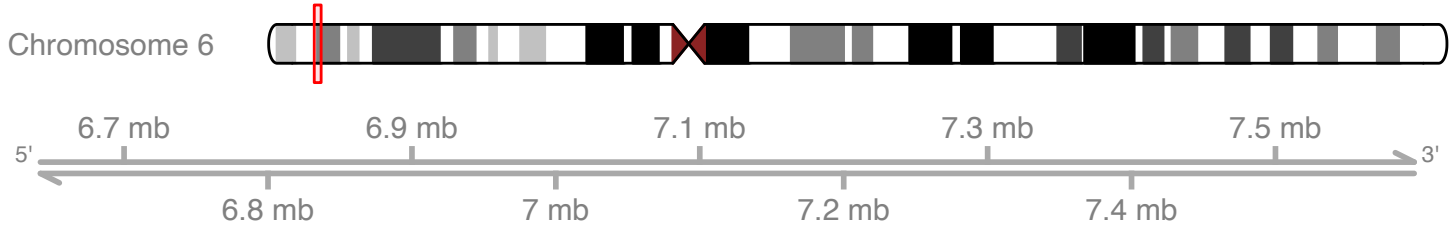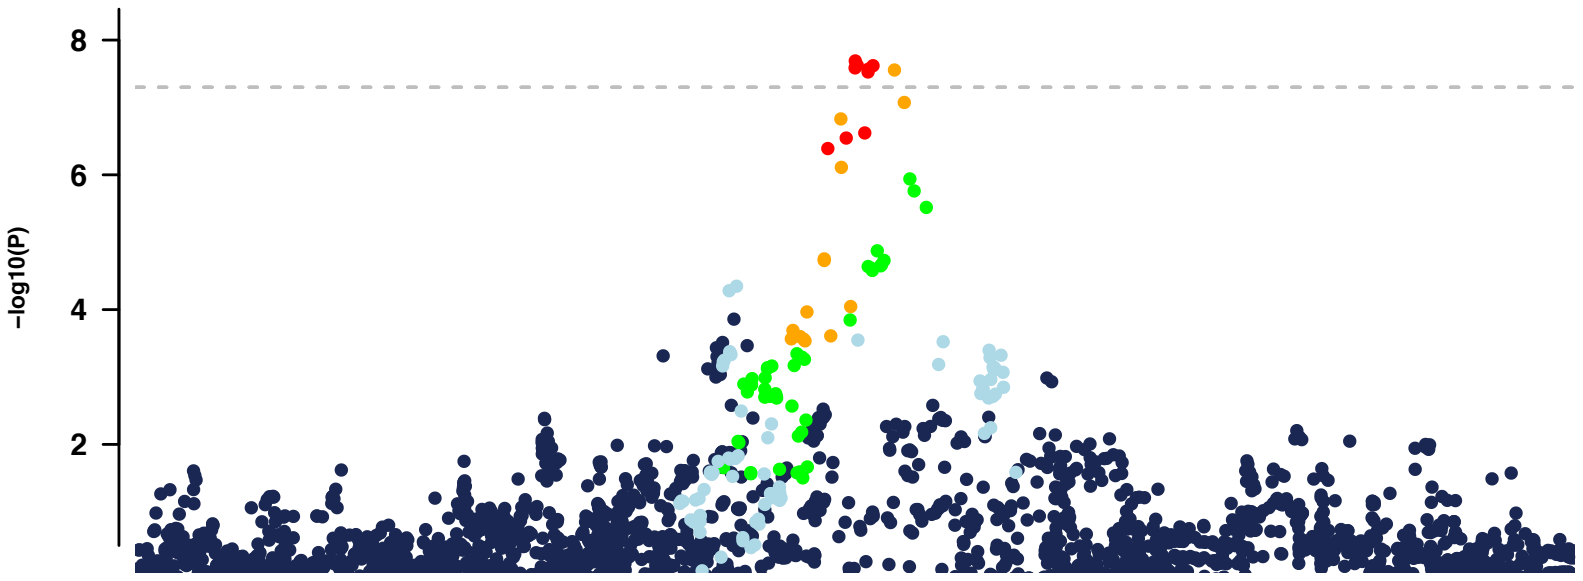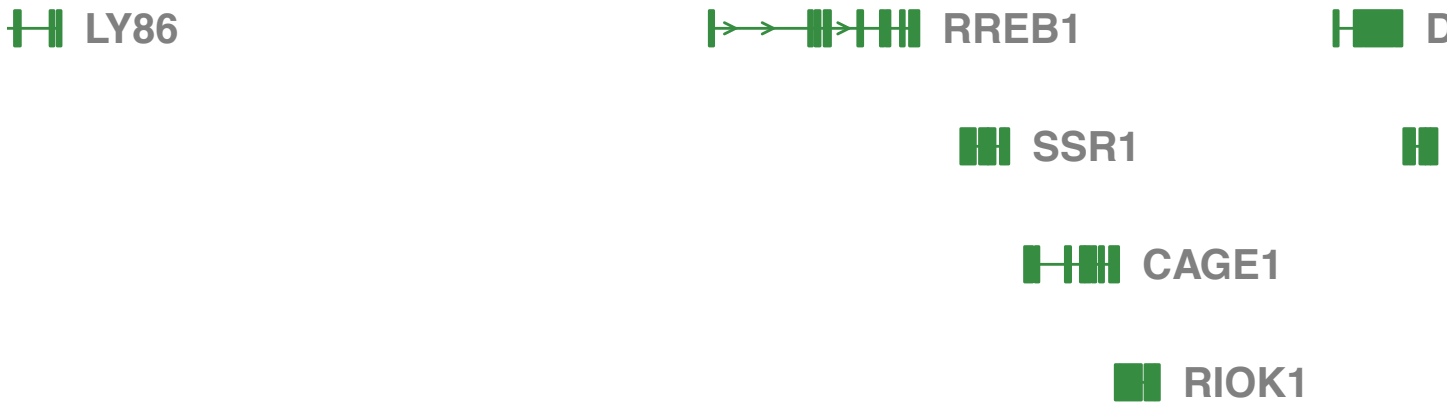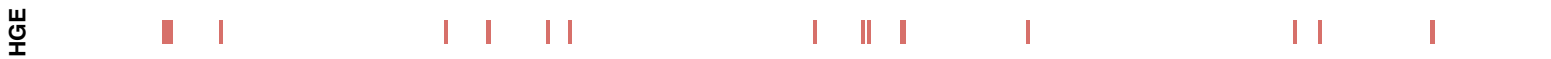

# Mean\_lateraloccipital\_surfavg: rs28496034

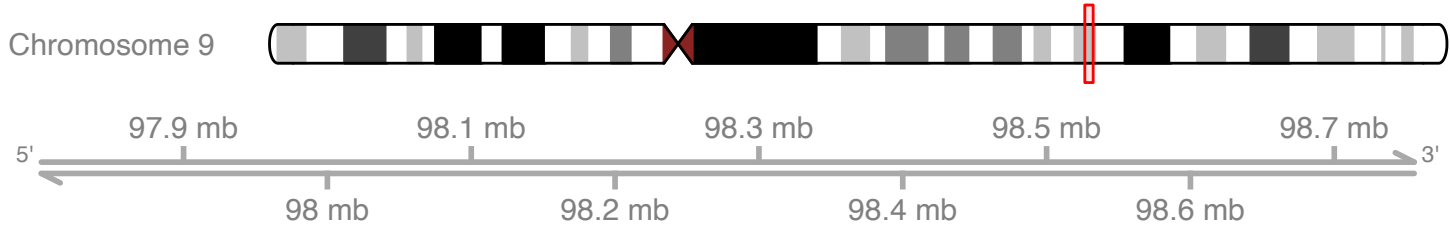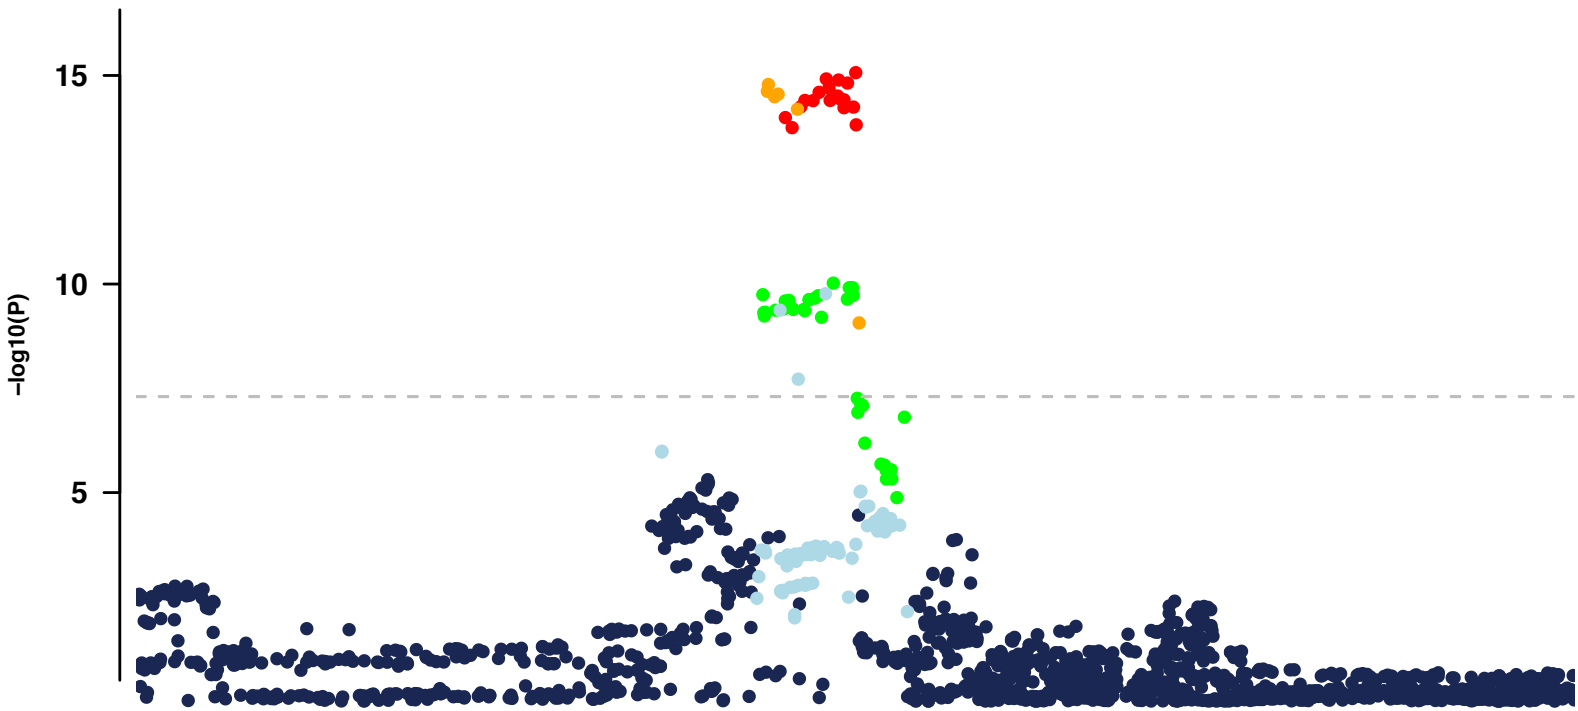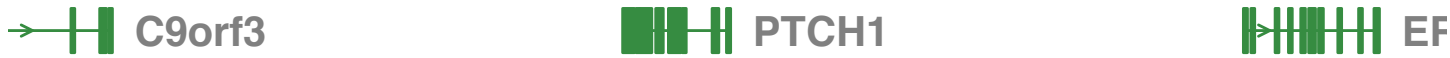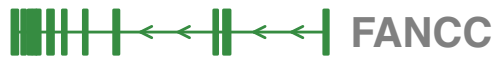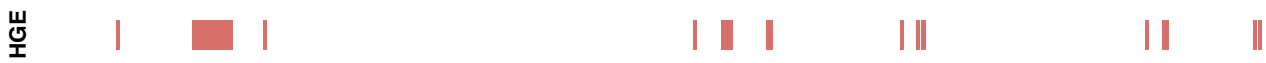

# Mean\_lateraloccipital\_suravg: rs9401907

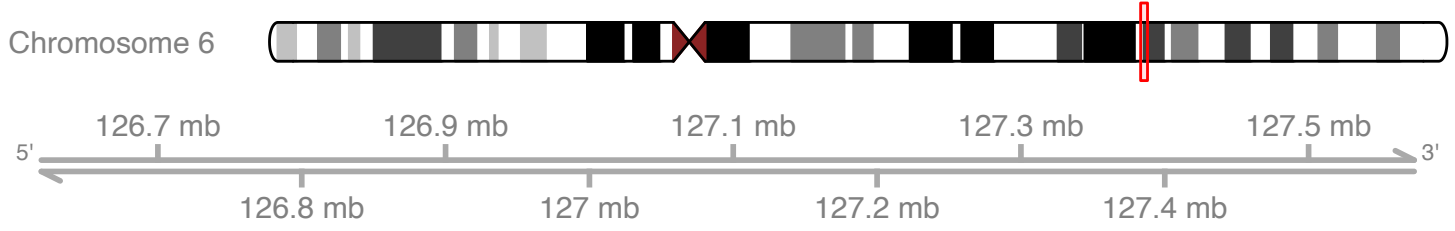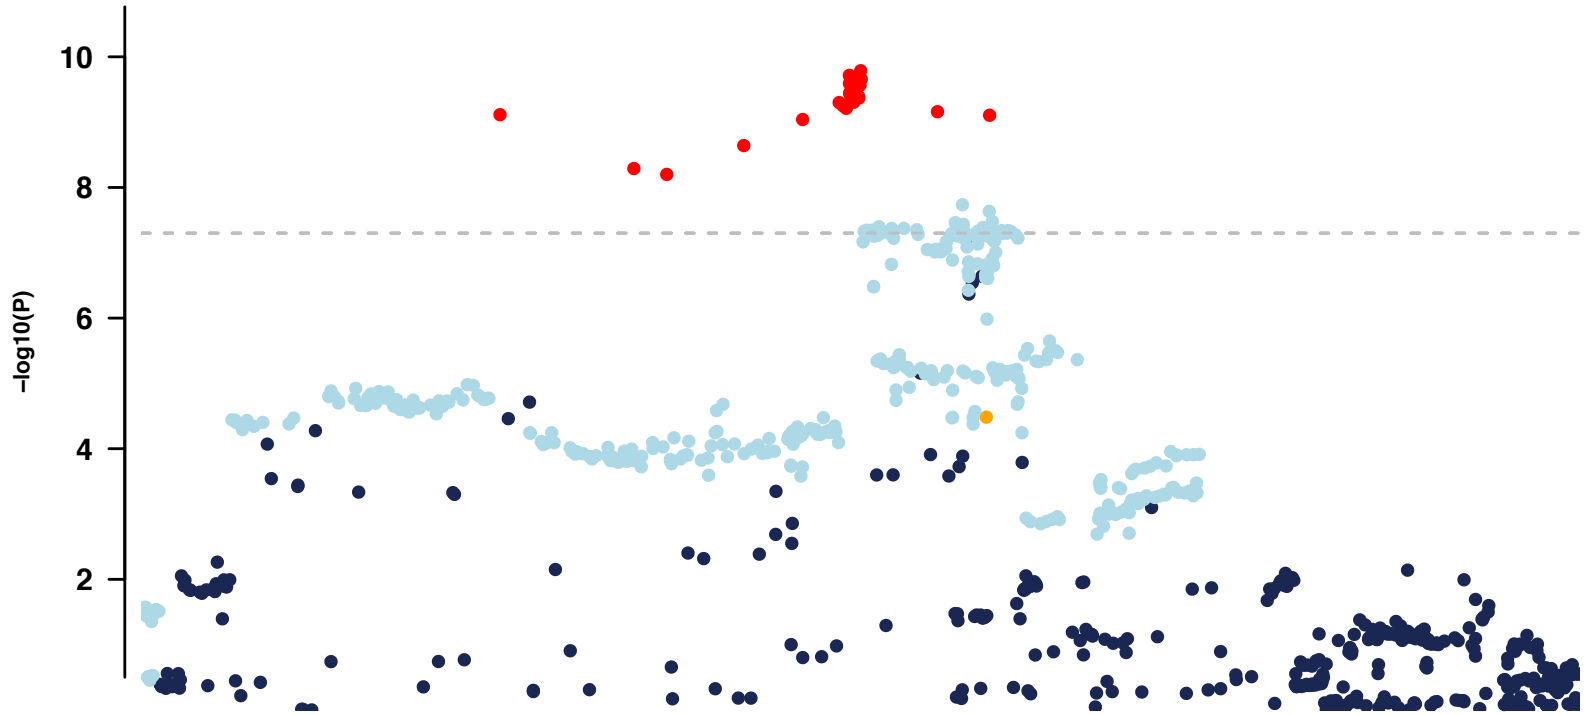

CENPW

RSP

HGE

|

# Mean\_lateraloccipital\_surfavg: rs56007616

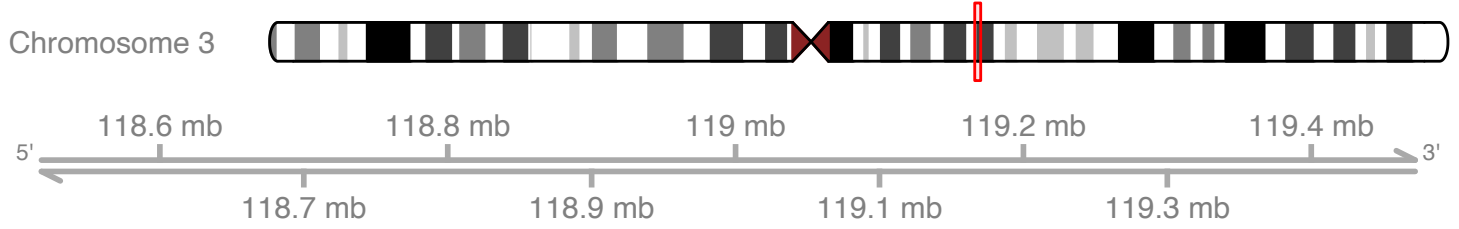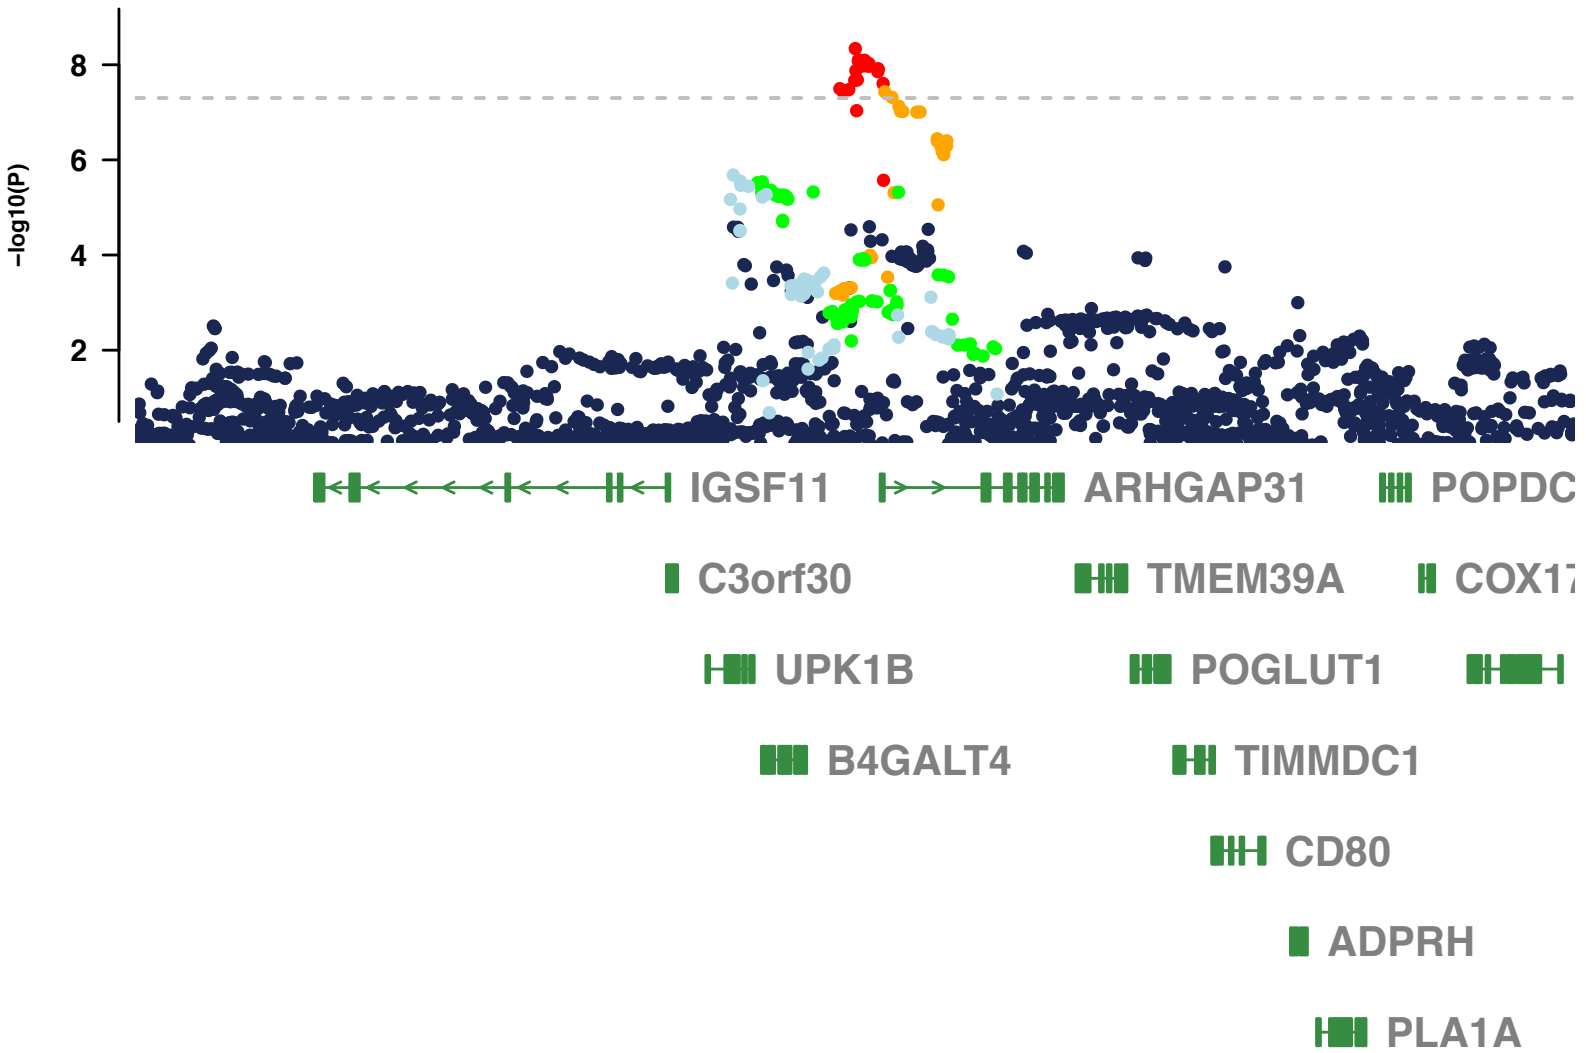

HGE

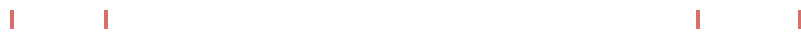

# Mean\_lateraloccipital\_surfav: rs4953152

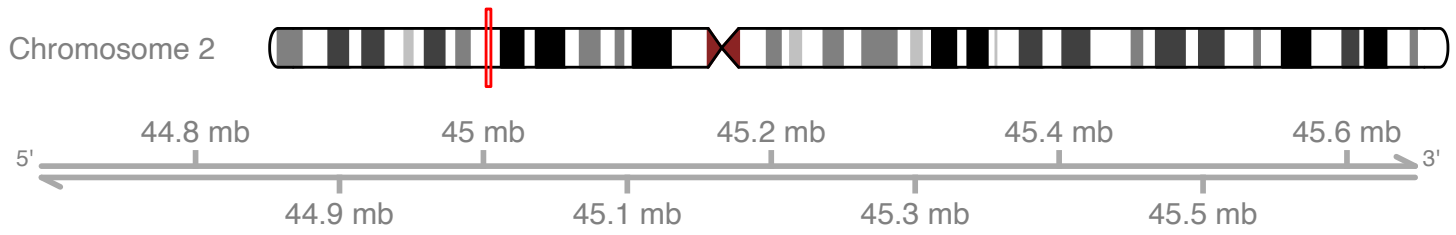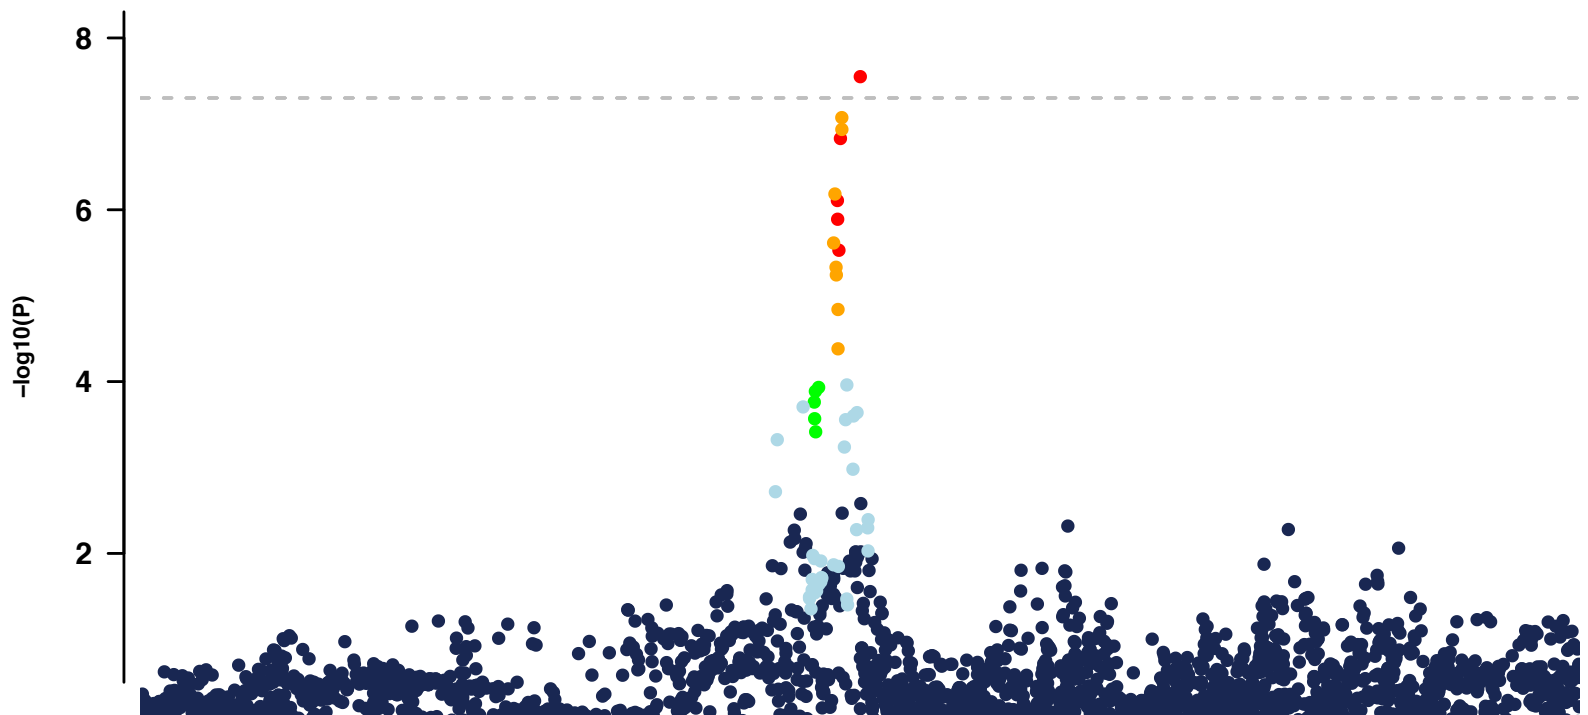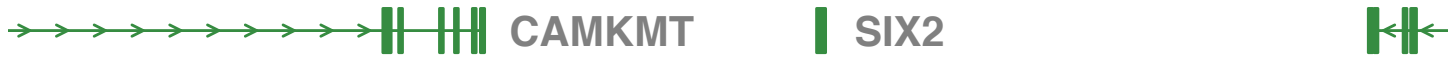

HGE

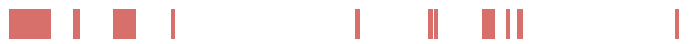

# Mean\_lateraloccipital\_surfavg: rs28514429

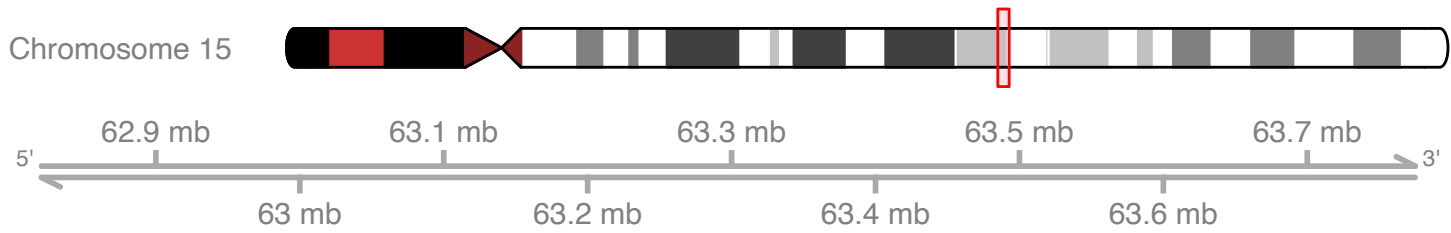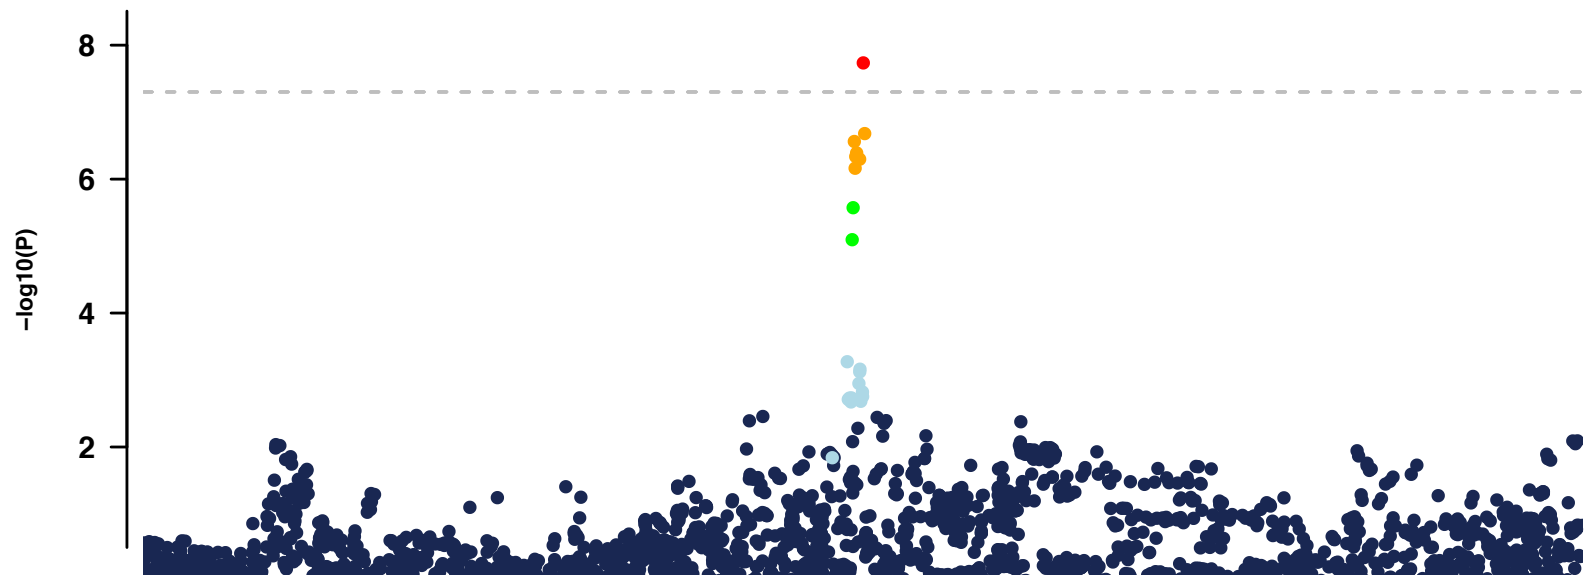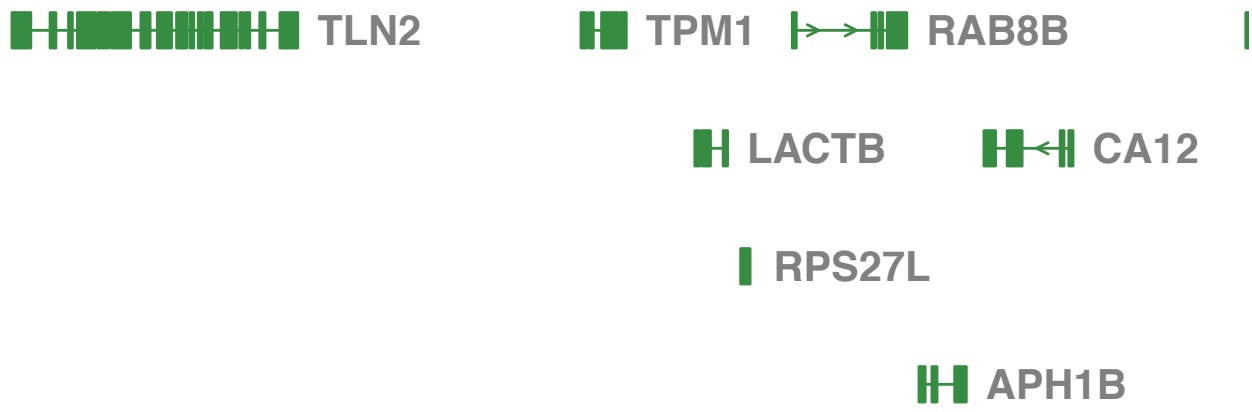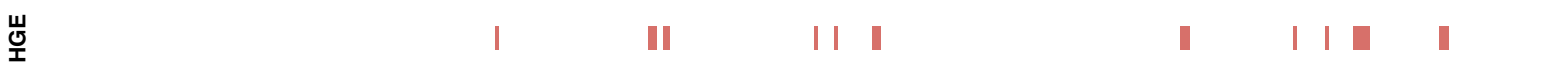

# Mean\_insula\_surfavg: rs9401907

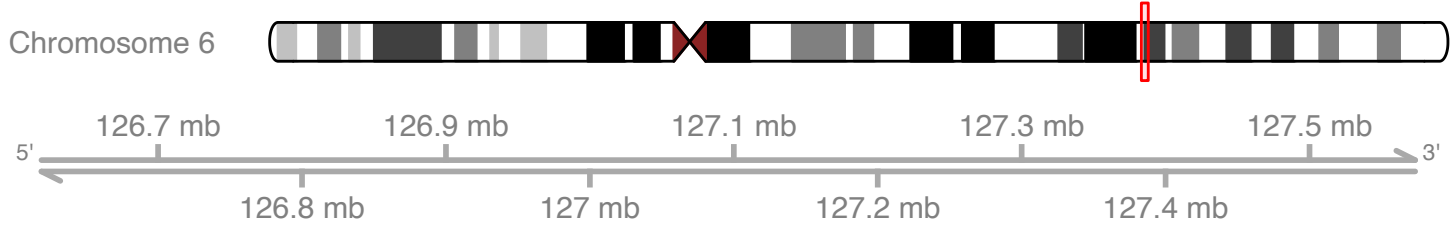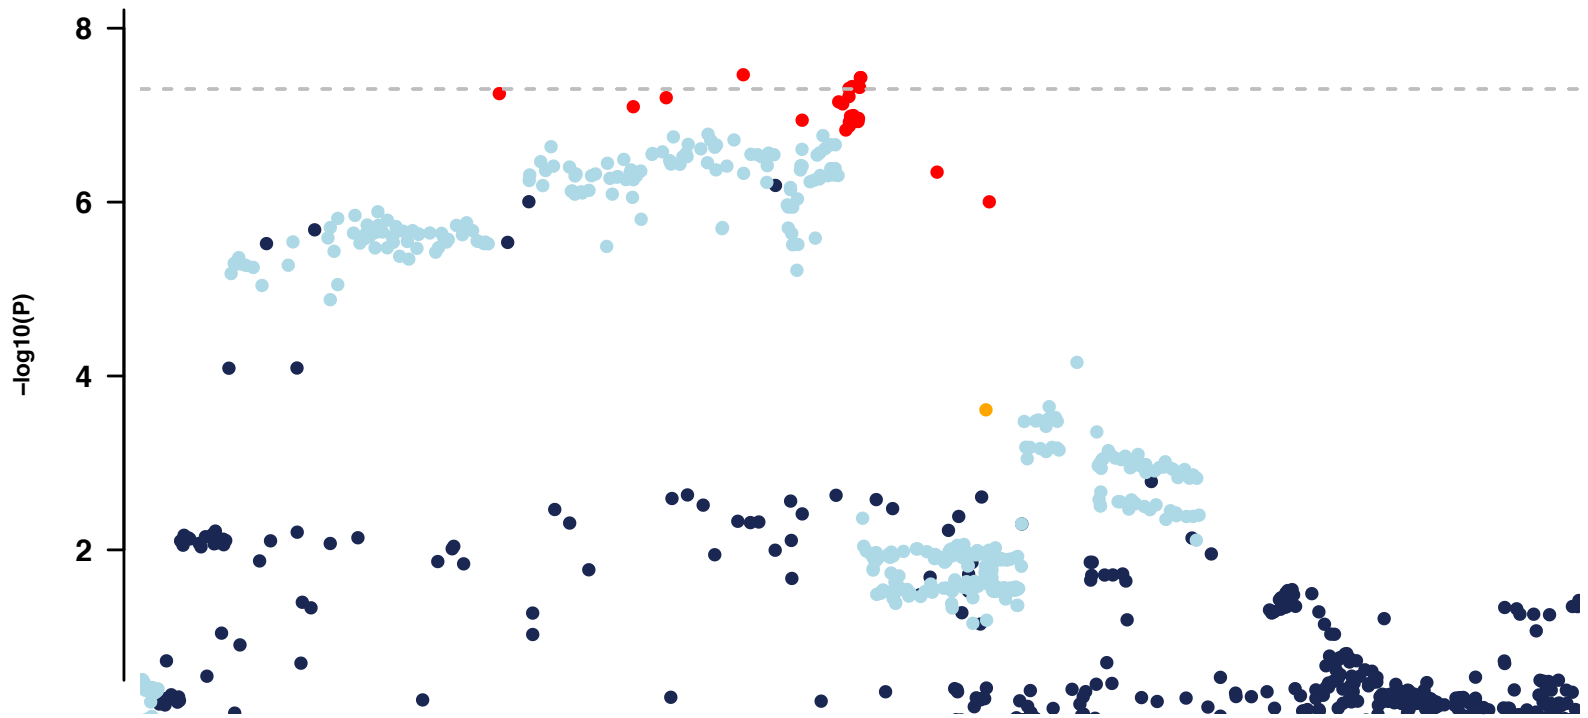

CENPW

RSP

HGE

|

# Mean\_inferiorparietal\_surfvag: rs79272390

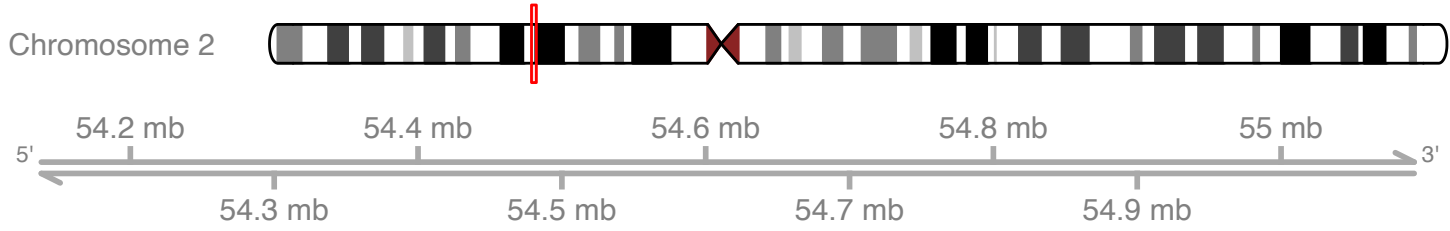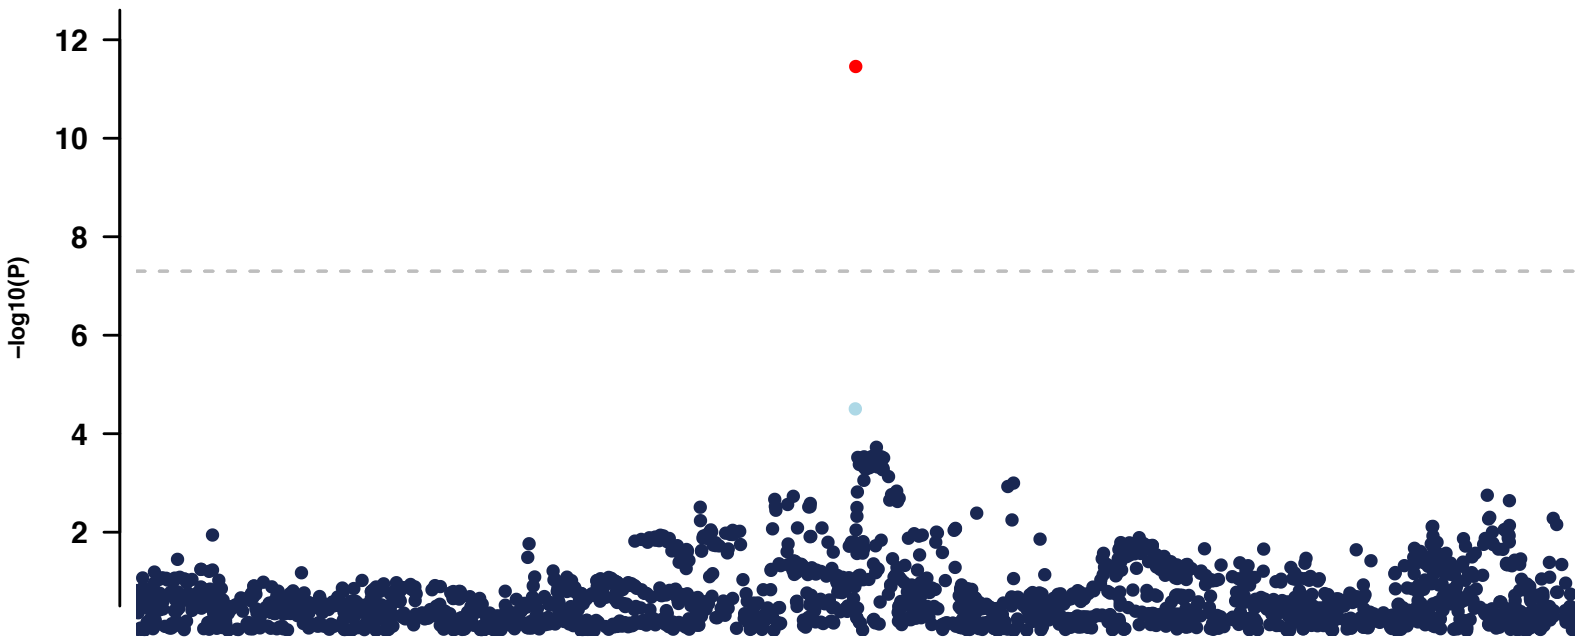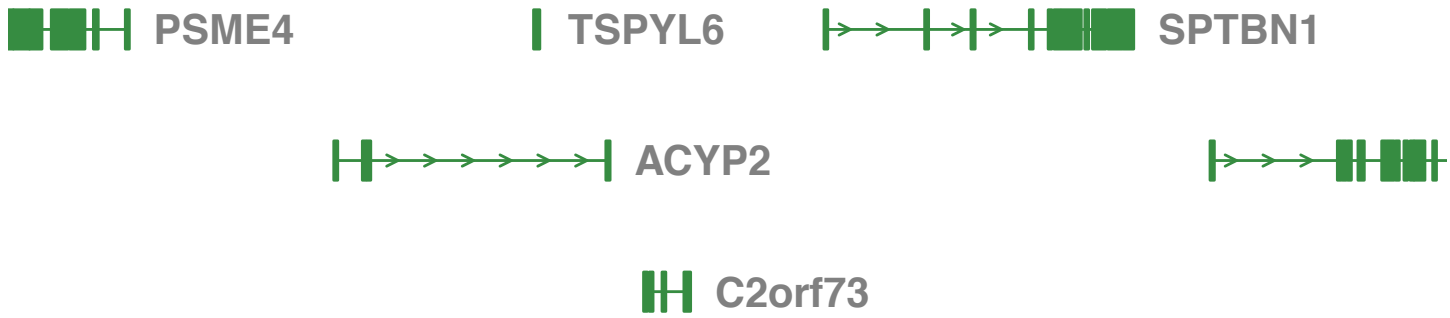

HGE

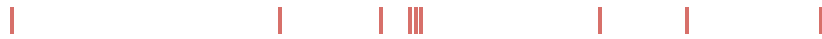



# Mean\_inferiorparietal\_suravg: rs1413536

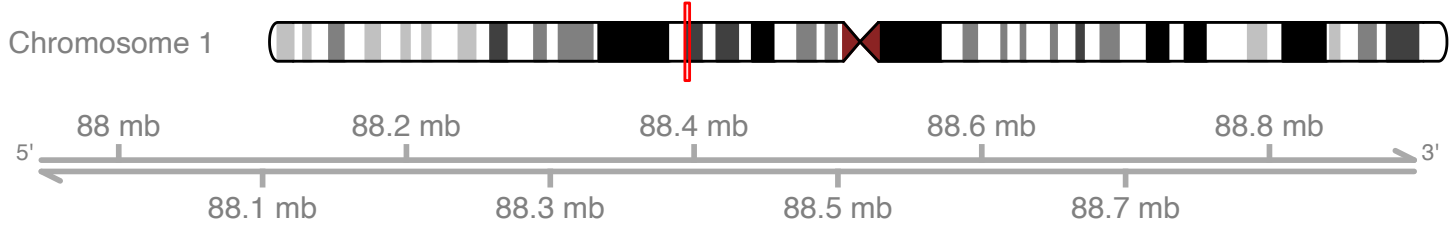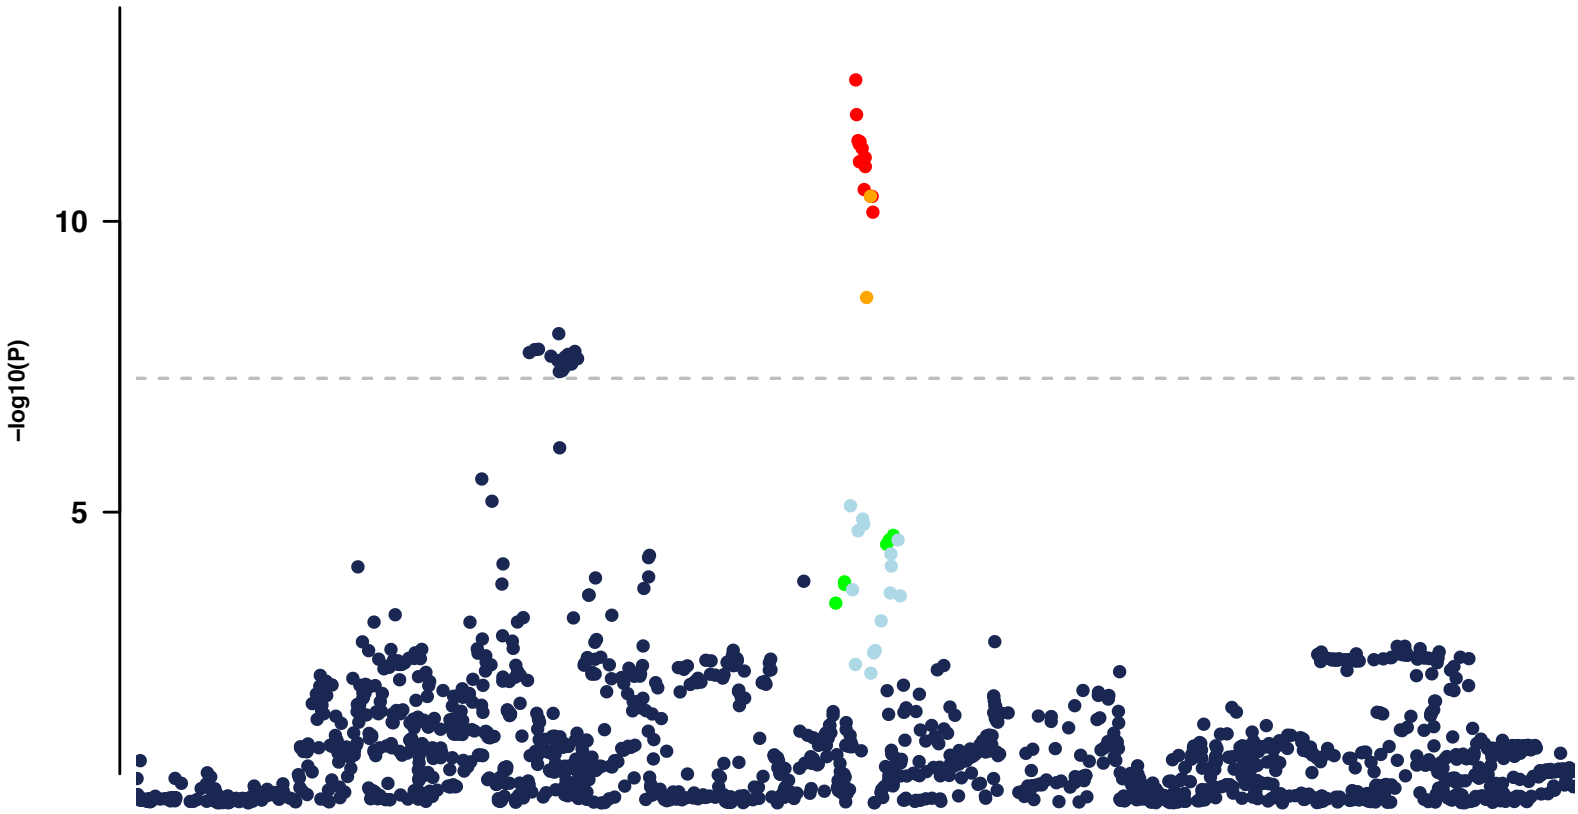

HGE

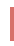

# Mean\_fusifform\_surfvag: rs2074404

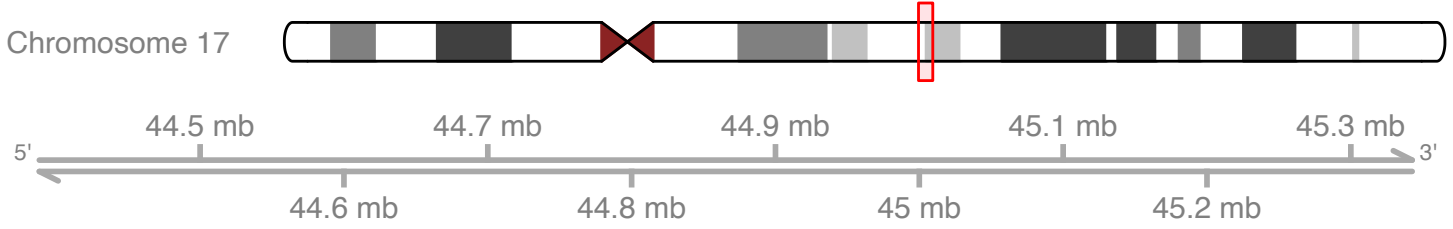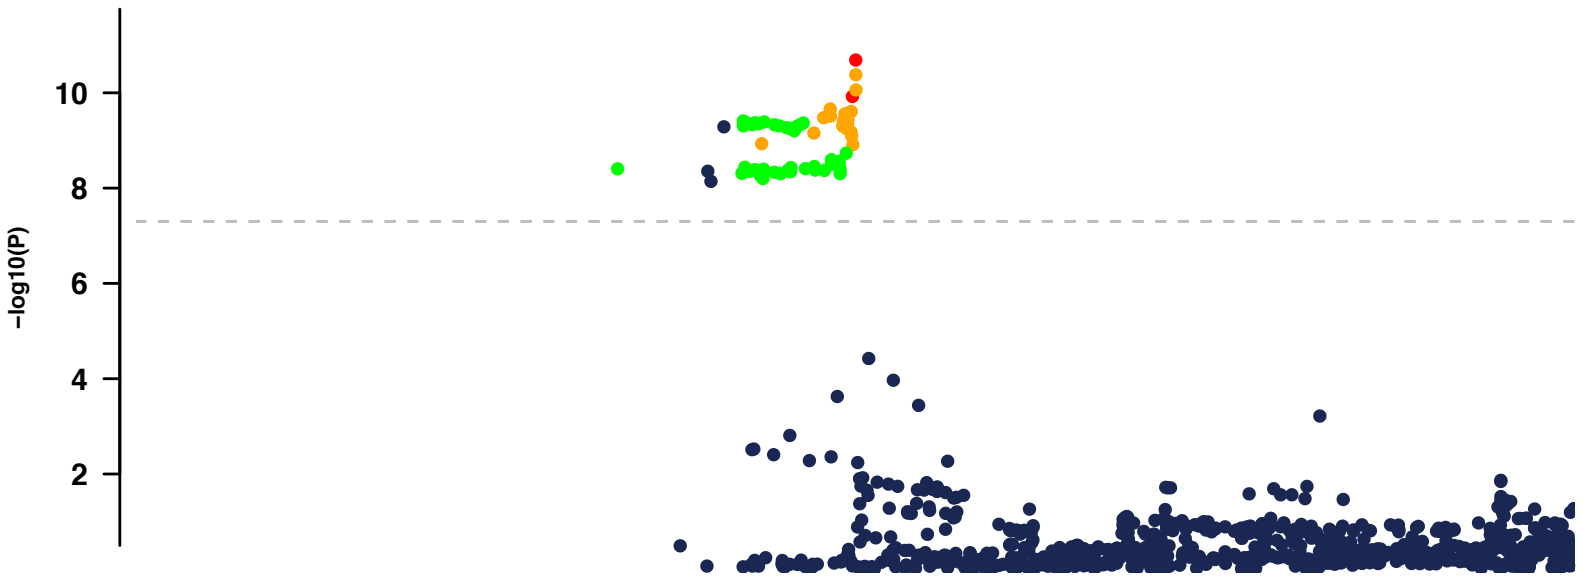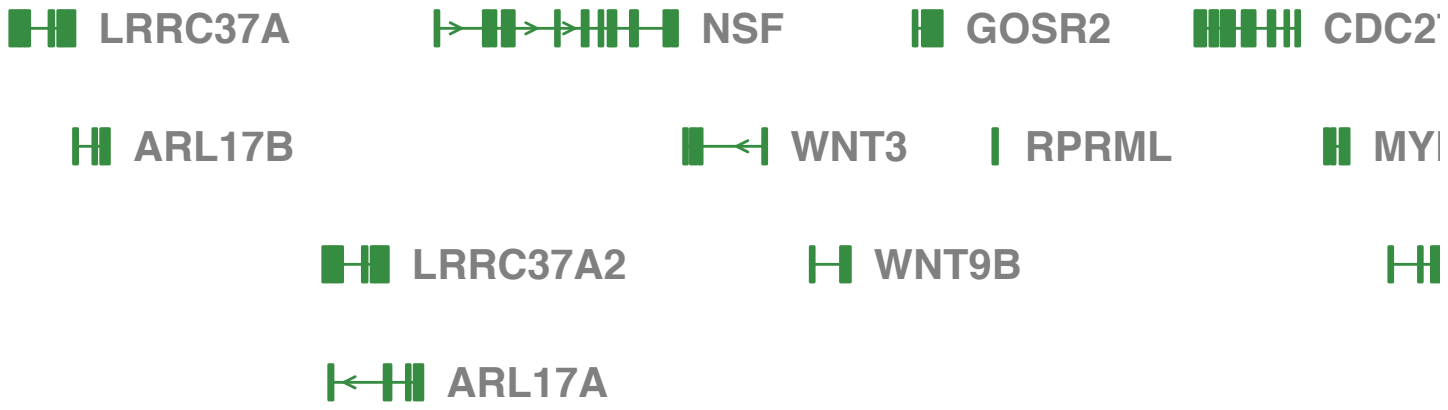

HGE

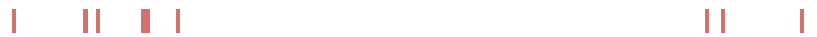

# Mean\_entorhinal\_suravg: rs4147321

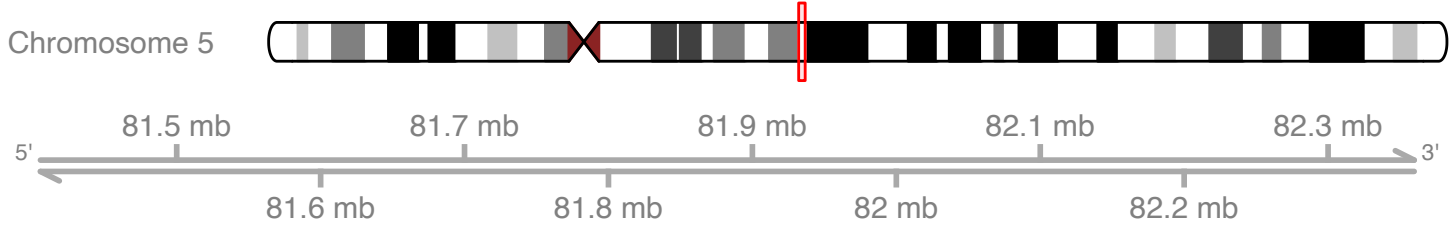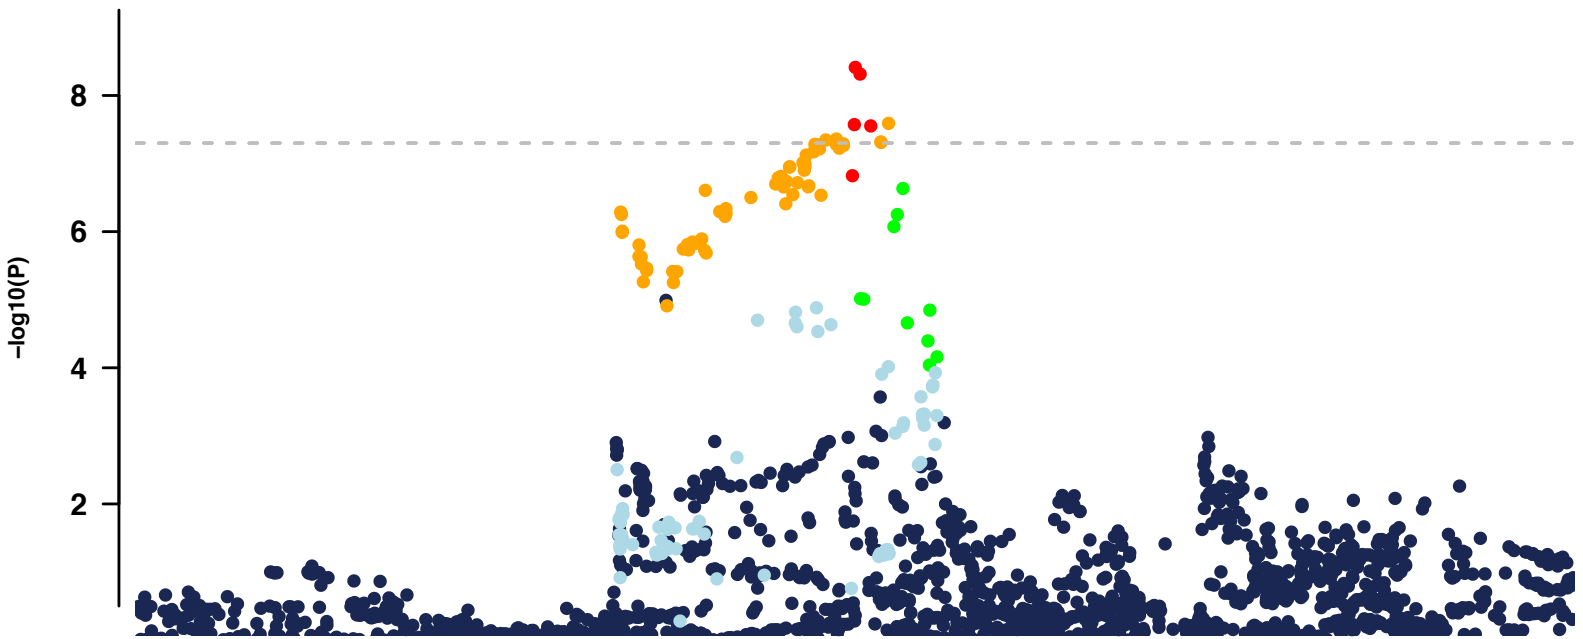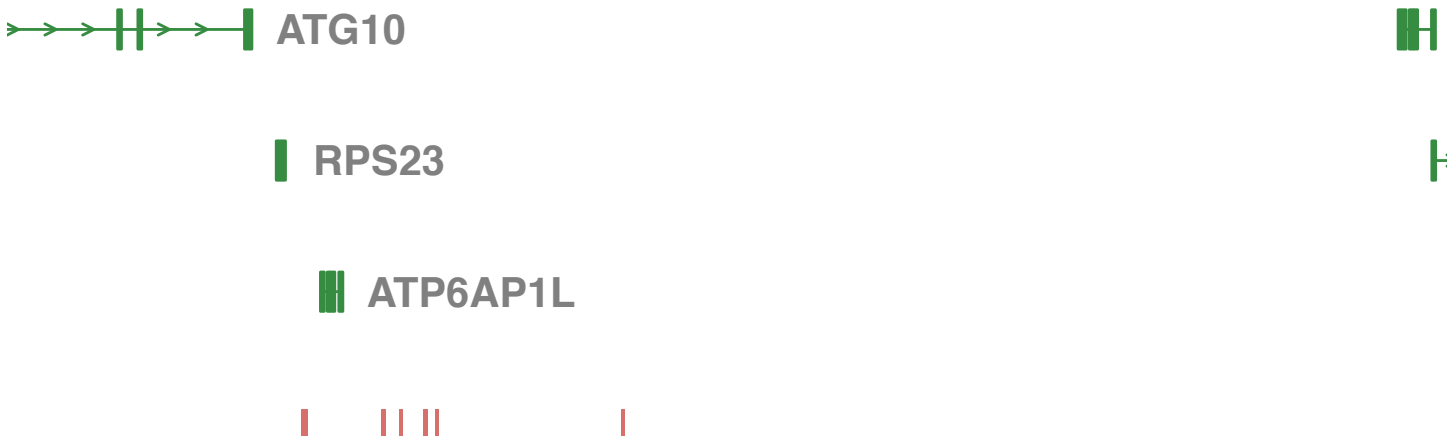

# Mean\_caudalmiddlefrontal\_surfvag: rs60565673

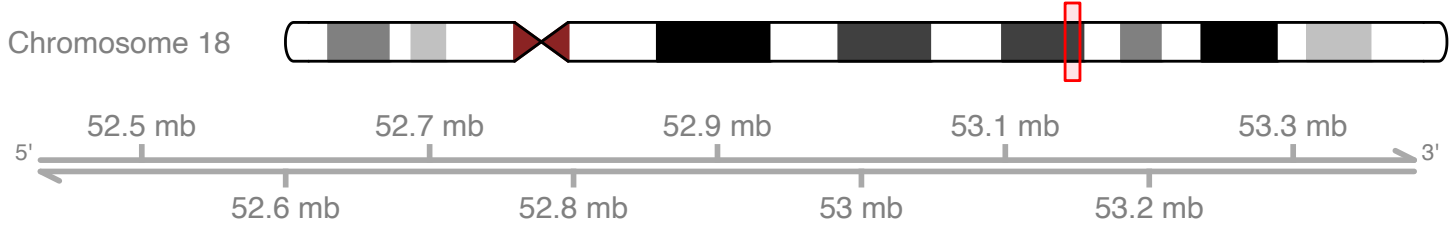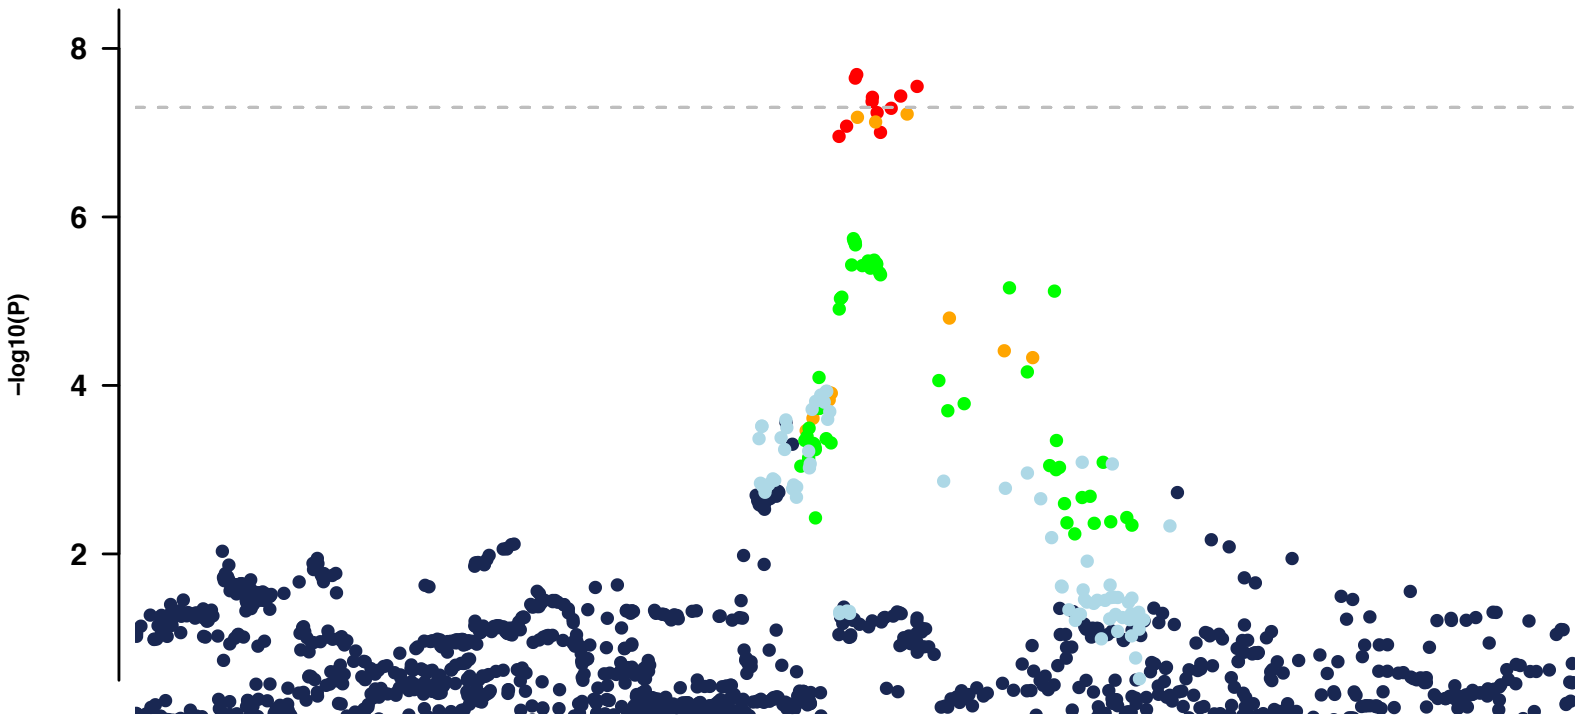

RAB27B

TCF4

CCDC68

HGE

|

|

# Mean\_Full\_SurfArea: rs2802295

Chromosome 6

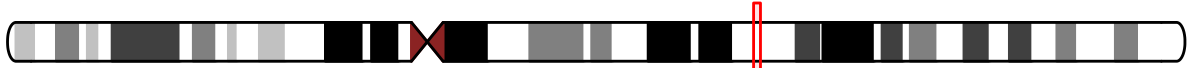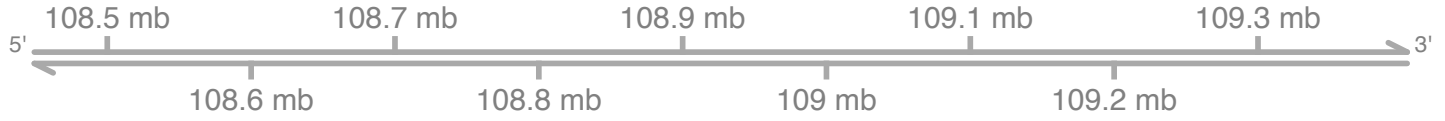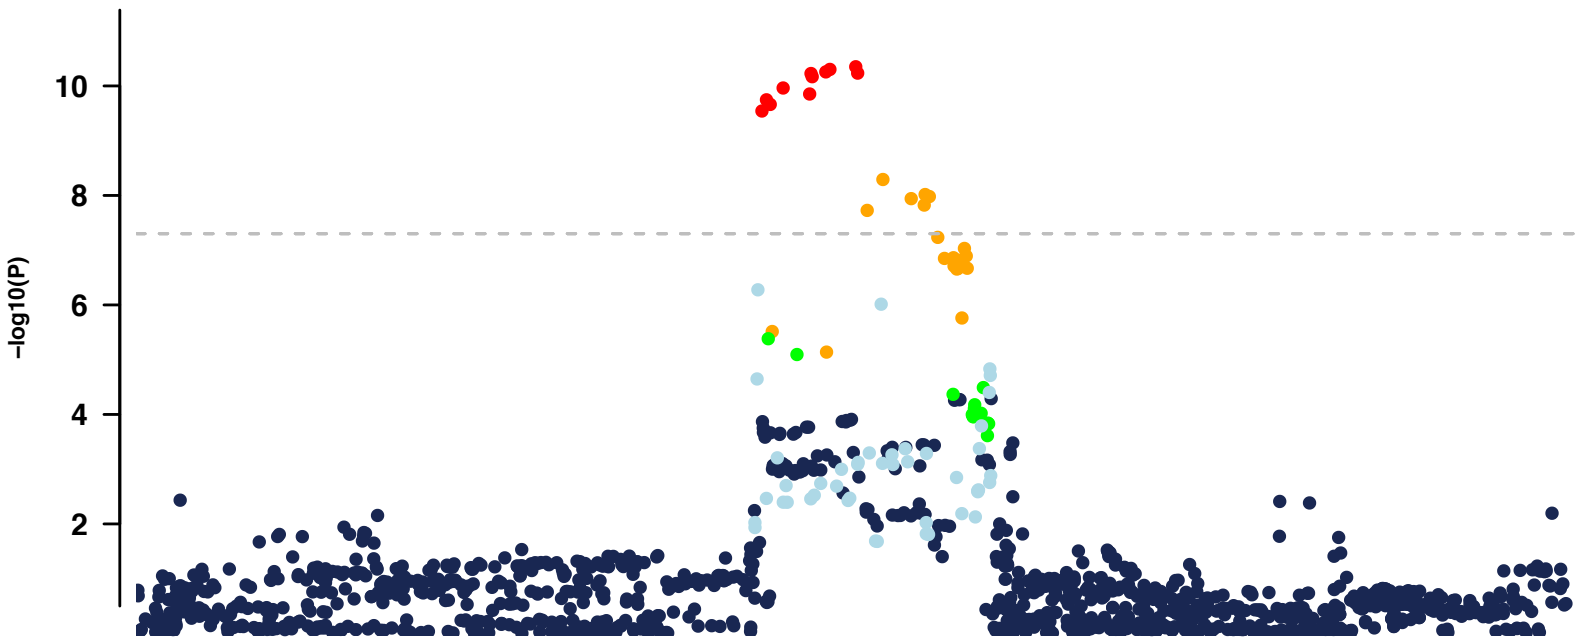

NR2E1

FO XO3

ARMC2

SNX3

LACE1

HGE

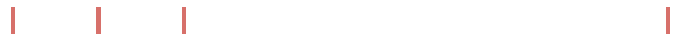

# Mean\_Full\_SurfArea: rs34464850

Chromosome 3

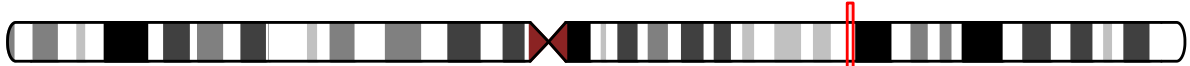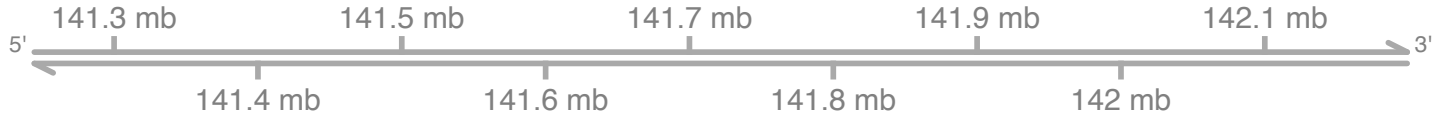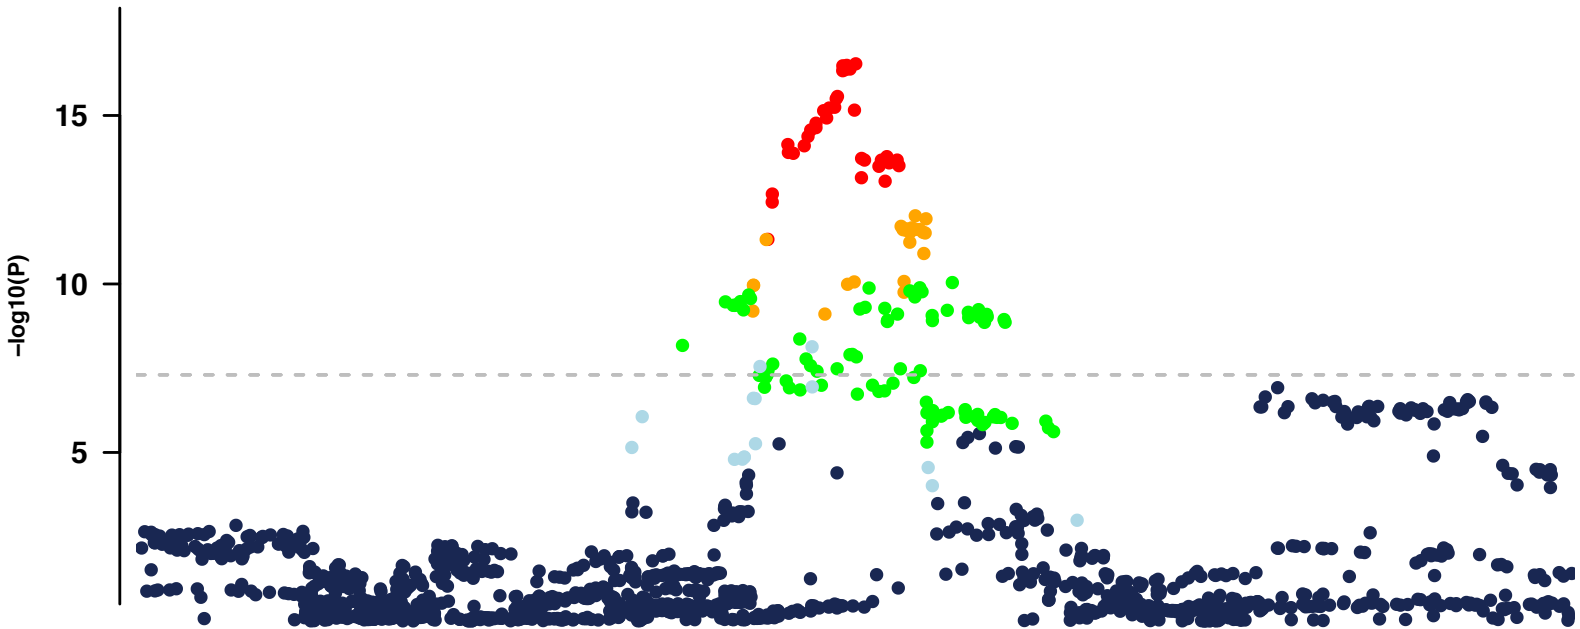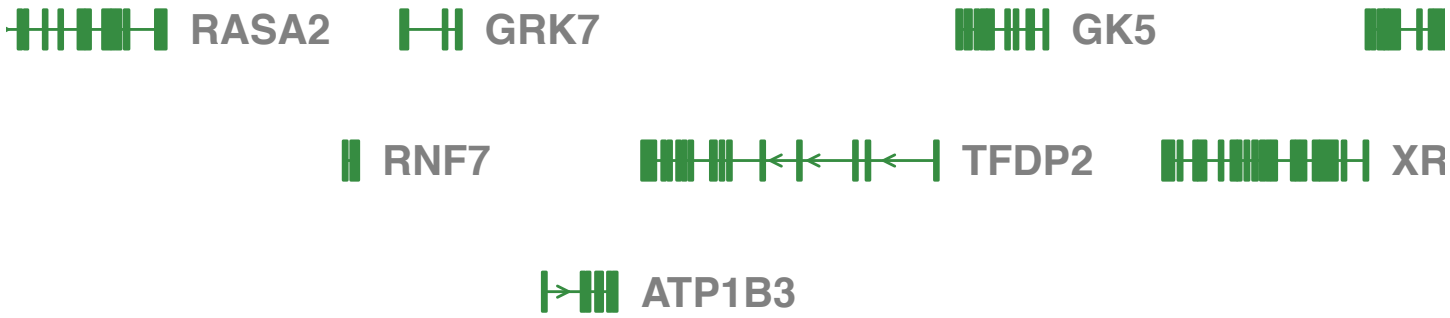

HGE

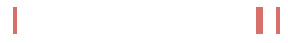

# Mean\_Full\_SurfArea: rs2037442

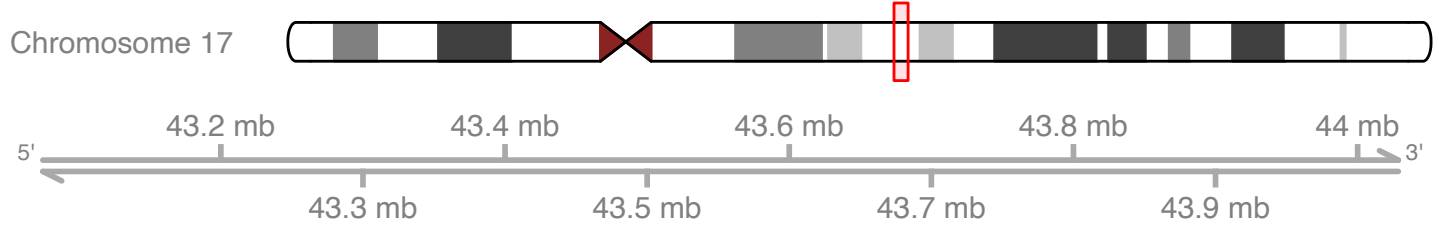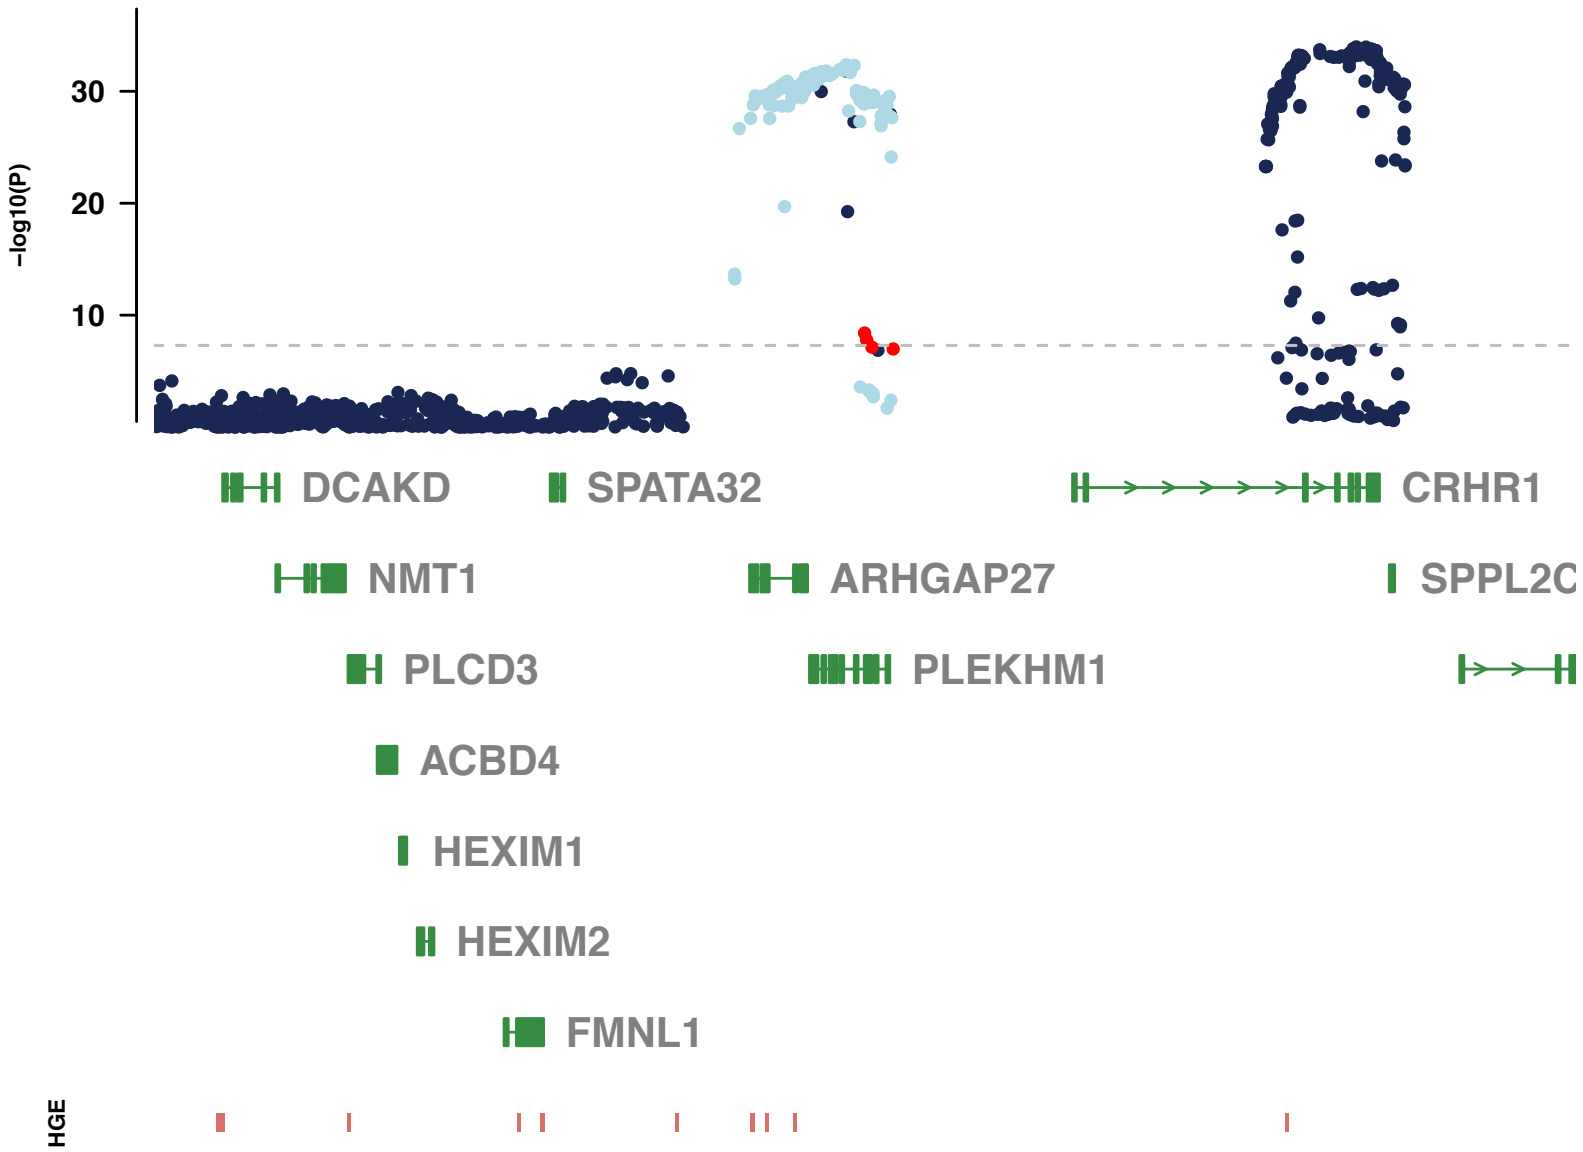

# Mean\_Full\_SurfArea: rs79600142

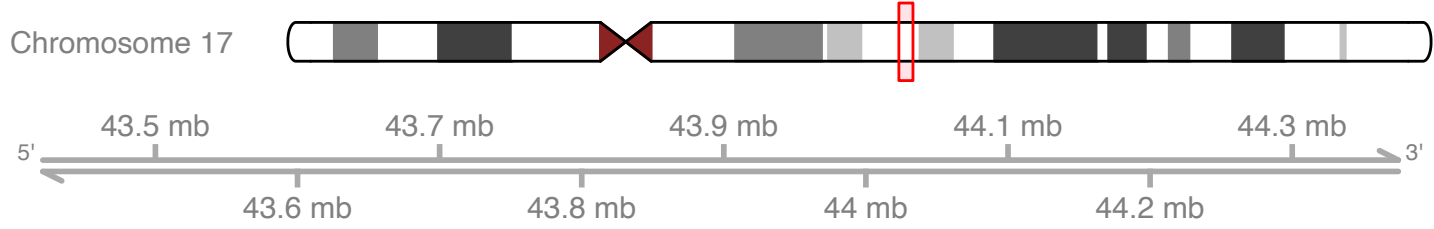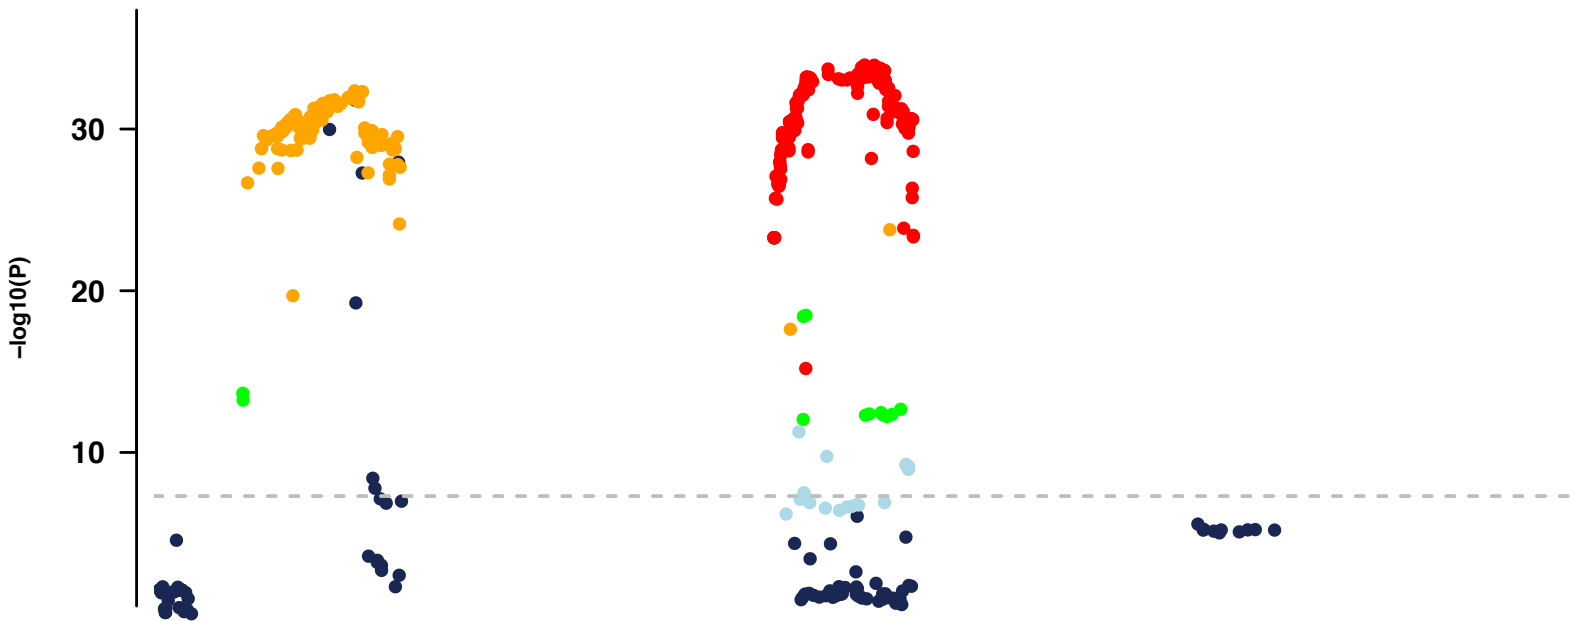

ARHGAP27

SPPL2C

KANS

PLEKHM1

MAPT

CRHR1

STH

HGE

| | |

|

|



# Mean\_Full\_SurfArea: rs10878349

Chromosome 12

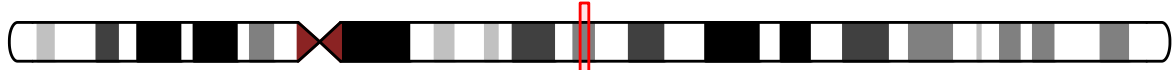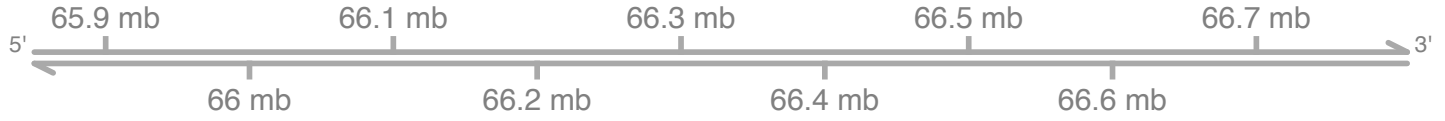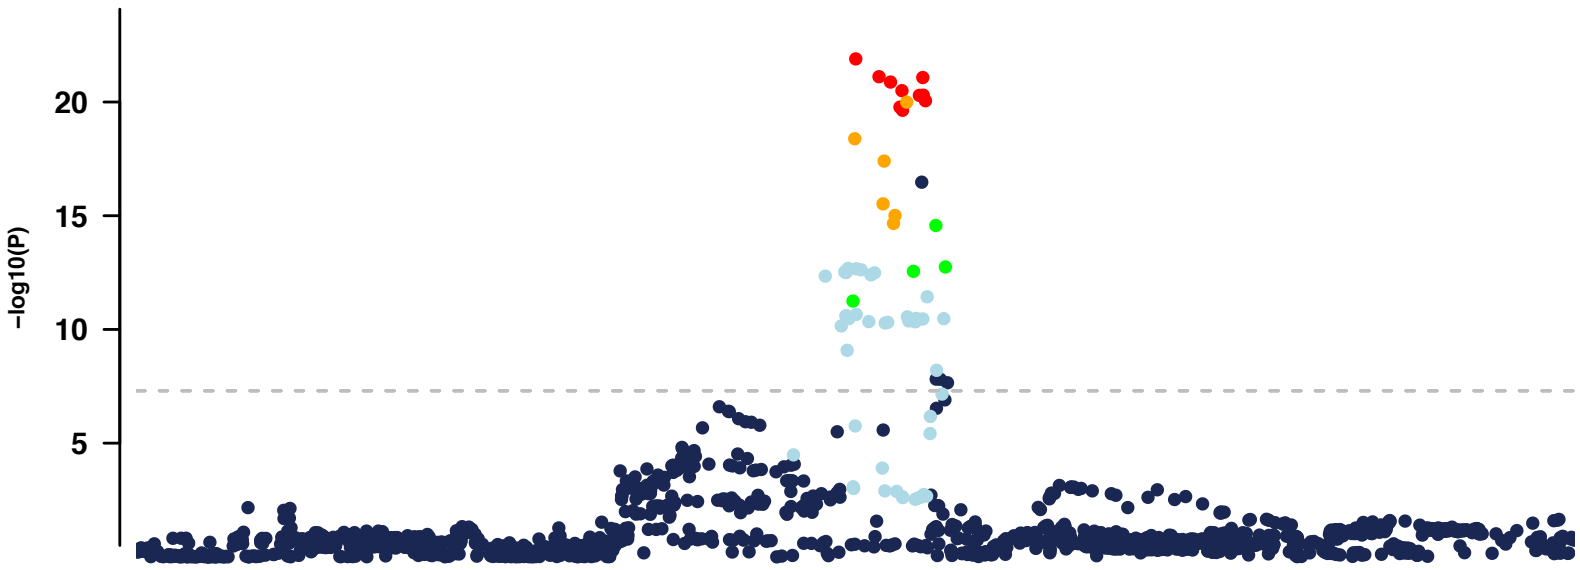

MSRB3

HMGA2

IRAK3

LLPH

HELB

TMBIM4

HGE

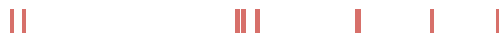

### Mean\_Full\_SurfArea: rs11171739

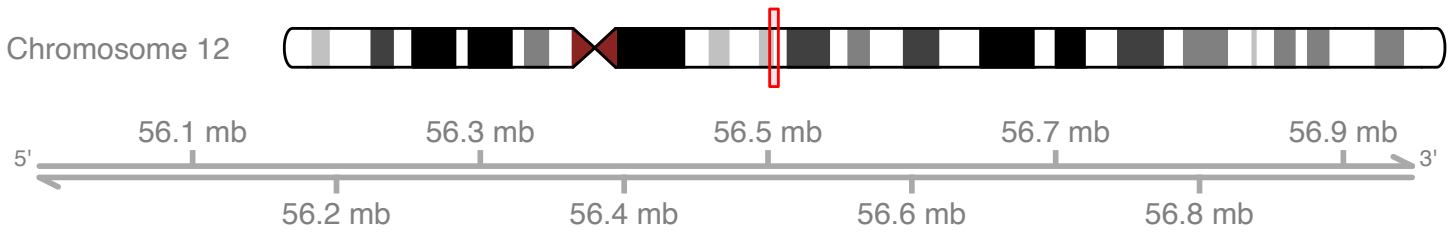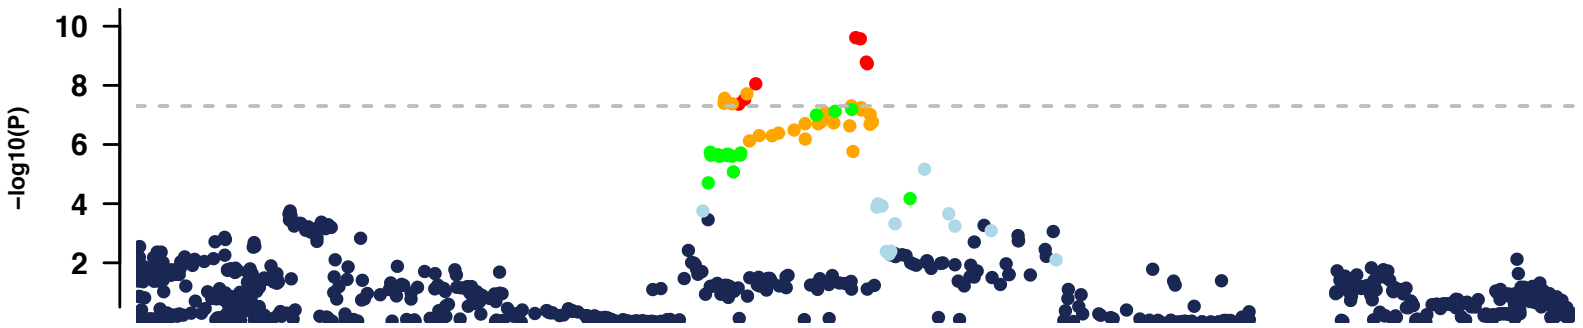

- OR10P1    ORMDL2    IKZF4    RNF41    TIMELES
- METTLL7B    WIBG    ERBB3    COQ10A    MIP
- ITGA7    DGKA    PA2G4    CS    SPRYD
- BLOC1S1    PMEL    RPL41    CNPY2    GLS2
- RDH5    CDK2    ZC3H10    PAN2    >
- CD63    RAB5B    MYL6B    IL23A
- GDF11    SUOX    MYL6    STAT2
- SARNP    RPS26    NABP2
- DNAJC14    ESYT1    APOF
- MMP19    SMARCC2
- SLC39A5
- ANKRD52

HGE

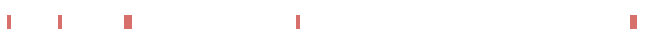

# Mean\_Full\_SurfArea: rs17543864

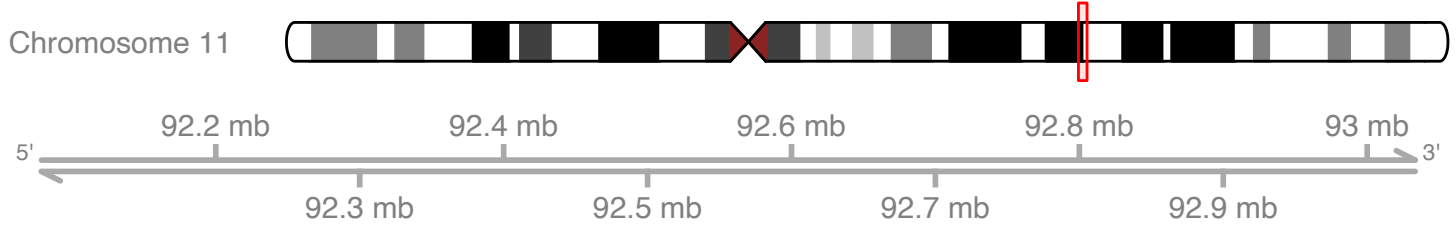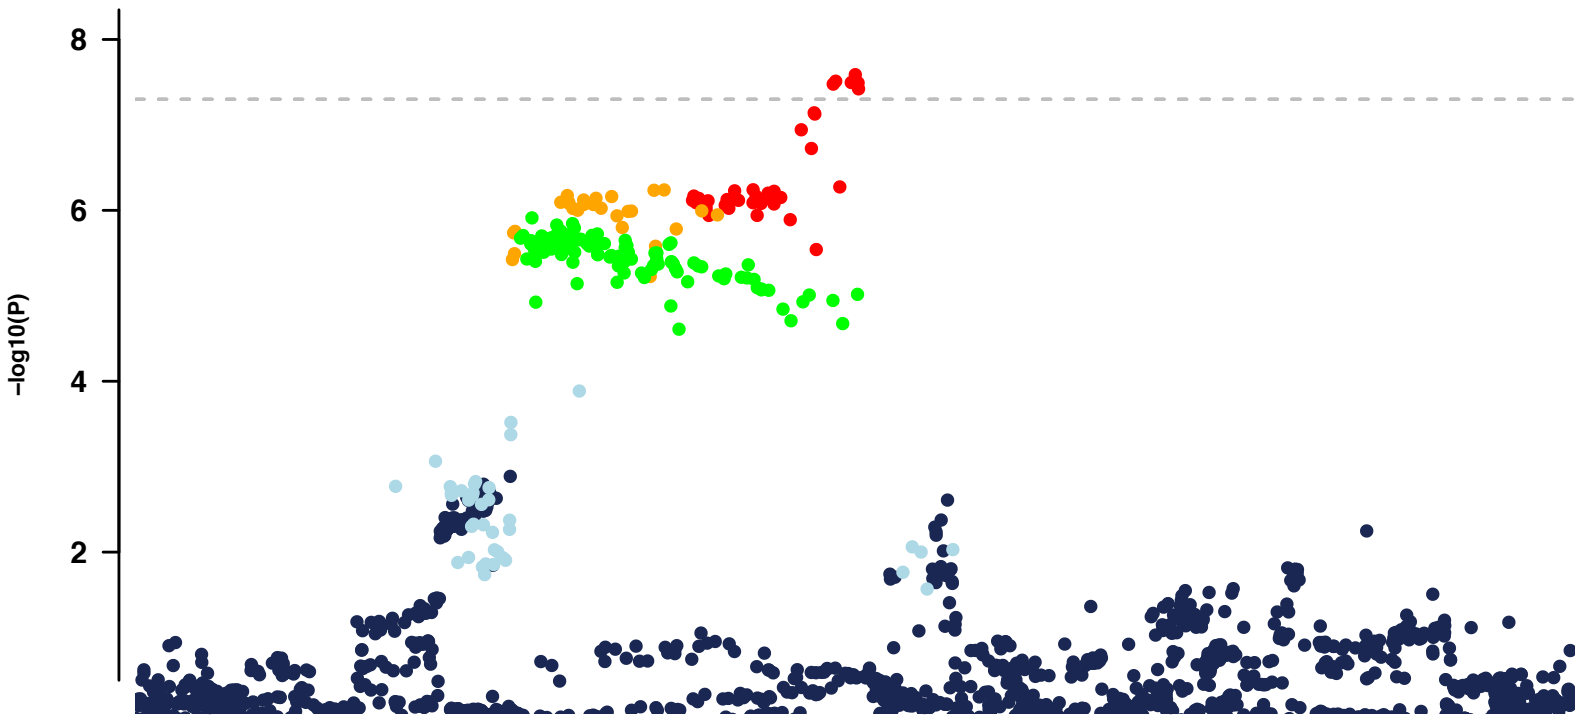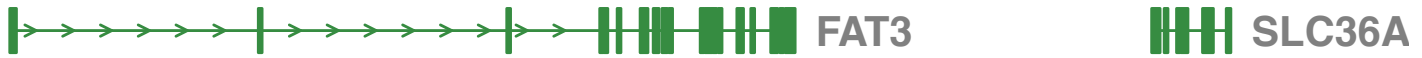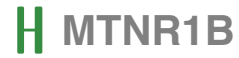

HGE

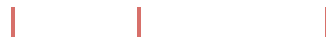

Supplement: figs11_bhaa327.pdf [file figs11_bhaa327.pdf]
